# Supplementary material for: “Click” synthesis of small-molecule inhibitors targeting caspases
Source: Royal Society of Chemistry journal article supplement (doi:10.1039/b718304f), 2008-01-01

## **Supporting Information II (LC-MS and NMR characterization)**

### **“Click” synthesis of vinyl sulfone-containing small molecule inhibitors targeting caspases**

SL Ng<sup>†</sup>, P-Y Yang<sup>†,\*</sup>, KYT Chen<sup>†,\*</sup>, R Srinivasan<sup>†</sup>, SQ Yao<sup>\*</sup>

*Departments of Chemistry and Biological Sciences, Medicinal Chemistry Program of the Office of Life Sciences, National University of Singapore, 3 Science Drive 3, Singapore 117543, Republic of Singapore*

#### **1. Summary of Characterizations of "Click" Inhibitors**

| #   | ID of "Click" Product | Azide Used | LCMS          |         |          | <sup>1</sup> H NMR (Scaled up and purified) |
|-----|-----------------------|------------|---------------|---------|----------|---------------------------------------------|
|     |                       |            | Est % Purity* | Cal. MW | Obs. MW  |                                             |
| 001 | VSB-A1                | A1         | >95           | 515.13  | 516.1330 | -                                           |
| 002 | VSB-A2                | A2         | >95           | 515.13  | 516.1190 | -                                           |
| 003 | VSB-A3                | A3         | -             | 533.12  | -        | -                                           |
| 004 | VSB-A4                | A4         | >95           | 533.12  | 534.1190 | -                                           |
| 005 | VSB-A5                | A5         | >95           | 529.14  | 530.1530 | -                                           |
| 006 | VSB-A6                | A6         | >95           | 529.14  | 530.1470 | -                                           |
| 007 | VSB-A7                | A7         | -             | 565.06  | N.D.     | -                                           |
| 008 | VSB-A8                | A8         | >95           | 531.10  | 532.0890 | -                                           |
| 009 | VSB-A9                | A9         | >95           | 545.11  | 546.1020 | -                                           |
| 010 | VSB-A10               | A10        | -             | 565.06  | -        | -                                           |
| 011 | VSB-A11               | A11        | >95           | 561.11  | 562.1000 | -                                           |
| 012 | VSB-A12               | A12        | >95           | 541.16  | 542.1530 | -                                           |
| 013 | VSB-B1                | B1         | >95           | 589.16  | 590.1540 | -                                           |
| 014 | VSB-B2                | B2         | >95           | 557.16  | 558.1460 | -                                           |
| 015 | VSB-B3                | B3         | >95           | 541.16  | 542.1540 | -                                           |
| 016 | VSB-B4                | B4         | >95           | 527.15  | 528.1420 | -                                           |
| 017 | VSB-B5                | B5         | >95           | 587.17  | 588.1550 | -                                           |
| 018 | VSB-B6                | B6         | >95           | 555.18  | 556.1840 | -                                           |
| 019 | VSB-B7                | B7         | >95           | 543.12  | 544.1300 | -                                           |
| 020 | VSB-B8                | B8         | >98           | 581.12  | 582.1320 | -                                           |
| 021 | VSB-B9                | B9         | >95           | 527.15  | 528.1520 | -                                           |
| 022 | VSB-B10               | B10        | >95           | 557.16  | 558.1480 | -                                           |
| 023 | VSB-B11               | B11        | >95           | 589.16  | 590.1490 | -                                           |
| 024 | VSB-B12               | B12        | >95           | 527.15  | 528.1400 | -                                           |
| 025 | VSB-C1                | C1         | >95           | 583.21  | 584.2160 | -                                           |

|     |          |      |     |        |          |   |
|-----|----------|------|-----|--------|----------|---|
| 026 | VSB-C2   | C2   | -   | 623.12 | -        | - |
| 027 | VSB-C3   | C3   | >95 | 581.12 | 582.1260 | - |
| 028 | VSB-C4   | C4   | >95 | 525.17 | 526.1580 | - |
| 029 | VSB-C5   | C5   | >95 | 525.17 | 526.1760 | - |
| 030 | VSB-C6   | C6   | >95 | 553.20 | 554.2070 | - |
| 031 | VSB-C7   | C7   | >95 | 525.17 | 526.1600 | - |
| 032 | VSB-C8   | C8   | >95 | 567.22 | 568.2050 | - |
| 033 | VSB-C9   | C9   | >95 | 569.16 | 570.1630 | - |
| 034 | VSB-C10  | C10  | >95 | 569.16 | 570.1450 | - |
| 035 | VSB-C11  | C11  | >90 | 595.25 | 596.2520 | - |
| 036 | VSB-C12  | C12  | >95 | 547.15 | 548.1560 | - |
| 037 | VSB-D1   | D1   | >90 | 597.17 | 598.1790 | - |
| 038 | VSB-D2   | D2   | >95 | 551.18 | 552.1940 | - |
| 039 | VSB-D3   | D3   | >95 | 599.17 | 623.1900 | - |
| 040 | VSB-D4   | D4   | >95 | 561.17 | 562.1780 | - |
| 041 | VSB-SA1  | SA1  | >95 | 589.13 | 590.1400 | - |
| 042 | VSB-SA2  | SA2  | -   | 623.15 | -        | - |
| 043 | VSB-SA3  | SA3  | >95 | 581.08 | 582.0890 | - |
| 044 | VSB-SA4  | SA4  | >95 | 587.04 | 588.0430 | - |
| 045 | VSB-SA5  | SA5  | -   | 561.14 | -        | - |
| 046 | VSB-SA6  | SA6  | >95 | 583.10 | 584.1130 | - |
| 047 | VSB-SA7  | SA7  | >95 | 583.10 | 584.1080 | - |
| 048 | VSB-SA8  | SA8  | >95 | 575.15 | 576.1610 | - |
| 049 | VSB-SA9  | SA9  | >95 | 565.11 | 566.1060 | - |
| 050 | VSB-SA10 | SA10 | >95 | 565.11 | 566.1100 | - |
| 051 | VSB-SA11 | SA11 | >95 | 565.11 | 566.1150 | - |
| 052 | VSB-SA12 | SA12 | >95 | 579.13 | 580.1300 | - |
| 053 | VSB-SB1  | SB1  | -   | 579.13 | -        | - |
| 054 | VSB-SB2  | SB2  | >95 | 589.17 | 590.1760 | - |
| 055 | VSB-SB3  | SB3  | -   | 577.13 | -        | - |
| 056 | VSB-SB5  | SB5  | -   | 597.14 | -        | - |
| 057 | VSB-SB6  | SB6  | >95 | 597.14 | 598.1310 | - |
| 058 | VSB-SB7  | SB7  | >95 | 592.10 | 598.136  | - |
| 059 | VSB-SB8  | SB8  | >95 | 592.10 | 593.1040 | - |
| 060 | VSB-SB9  | SB9  | >95 | 603.18 | N.D.     | - |
| 061 | VSB-SB10 | SB10 | >95 | 553.08 | N.D.     | - |
| 062 | VSB-SB11 | SB11 | >95 | 561.14 | N.D.     | - |
| 063 | VSB-SB12 | SB12 | >95 | 545.11 | 542.163  | - |
| 064 | VSB-SC1  | SC1  | >95 | 541.16 | 546.117  | - |
| 065 | VSB-SC2  | SC2  | >95 | 607.10 | 608.0910 | - |

|     |         |     |     |        |          |   |
|-----|---------|-----|-----|--------|----------|---|
| 066 | VSB-SC3 | SC3 | >95 | 591.11 | 592.1140 | - |
| 067 | VSP-A1  | A1  | >95 | 495.16 | 496.1660 | - |
| 068 | VSP-A2  | A2  | >95 | 495.16 | 496.1660 | - |
| 069 | VSP-A3  | A3  | -   | 513.15 | -        | - |
| 070 | VSP-A4  | A4  | >95 | 513.15 | 514.1590 | - |
| 071 | VSP-A5  | A5  | >95 | 509.17 | 510.1790 | - |
| 072 | VSP-A6  | A6  | >95 | 509.17 | 510.1850 | - |
| 073 | VSP-A7  | A7  | -   | 545.09 | N.D.     | - |
| 074 | VSP-A8  | A8  | >95 | 511.13 | 512.1380 | - |
| 075 | VSP-A9  | A9  | >95 | 525.14 | 526.1510 | - |
| 076 | VSP-A10 | A10 | -   | 545.09 | -        | - |
| 077 | VSP-A11 | A11 | >95 | 541.14 | 542.1490 | - |
| 078 | VSP-A12 | A12 | >95 | 521.19 | 522.2030 | - |
| 079 | VSP-B1  | B1  | >95 | 569.19 | 570.2080 | - |
| 080 | VSP-B2  | B2  | >95 | 537.19 | 538.1980 | - |
| 081 | VSP-B3  | B3  | >95 | 521.19 | 522.2030 | - |
| 082 | VSP-B4  | B4  | >95 | 507.18 | 508.1840 | - |
| 083 | VSP-B5  | B5  | >95 | 567.20 | 568.2090 | - |
| 084 | VSP-B6  | B6  | >95 | 535.21 | 536.2190 | - |
| 085 | VSP-B7  | B7  | >95 | 523.16 | 524.1650 | - |
| 086 | VSP-B8  | B8  | >95 | 561.15 | 562.1610 | - |
| 087 | VSP-B9  | B9  | >95 | 507.18 | 508.1820 | - |
| 088 | VSP-B10 | B10 | >95 | 537.19 | 538.1970 | - |
| 089 | VSP-B11 | B11 | >95 | 569.19 | 570.1990 | - |
| 090 | VSP-B12 | B12 | >95 | 507.18 | 508.1870 | - |
| 091 | VSP-C1  | C1  | >95 | 563.24 | 564.2460 | - |
| 092 | VSP-C2  | C2  | -   | 603.16 | -        | - |
| 093 | VSP-C3  | C3  | >95 | 561.15 | 562.1590 | - |
| 094 | VSP-C4  | C4  | >95 | 505.20 | 506.2050 | - |
| 095 | VSP-C5  | C5  | >95 | 505.20 | 506.2090 | - |
| 096 | VSP-C6  | C6  | >95 | 533.23 | 534.2340 | - |
| 097 | VSP-C7  | C7  | >95 | 505.20 | 506.2100 | - |
| 098 | VSP-C8  | C8  | >95 | 547.25 | 548.2530 | - |
| 099 | VSP-C9  | C9  | >95 | 549.19 | 550.1900 | - |
| 100 | VSP-C10 | C10 | -   | 569.16 | N.D.     | - |
| 101 | VSP-C11 | C11 | >95 | 575.28 | 576.2840 | - |
| 102 | VSP-C12 | C12 | >95 | 527.18 | 528.1890 | - |
| 103 | VSP-D1  | D1  | >95 | 577.20 | 578.1940 | - |
| 104 | VSP-D2  | D2  | >90 | 531.22 | 532.2240 | - |
| 105 | VSP-D3  | D3  | -   | 579.20 | N.D.     | - |

|     |          |      |     |        |          |   |
|-----|----------|------|-----|--------|----------|---|
| 106 | VSP-D4   | D4   | >95 | 541.20 | 542.2100 | - |
| 107 | VSP-SA1  | SA1  | >95 | 569.16 | 570.1690 | - |
| 108 | VSP-SA2  | SA2  | >95 | 603.18 | 604.1910 | - |
| 109 | VSP-SA3  | SA3  | >95 | 561.11 | 562.1210 | - |
| 110 | VSP-SA4  | SA4  | >95 | 567.07 | 568.0750 | - |
| 111 | VSP-SA5  | SA5  | >95 | 541.17 | 542.1760 | - |
| 112 | VSP-SA6  | SA6  | >95 | 563.13 | 563.1300 | - |
| 113 | VSP-SA7  | SA7  | >95 | 563.13 | 564.1370 | - |
| 114 | VSP-SA8  | SA8  | >95 | 555.18 | 556.1870 | - |
| 115 | VSP-SA9  | SA9  | >95 | 545.14 | 546.1450 | - |
| 116 | VSP-SA10 | SA10 | >95 | 545.14 | 546.1430 | - |
| 117 | VSP-SA11 | SA11 | >95 | 545.14 | 546.1440 | - |
| 118 | VSP-SA12 | SA12 | >95 | 559.16 | 560.1570 | - |
| 119 | VSP-SB1  | SB1  | >95 | 559.16 | 560.1680 | - |
| 120 | VSP-SB2  | SB2  | -   | 569.20 | N.D.     | √ |
| 121 | VSP-SB3  | SB3  | >95 | 557.16 | 558.1640 | - |
| 122 | VSP-SB5  | SB5  | -   | 577.17 | -        | - |
| 123 | VSP-SB6  | SB6  | >95 | 597.14 | N.D.     | - |
| 124 | VSP-SB7  | SB7  | >95 | 572.14 | 578.1670 | - |
| 125 | VSP-SB8  | SB8  | >95 | 572.14 | 573.1420 | - |
| 126 | VSP-SB9  | SB9  | >95 | 583.21 | N.D.     | - |
| 127 | VSP-SB10 | SB10 | >95 | 533.11 | N.D.     | - |
| 128 | VSP-SB11 | SB11 | >95 | 541.17 | N.D.     | - |
| 129 | VSP-SB12 | SB12 | >95 | 525.14 | N.D.     | - |
| 130 | VSP-SC1  | SC1  | -   | 521.19 | -        | - |
| 131 | VSP-SC2  | SC2  | >98 | 587.14 | 588.1330 | - |
| 132 | VSP-SC3  | SC3  | >90 | 571.14 | 572.1340 | - |
| 133 | Ald-A1   | A1   | -   | 363.10 | 364.1013 | - |
| 134 | Ald-A2   | A2   | -   | 363.10 | 364.1067 | - |
| 135 | Ald-A3   | A3   | -   | 381.09 | N.D.     | - |
| 136 | Ald-A4   | A4   | -   | 381.09 | N.D.     | - |
| 137 | Ald-A5   | A5   | -   | 377.11 | 378.1137 | - |
| 138 | Ald-A6   | A6   | -   | 377.11 | 378.1246 | - |
| 139 | Ald-A7   | A7   | -   | 379.07 | -        | - |
| 140 | Ald-A8   | A8   | -   | 379.07 | 380.0730 | - |
| 141 | Ald-A9   | A9   | -   | 393.08 | 394.1000 | - |
| 142 | Ald-A10  | A10  | -   | 413.03 | -        | - |
| 143 | Ald-A11  | A11  | -   | 409.08 | 410.0900 | - |
| 144 | Ald-A12  | A12  | -   | 389.13 | 390.1450 | - |
| 145 | Ald-B1   | B1   | -   | 437.13 | 438.1478 | - |

|     |          |      |   |        |          |   |
|-----|----------|------|---|--------|----------|---|
| 146 | Ald-B2   | B2   | - | 405.13 | 406.1385 | - |
| 147 | Ald-B3   | B3   | - | 389.13 | 390.1411 | - |
| 148 | Ald-B4   | B4   | - | 375.12 | 375.1200 | - |
| 149 | Ald-B5   | B5   | - | 435.14 | 436.1390 | - |
| 150 | Ald-B6   | B6   | - | 403.15 | 404.1530 | - |
| 151 | Ald-B7   | B7   | - | 391.10 | 392.0980 | - |
| 152 | Ald-B8   | B8   | - | 429.09 | 429.0900 | - |
| 153 | Ald-B9   | B9   | - | 375.12 | 376.1200 | - |
| 154 | Ald-B10  | B10  | - | 405.13 | 406.1330 | - |
| 155 | Ald-B11  | B11  | - | 437.13 | 438.1350 | - |
| 156 | Ald-B12  | B12  | - | 375.12 | 376.1250 | - |
| 157 | Ald-C1   | C1   | - | 431.18 | 432.1850 | - |
| 158 | Ald-C2   | C2   | - | 471.06 | -        | - |
| 159 | Ald-C3   | C3   | - | 429.05 | -        | - |
| 160 | Ald-C4   | C4   | - | 373.14 | 374.1450 | - |
| 161 | Ald-C5   | C5   | - | 373.14 | 374.1380 | - |
| 162 | Ald-C6   | C6   | - | 401.17 | 402.1750 | - |
| 163 | Ald-C7   | C7   | - | 373.14 | 374.1450 | - |
| 164 | Ald-C8   | C8   | - | 415.19 | 416.1840 | - |
| 165 | Ald-C9   | C9   | - | 417.15 | -        | - |
| 166 | Ald-C10  | C10  | - | 417.13 | 418.1320 | - |
| 167 | Ald-C11  | C11  | - | 443.22 | 444.2150 | - |
| 168 | Ald-C12  | C12  | - | 415.15 | -        | - |
| 169 | Ald-D1   | D1   | - | 445.14 | 446.1320 | - |
| 170 | Ald-D2   | D2   | - | 399.17 | -        | - |
| 171 | Ald-D3   | D3   | - | 447.16 | -        | - |
| 172 | Ald-D4   | D4   | - | 409.16 | 410.1510 | - |
| 173 | Ald-SA1  | SA1  | - | 437.10 | 438.1056 | - |
| 174 | Ald-SA2  | SA2  | - | 471.12 | 472.1228 | - |
| 175 | Ald-SA3  | SA3  | - | 429.05 | 430.0572 | - |
| 176 | Ald-SA4  | SA4  | - | 435.01 | 436.0099 | - |
| 177 | Ald-SA5  | SA5  | - | 409.11 | 410.1061 | - |
| 178 | Ald-SA6  | SA6  | - | 431.07 | 432.0739 | - |
| 179 | Ald-SA7  | SA7  | - | 431.07 | 432.0750 | - |
| 180 | Ald-SA8  | SA8  | - | 423.12 | 424.1260 | - |
| 181 | Ald-SA9  | SA9  | - | 413.08 | 414.0850 | - |
| 182 | Ald-SA10 | SA10 | - | 413.08 | 414.0860 | - |
| 183 | Ald-SA11 | SA11 | - | 413.08 | 414.0830 | - |
| 184 | Ald-SA12 | SA12 | - | 427.10 | 428.0990 | - |
| 185 | Ald-SB1  | SB1  | - | 427.10 | 428.0955 | - |

|     |          |      |   |        |          |   |
|-----|----------|------|---|--------|----------|---|
| 186 | Ald-SB2  | SB2  | - | 487.14 | 438.1403 | - |
| 187 | Ald-SB3  | SB3  | - | 425.10 | 425.1000 | - |
| 188 | Ald-SB5  | SB5  | - | 445.11 | 446.1185 | - |
| 189 | Ald-SB6  | SB6  | - | 445.11 | 446.1162 | - |
| 190 | Ald-SB7  | SB7  | - | 440.08 | 441.0760 | - |
| 191 | Ald-SB8  | SB8  | - | 440.08 | 441.0700 | - |
| 192 | Ald-SB9  | SB9  | - | 451.18 | -        | - |
| 193 | Ald-SB10 | SB10 | - | 401.07 | -        | - |
| 194 | Ald-SB11 | SB11 | - | 409.11 | 410.1100 | - |
| 195 | Ald-SB12 | SB12 | - | 393.11 | -        | - |
| 196 | Ald-SC1  | SC1  | - | 389.13 | 390.1410 | - |
| 197 | Ald-SC2  | SC2  | - | 455.07 | 456.0900 | - |
| 198 | Ald-SC3  | SC3  | - | 439.08 | N.D.     | - |

\* Excluding the peak generated from excessive azide used

"-" = No characterizations (LCMS/NMR) were done

"N.D." = Although the product is correct, the molecular mass did not show up in the mass spectrometry (due to low ionization)

## 2. LC-MS profiles of “Click” inhibitors

### 2.1 LC-MS profiles of benzyl vinyl sulfone inhibitors (17)

All conditions are based on:

0 – 10 min: 20% B (1% TFA in ACN) → 80% B

10 – 15 min: 80% B (1% TFA in ACN) → 100% B

15 – 17 min: 100% B

(\*) Starting materials; (Arrowed) desired product.

VSB-warhead:

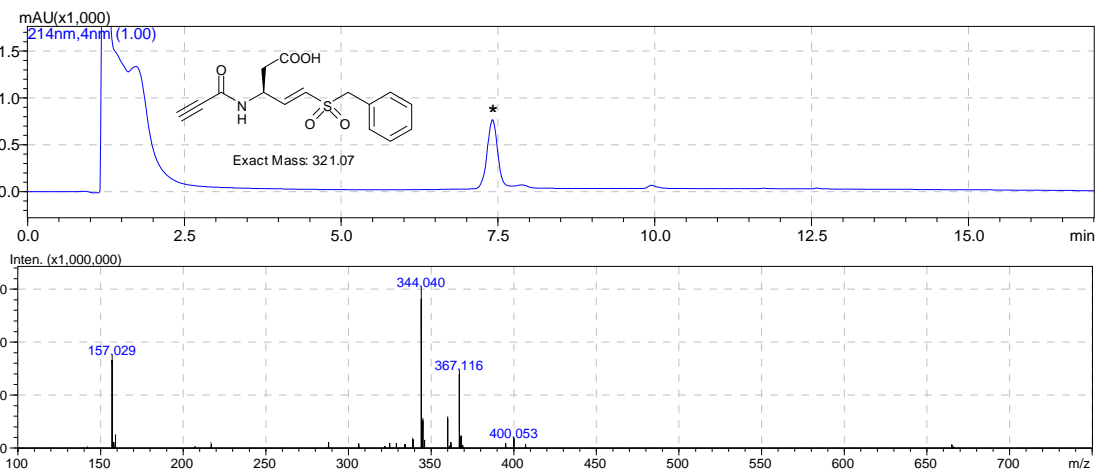

VSB-A1:

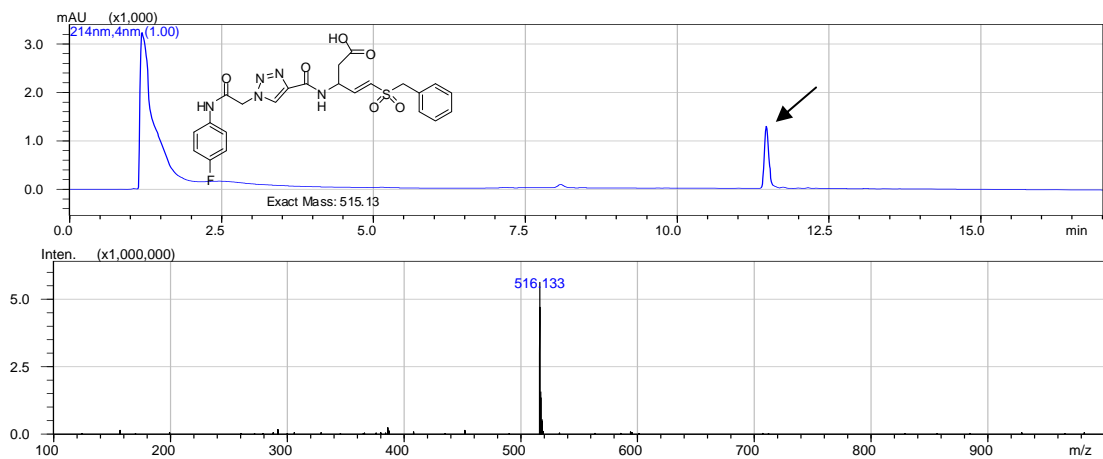

VSB-A2:

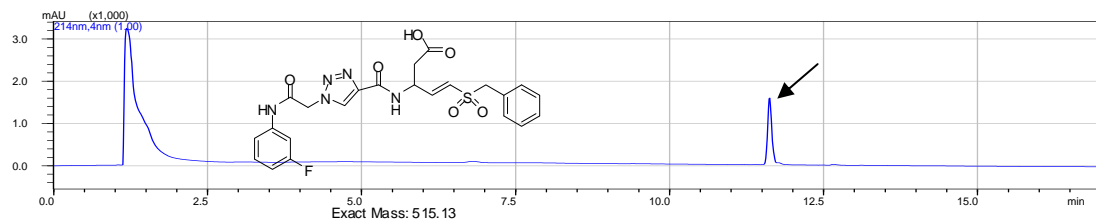

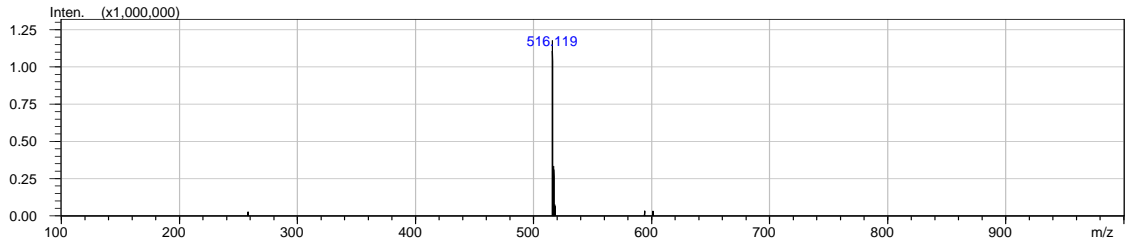

VSB-A3:

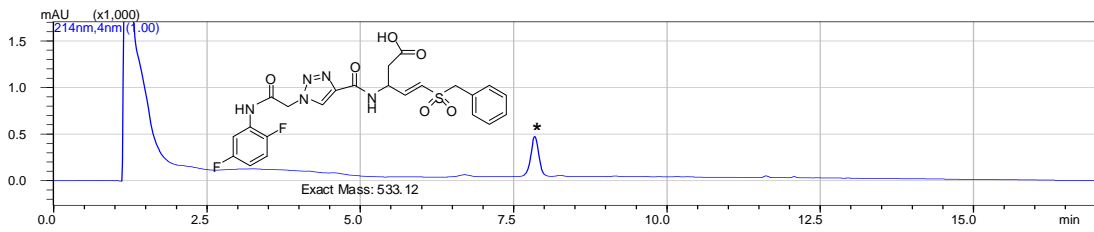

VSB-A4:

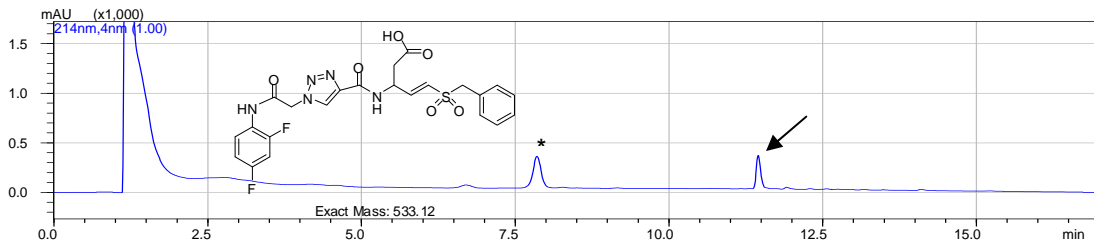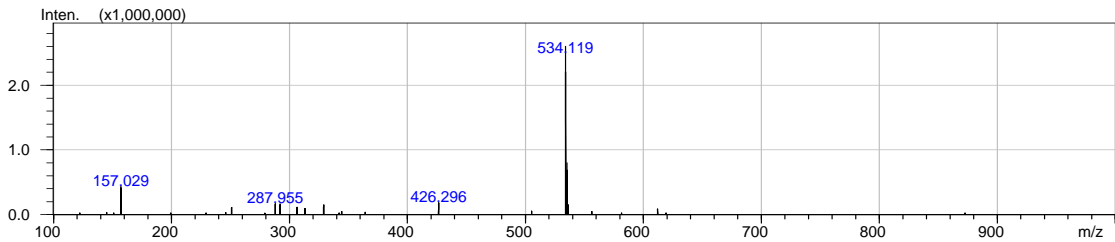

VSB-A5:

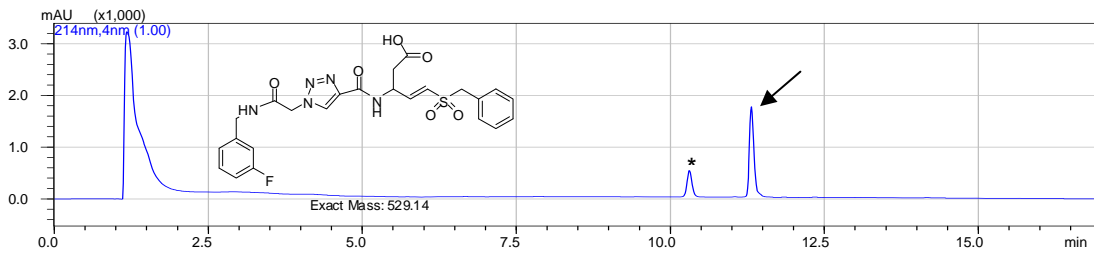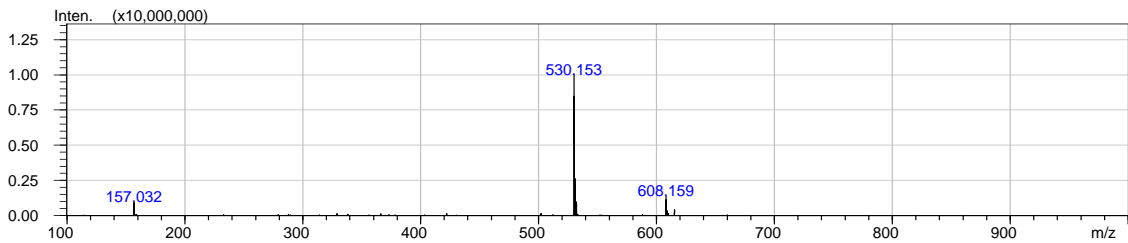



VSB-A6:

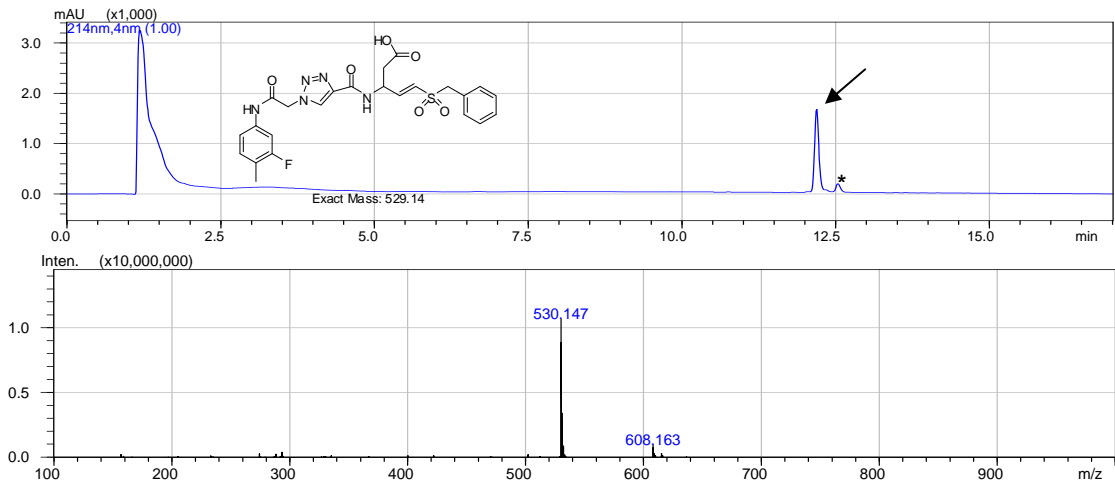

VSB-A7:

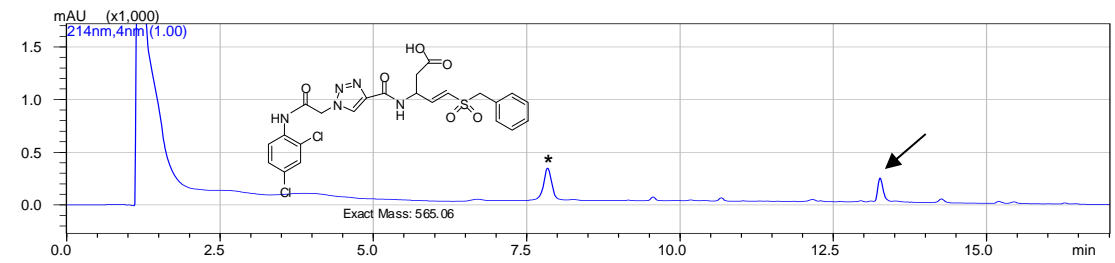

VSB-A8:

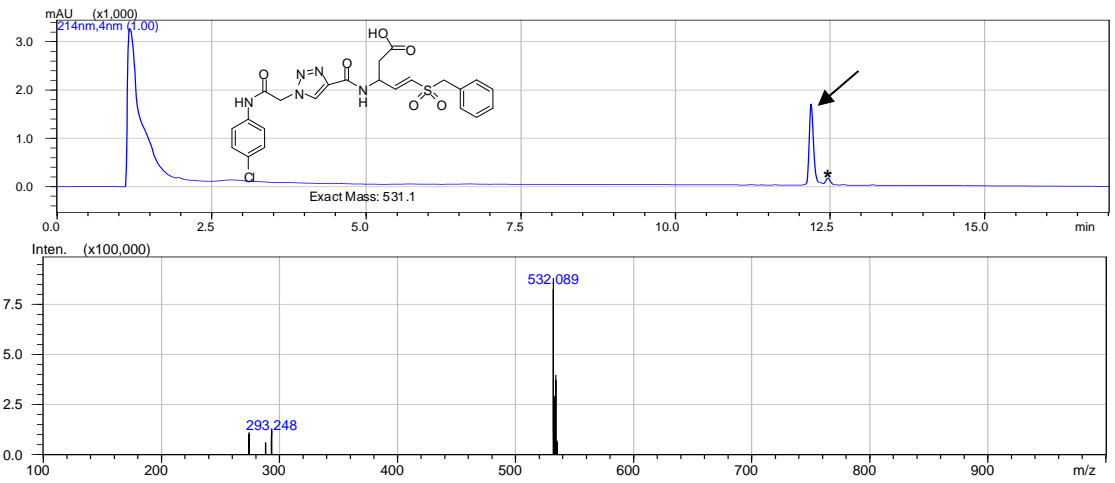

VSB-A9:

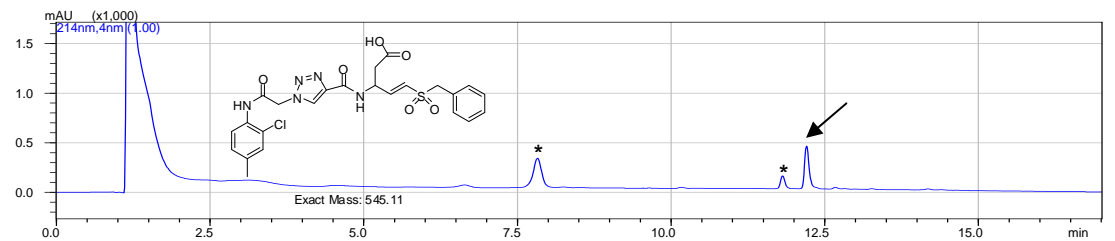

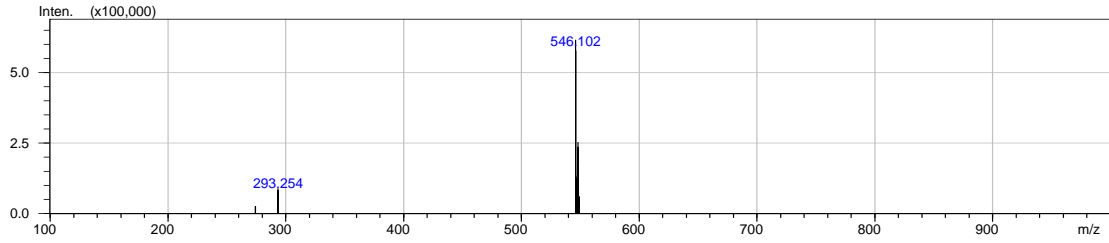

VSB-A10:

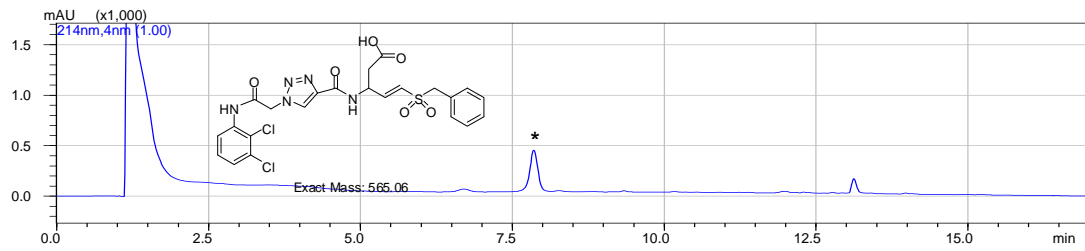

VSB-A11:

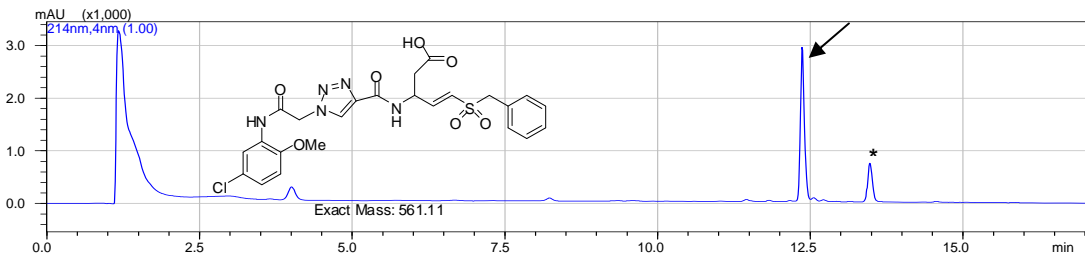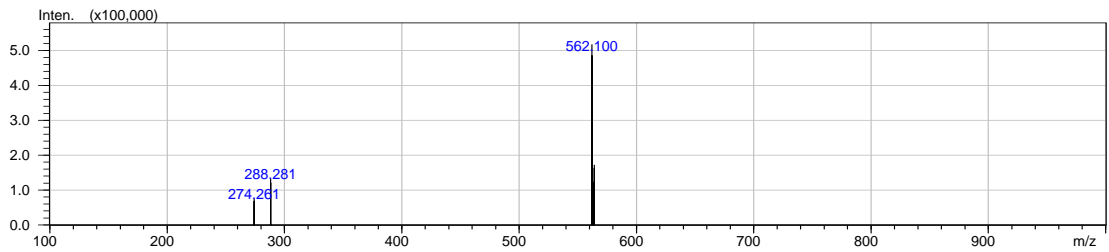

VSB-A12:

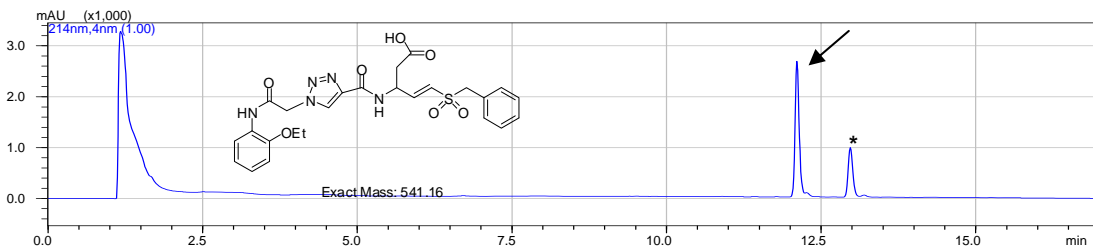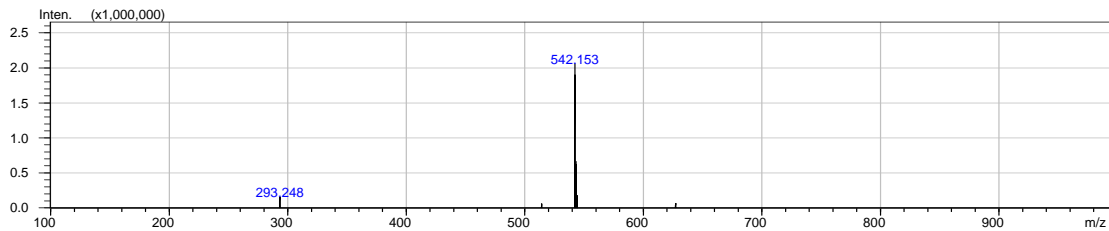

VS-B1:

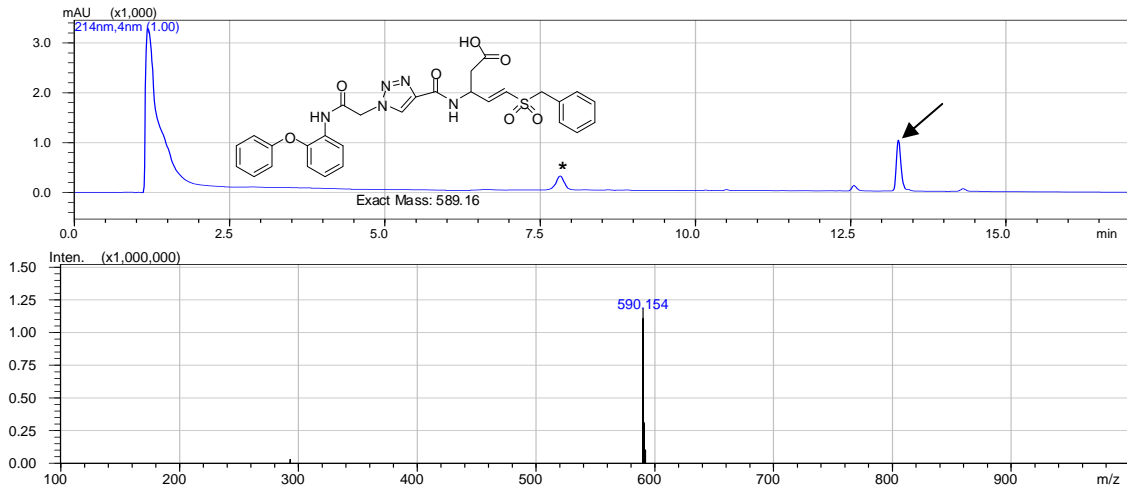

VS-B2:

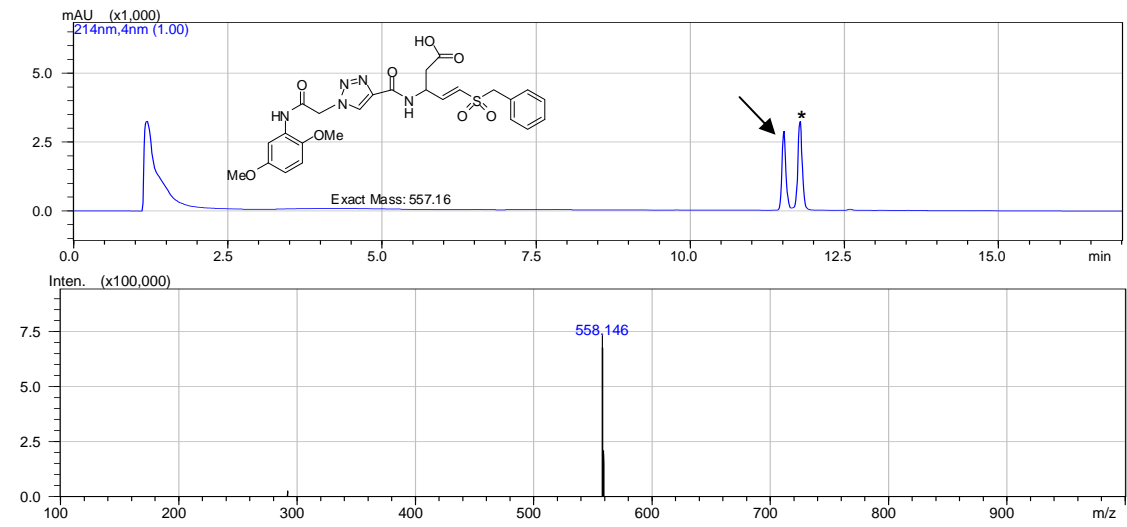

VS-B3:

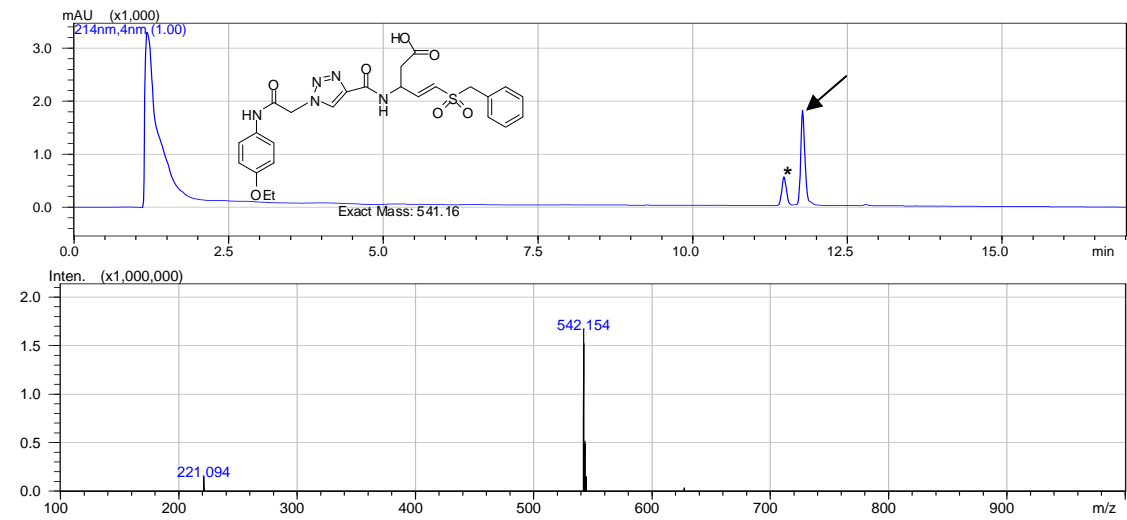

VS-B4:

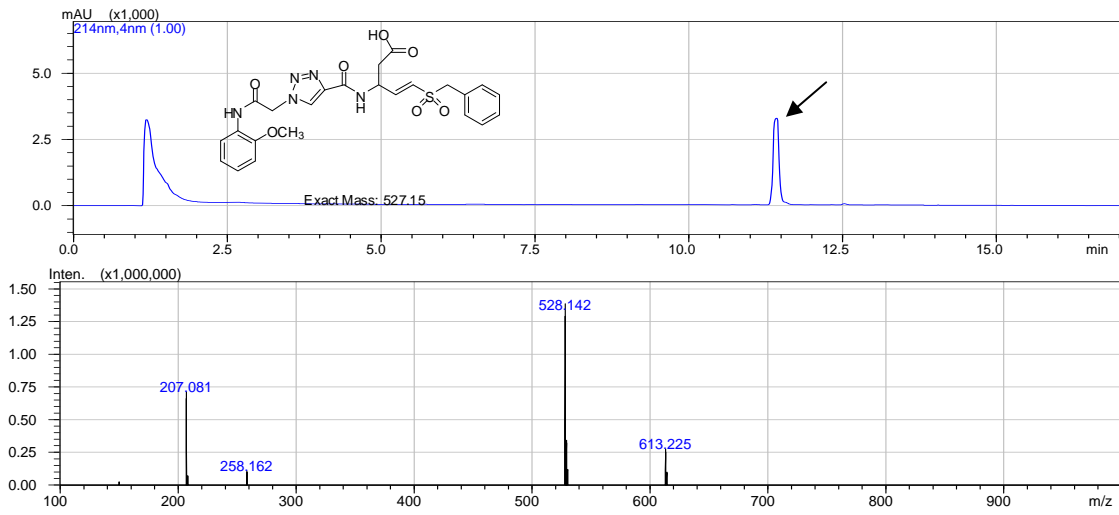

VS-B5:

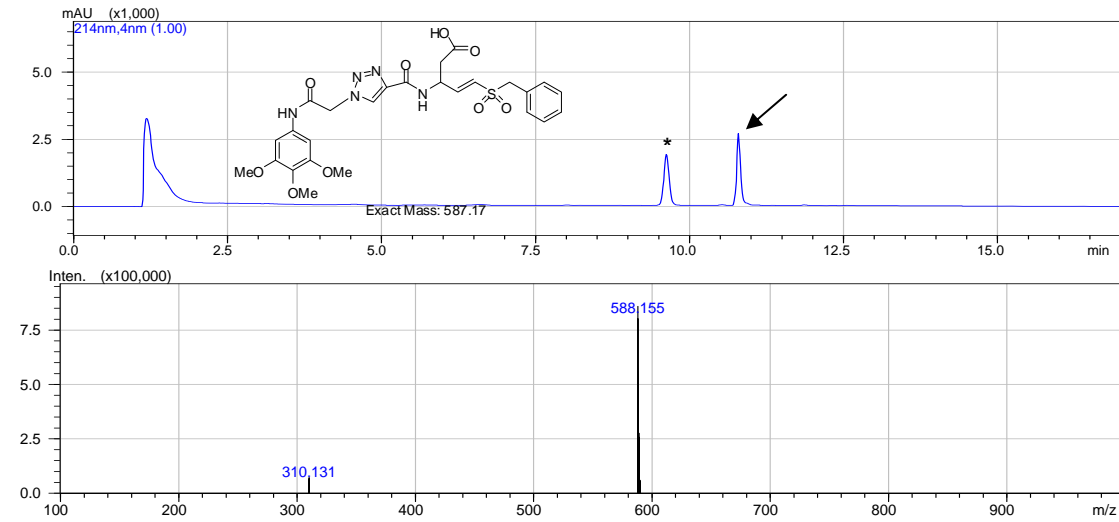

VS-B6:

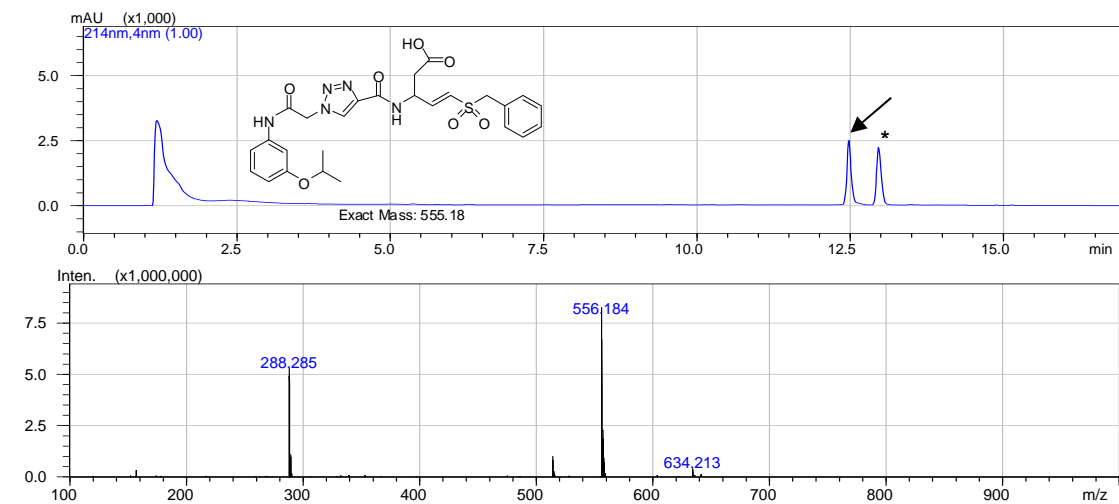

VSB-B7:

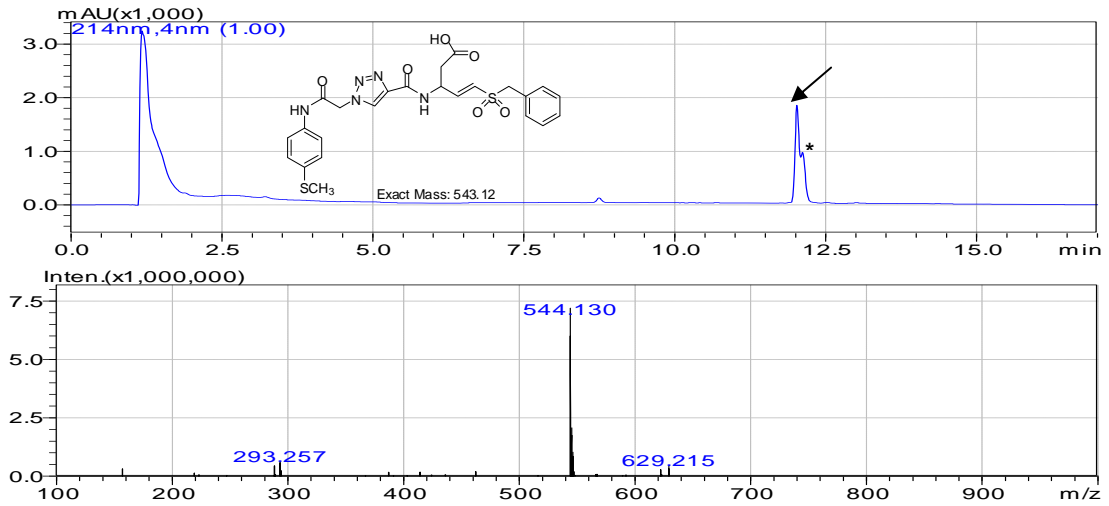

VSB-B8:

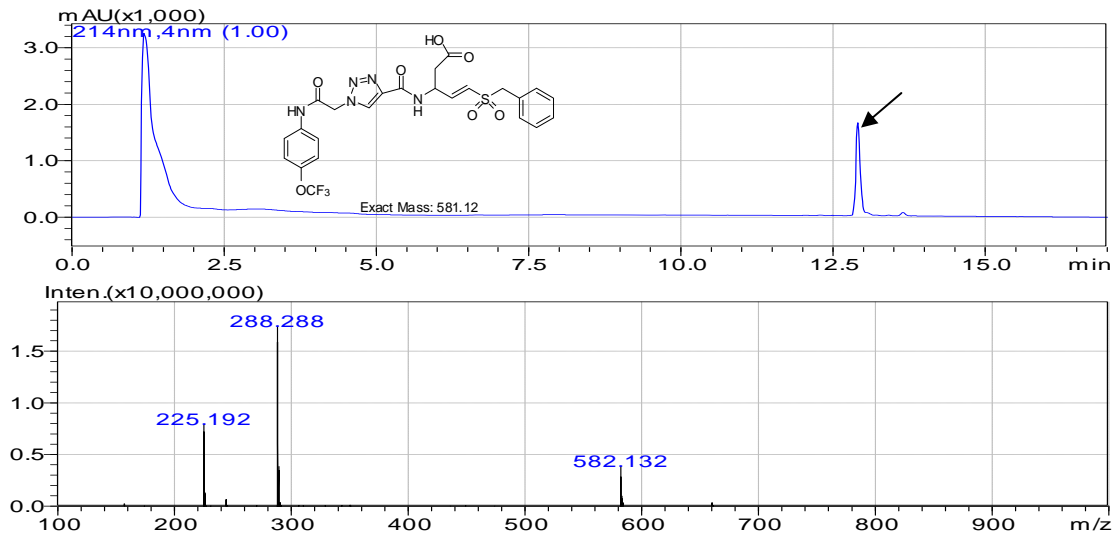

VSB-B9:

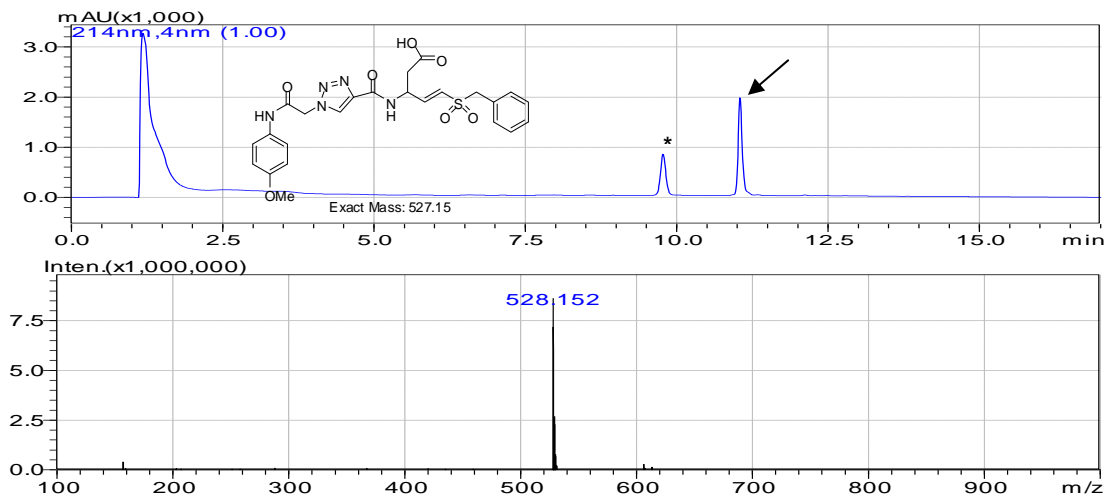

VSB-BB10:

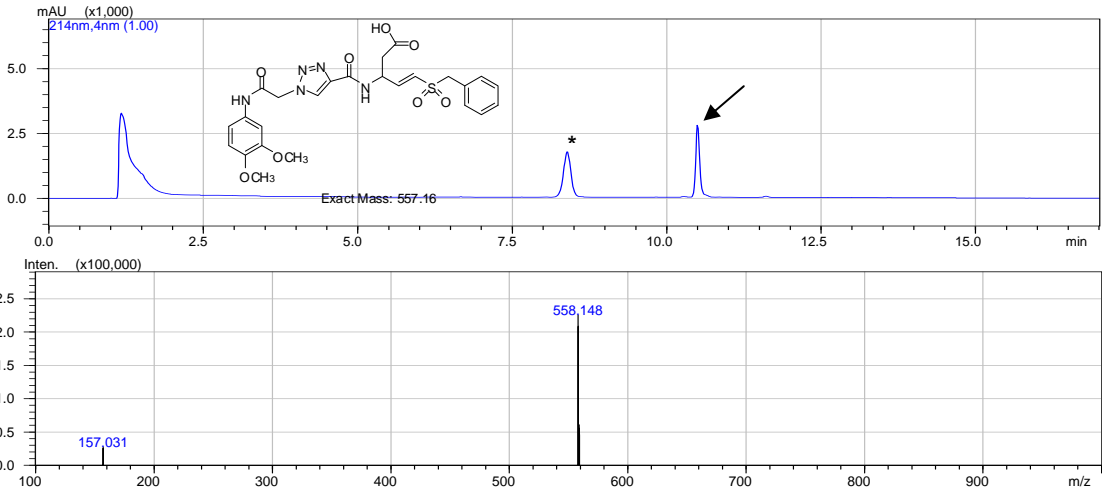

VSB-B11:

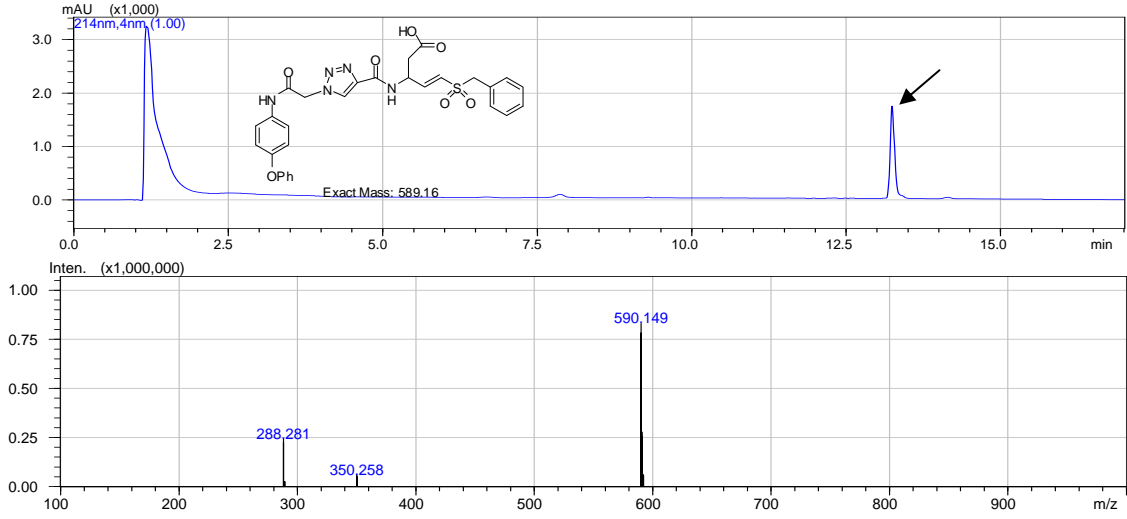

VSB-BB12:

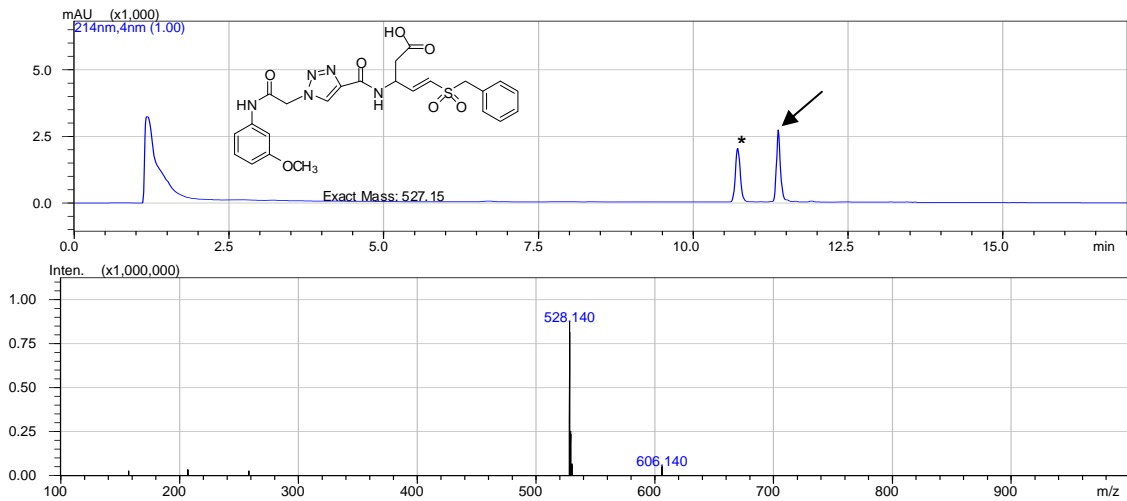

VSB-C1:

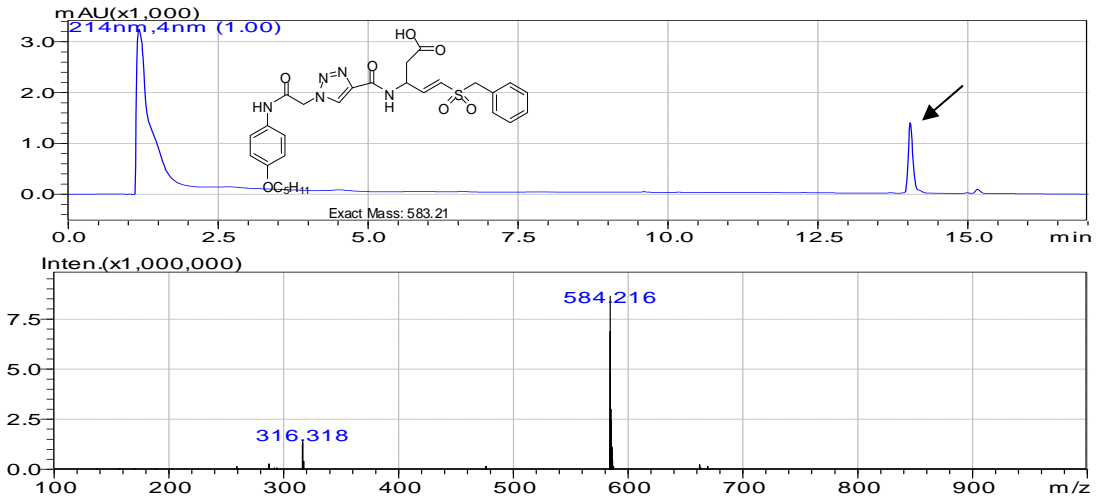

VSB-C2:

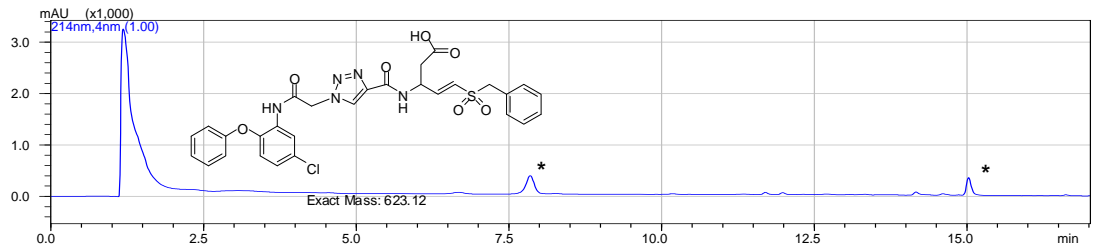

VSB-C3:

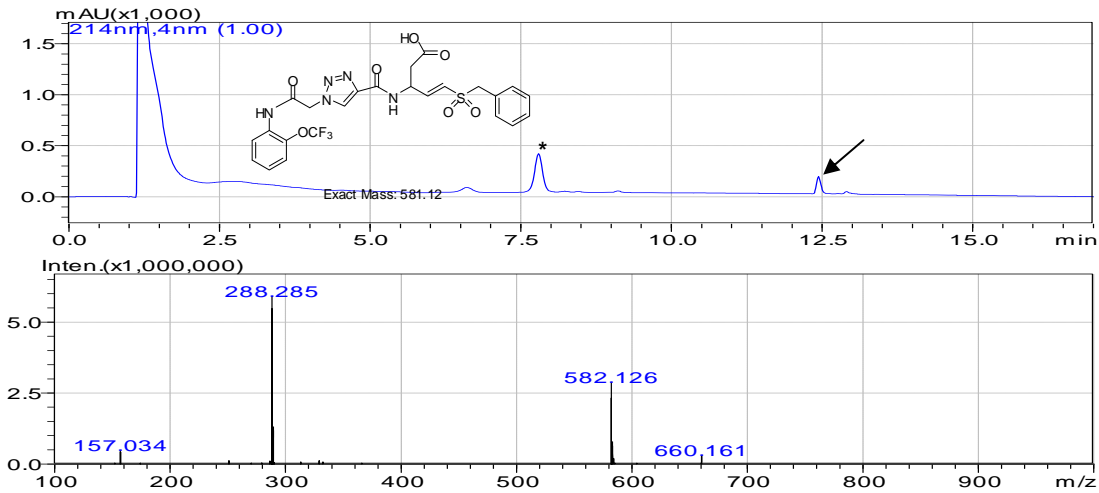

VSB-C4:

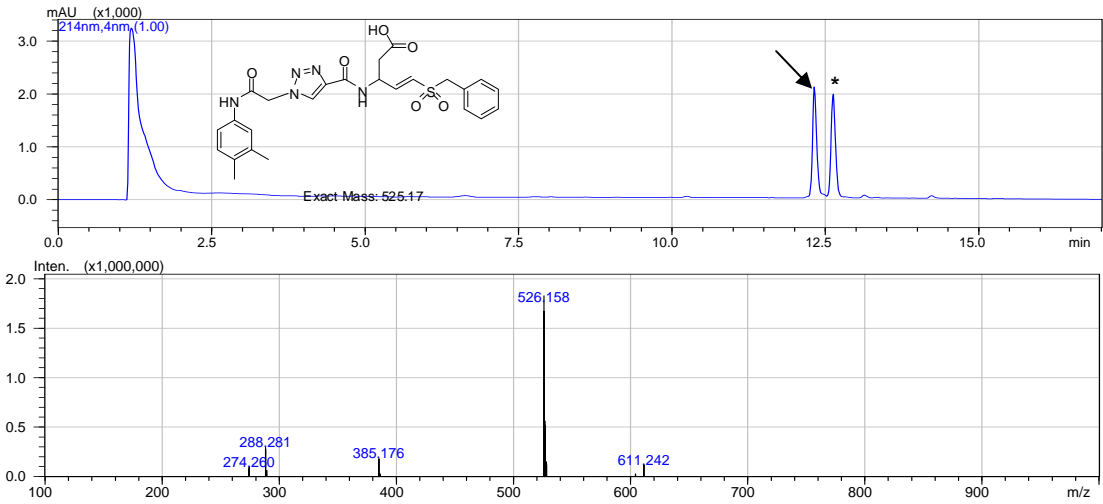

VSB-C5:

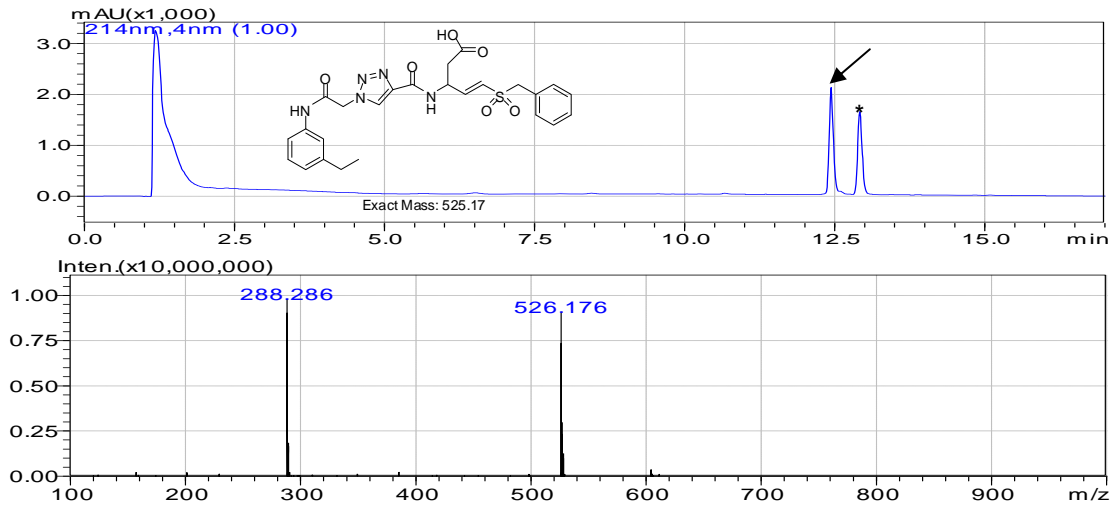

VSB-C6:

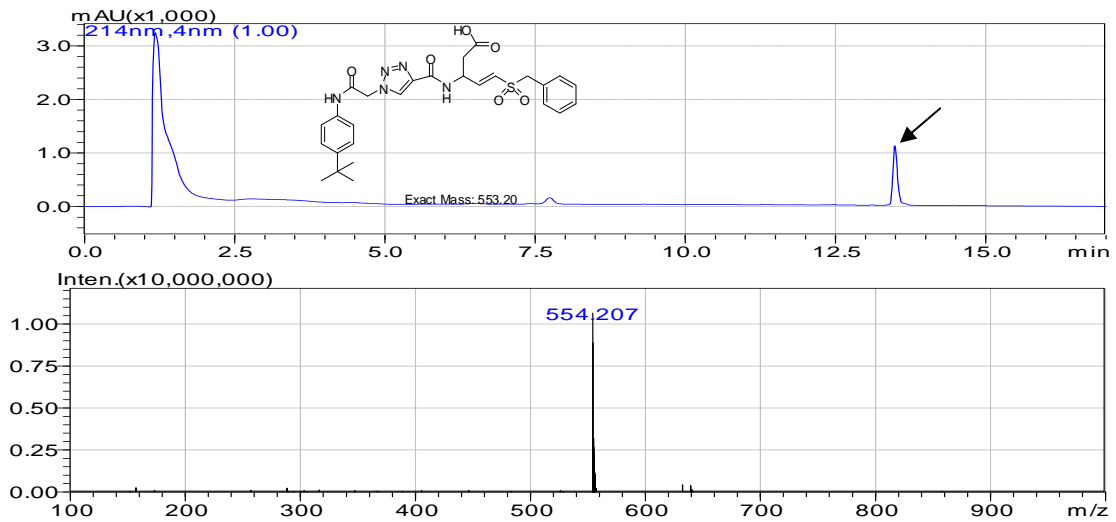



VSB-C7:

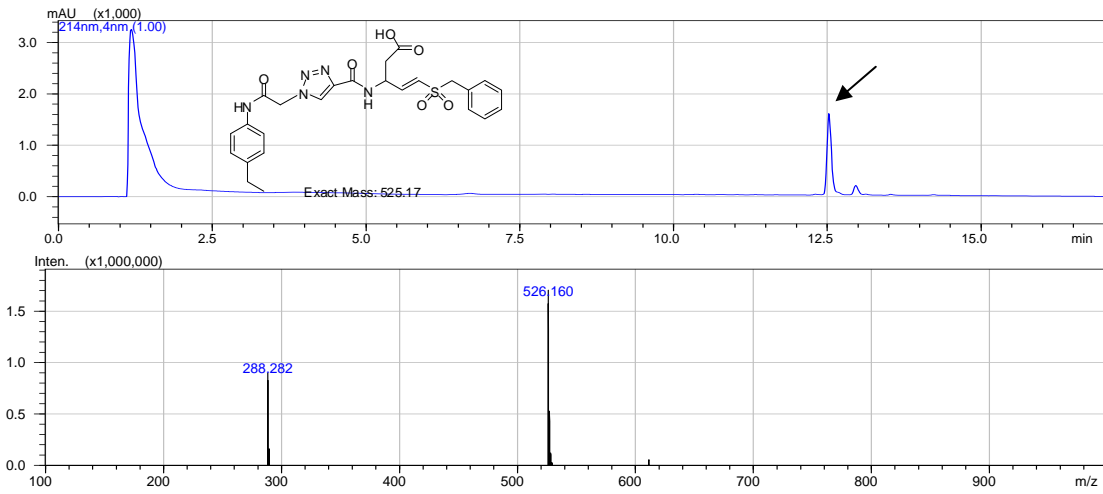

VSB-C8:

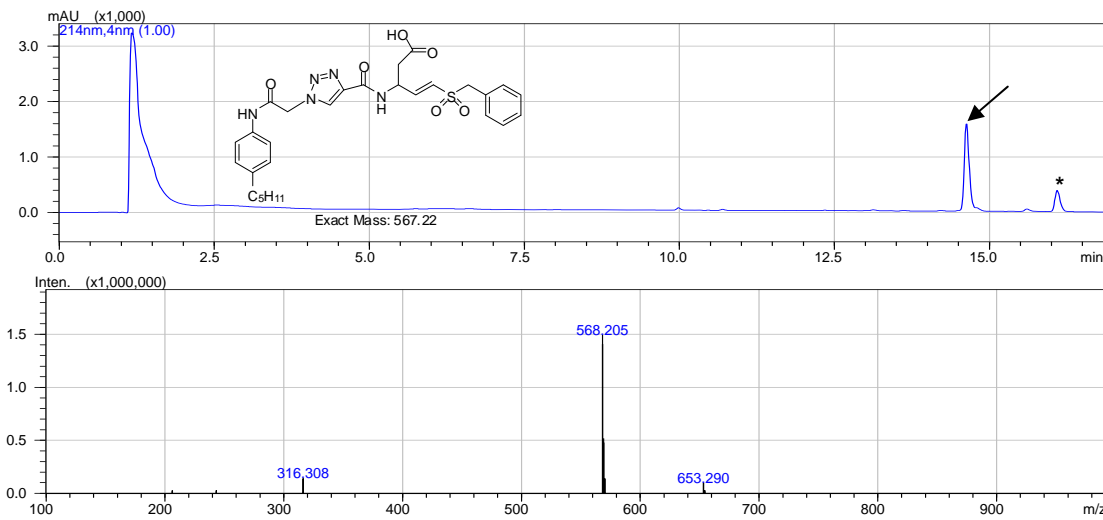

VSB-C9:

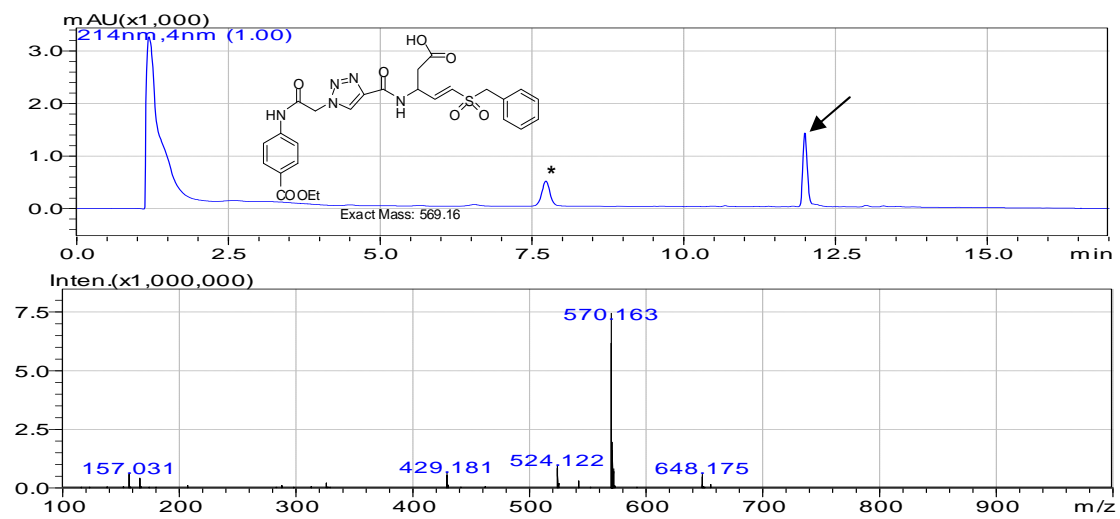

VSB-C10:

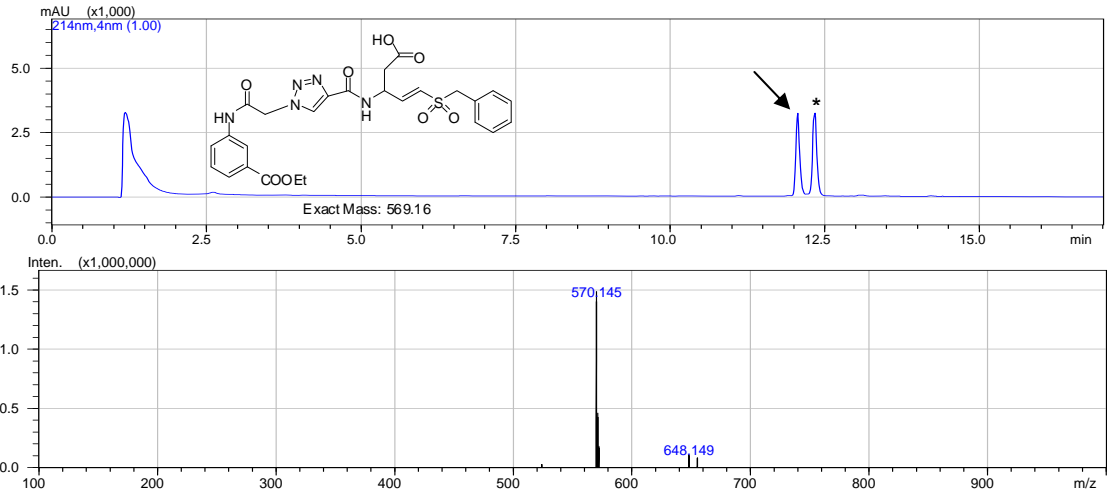

VSB-C11:

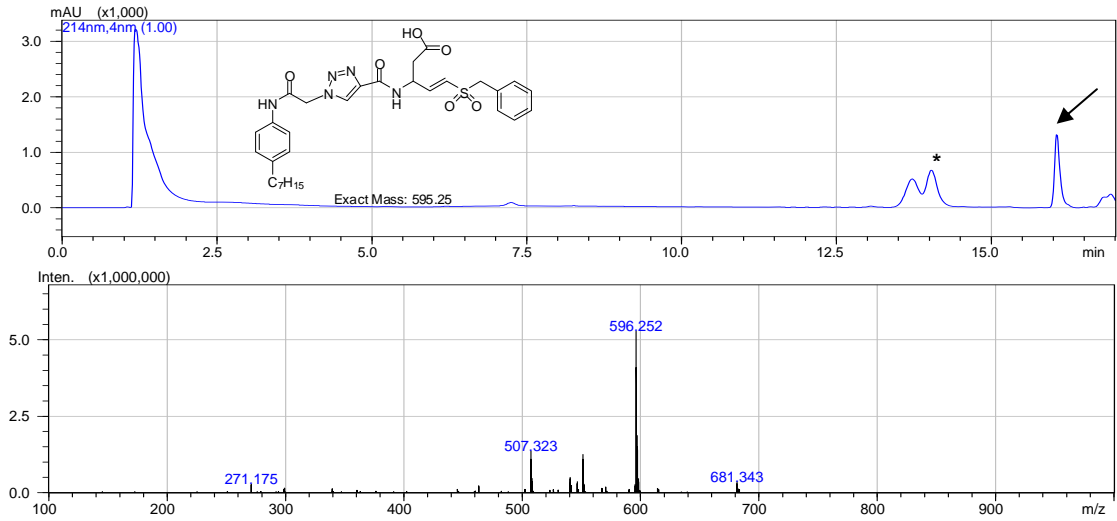

VSB-C12:

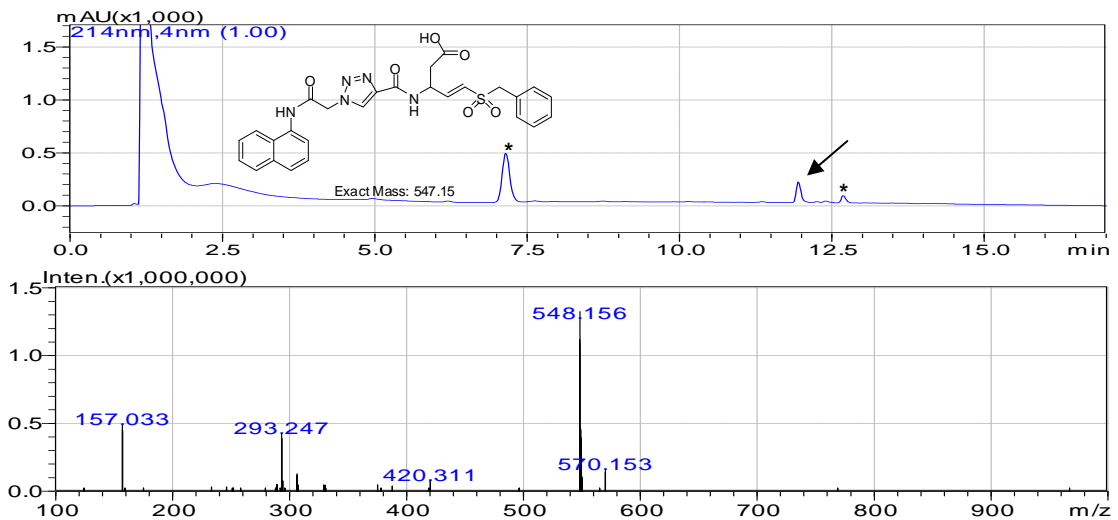

VSB-D1:

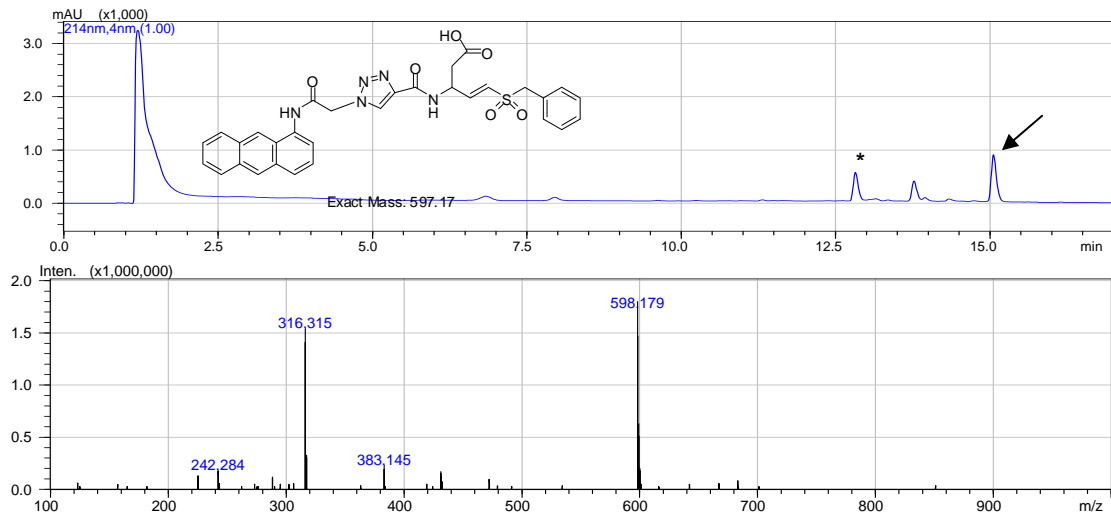

VSB-D2:

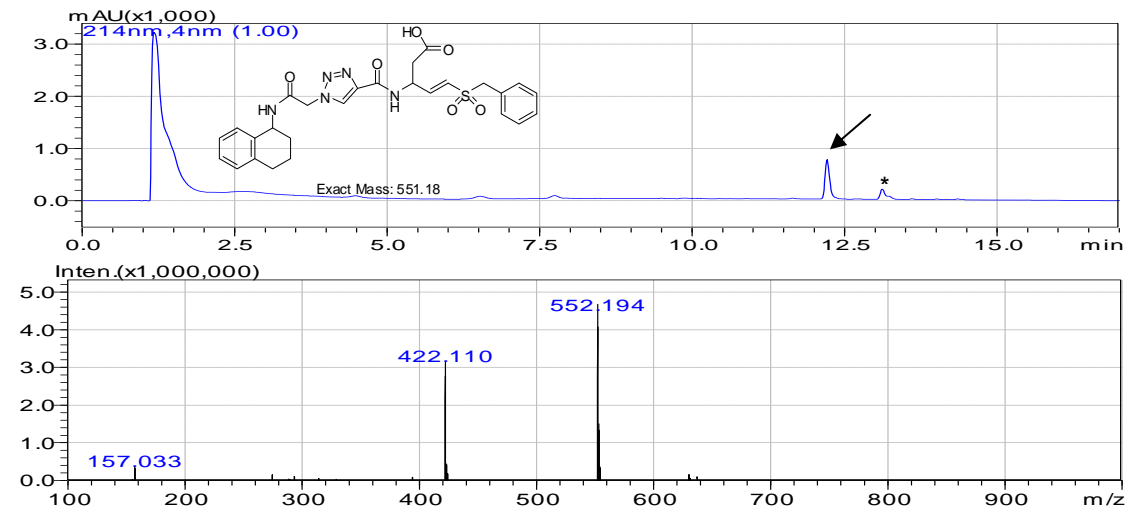

VSB-D3:

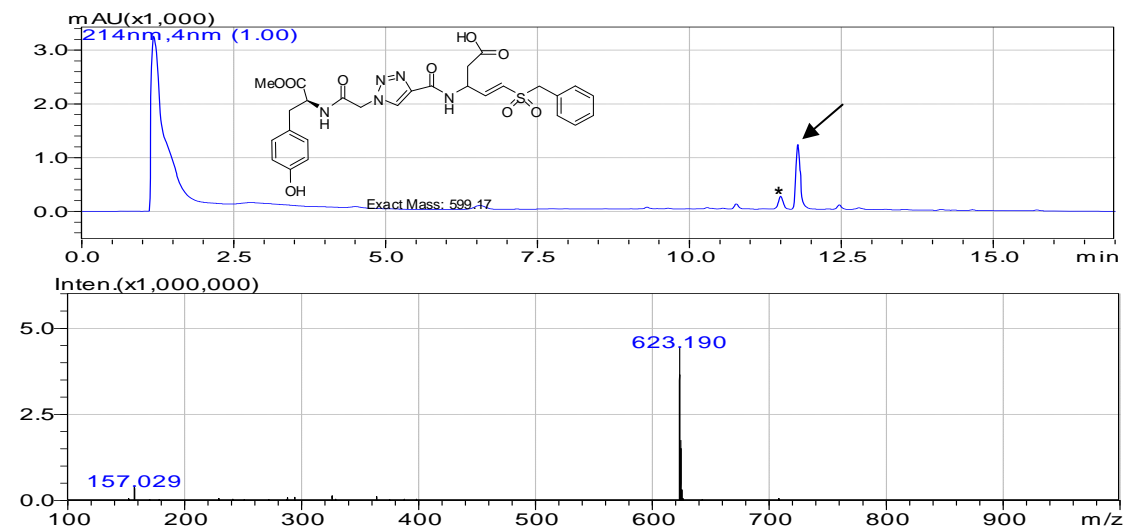

VSB-D4:

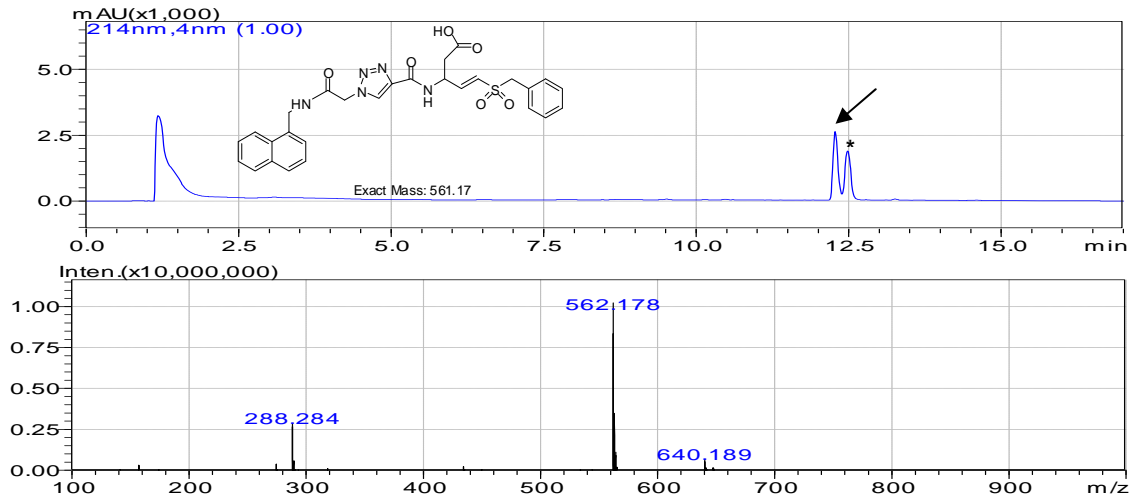

VSB-SA1:

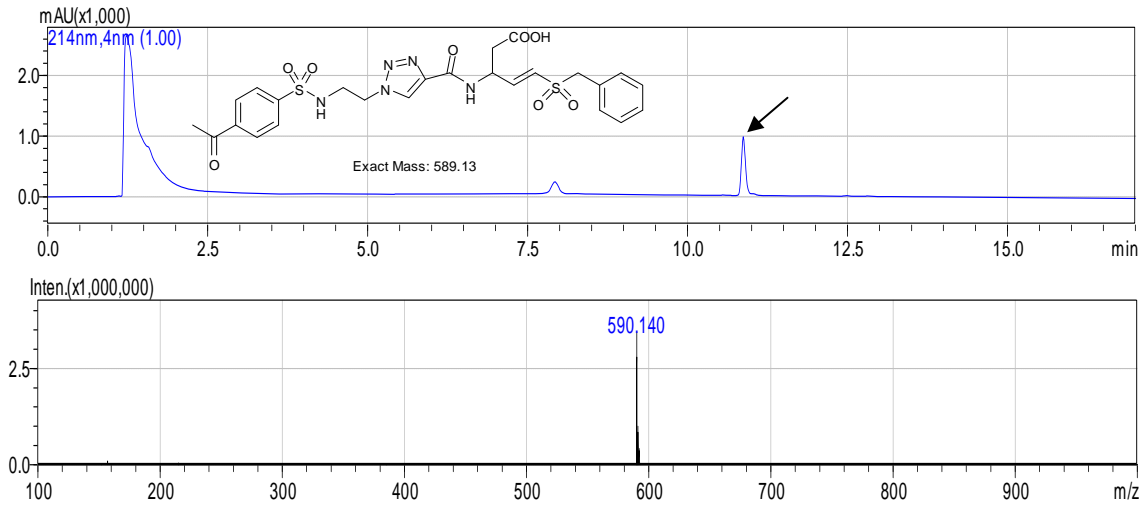

VSB-SA2:

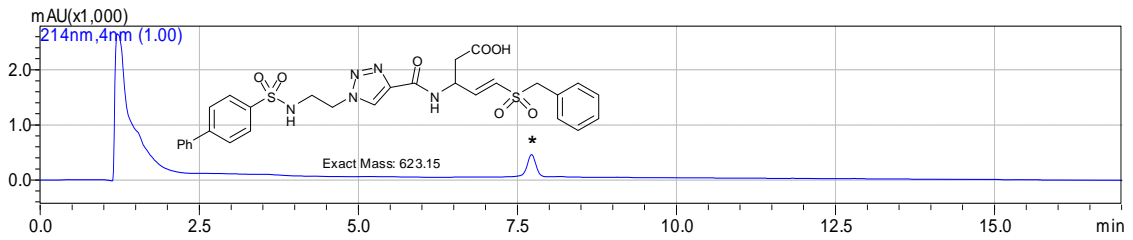

VSB-SA3:

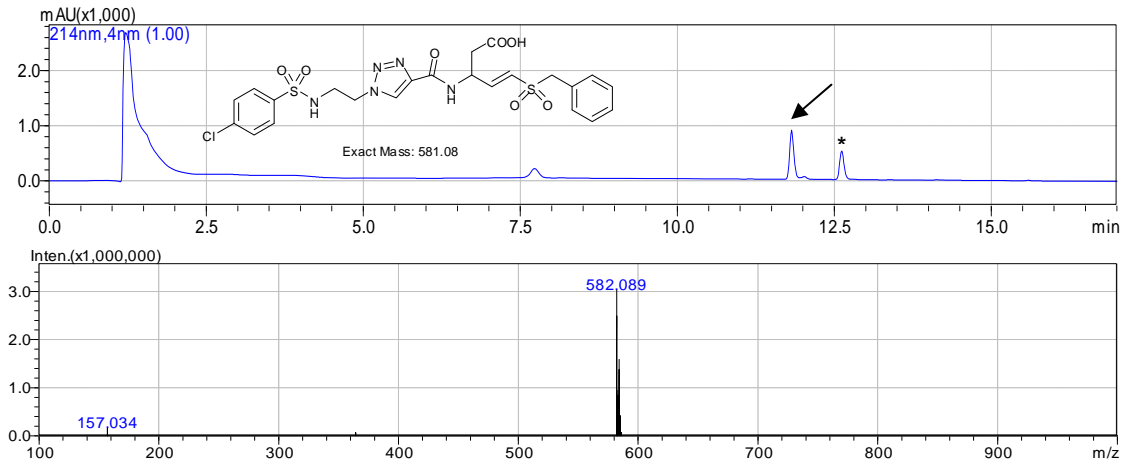

VSB-SA4:

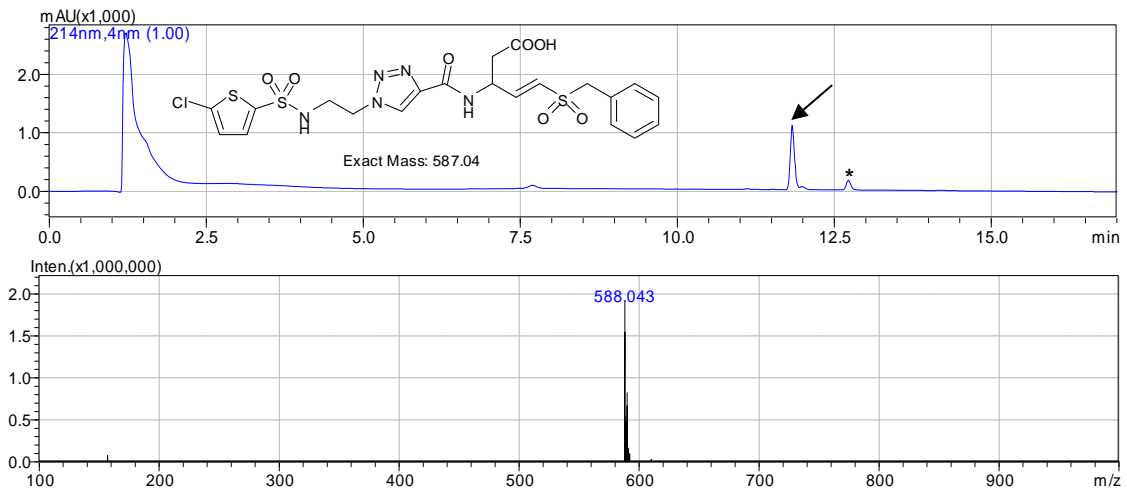

VSB-SA5:

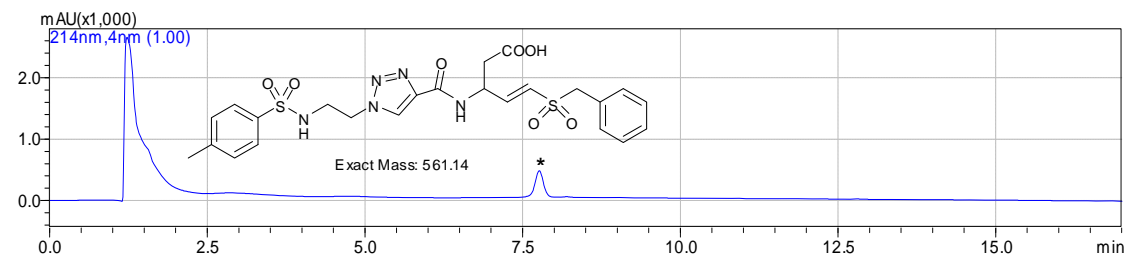

VSB-SA6:

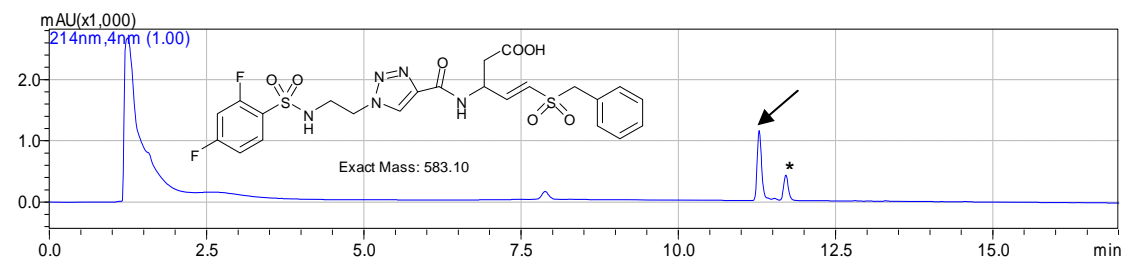

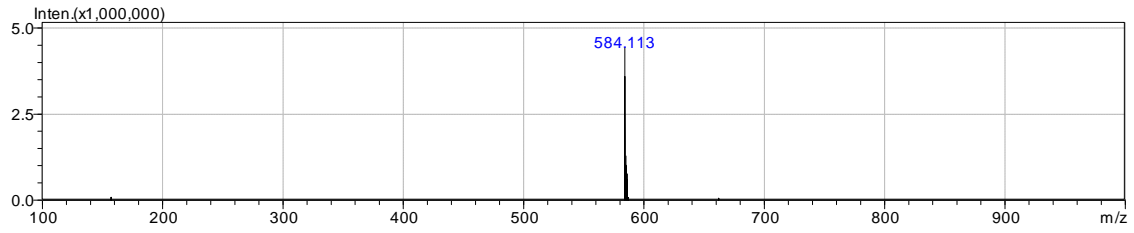

VSB-SA7:

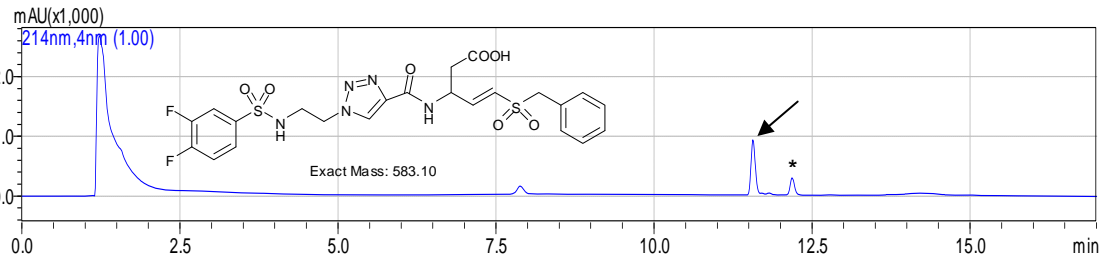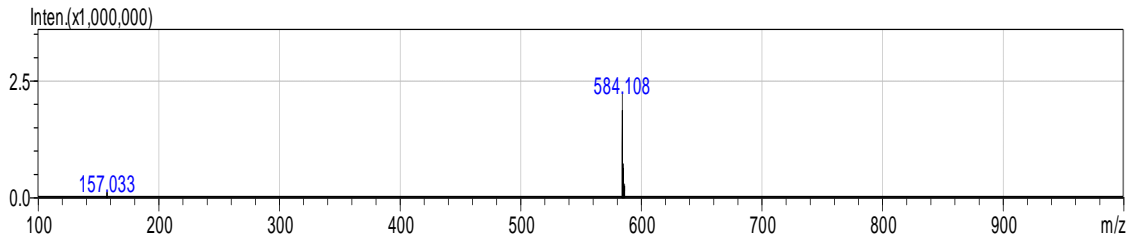

VSB-SA8:

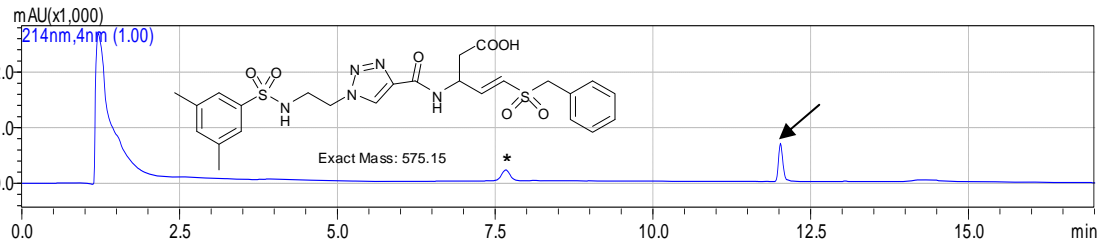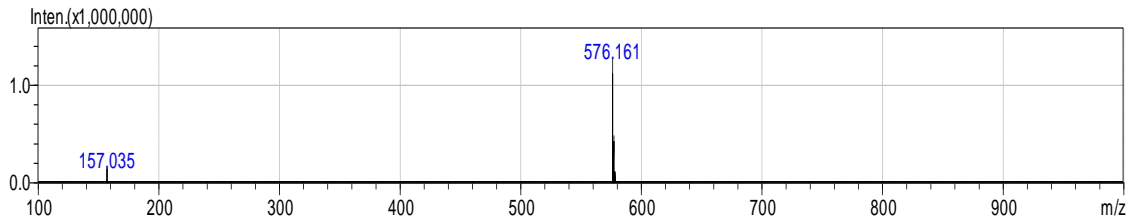

VSB-SA9:

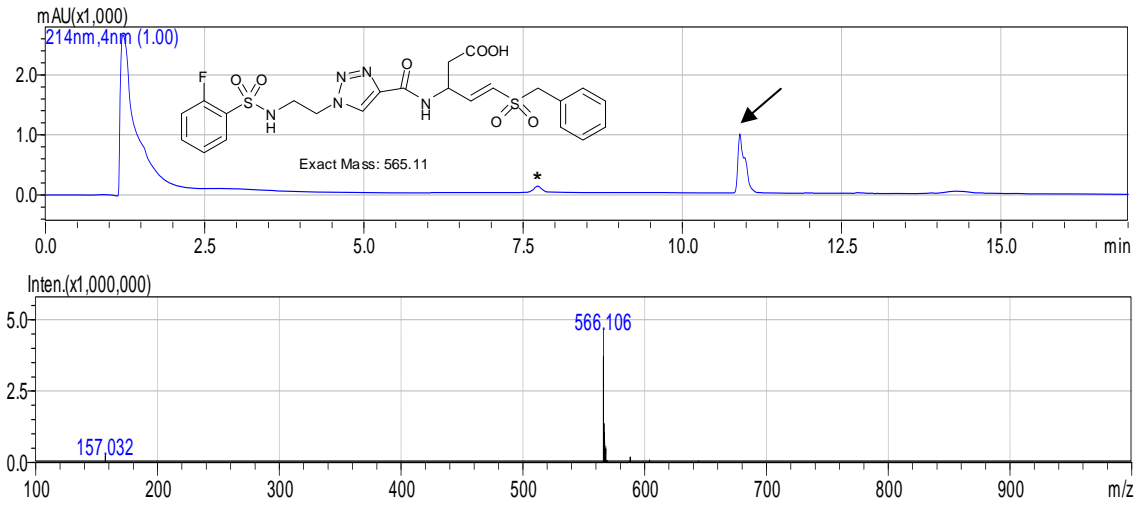

VSB-SA10:

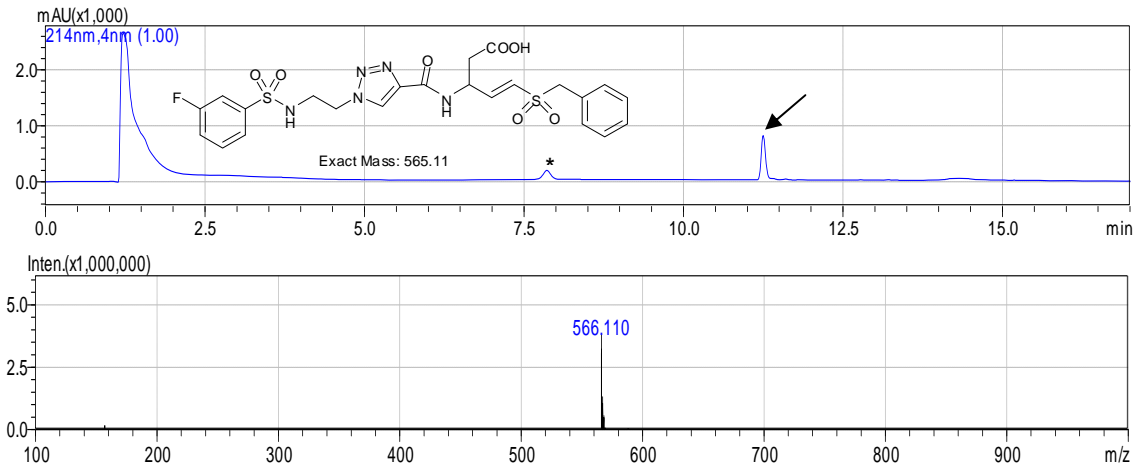

VSB-SA11:

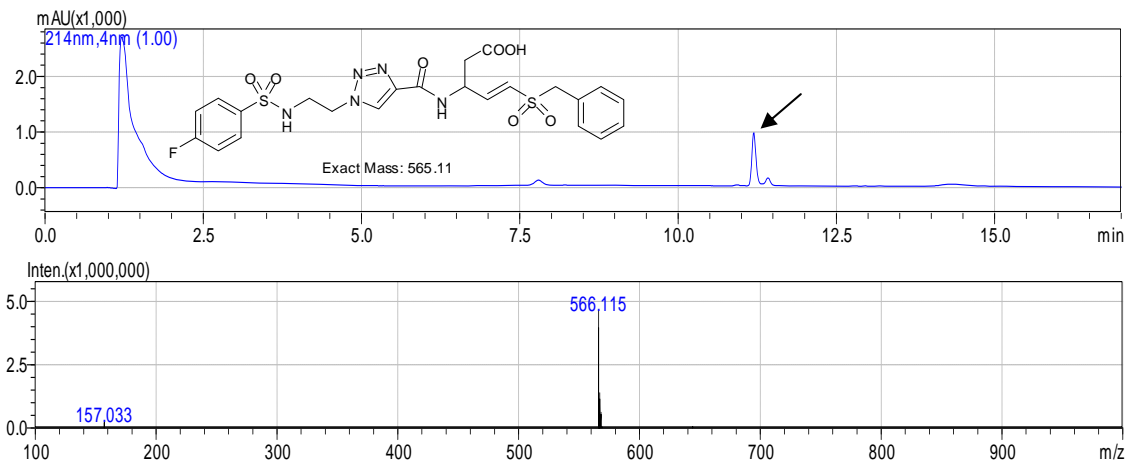

VSBSA12:

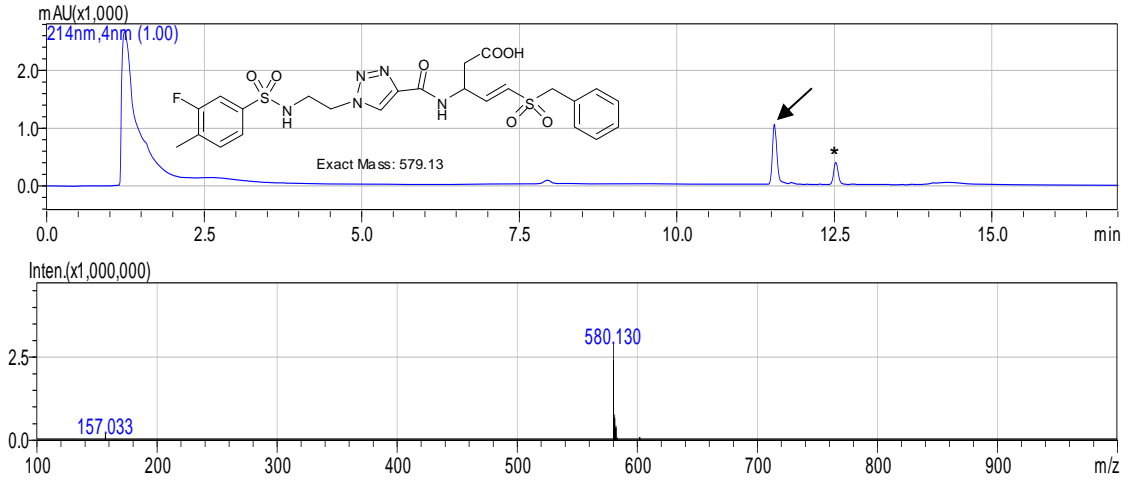

VSBSB1:

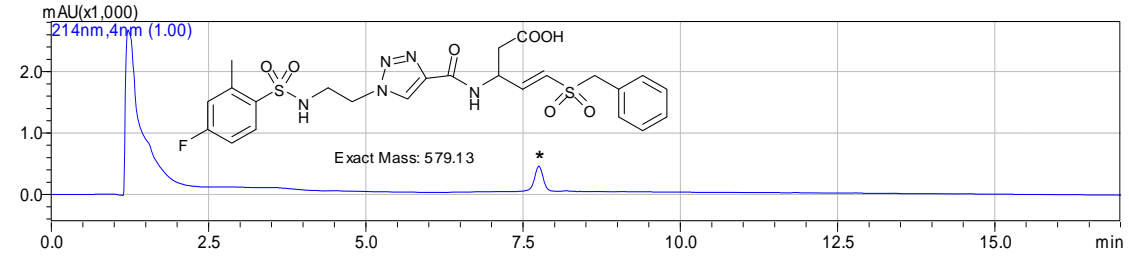

VSBSB2:

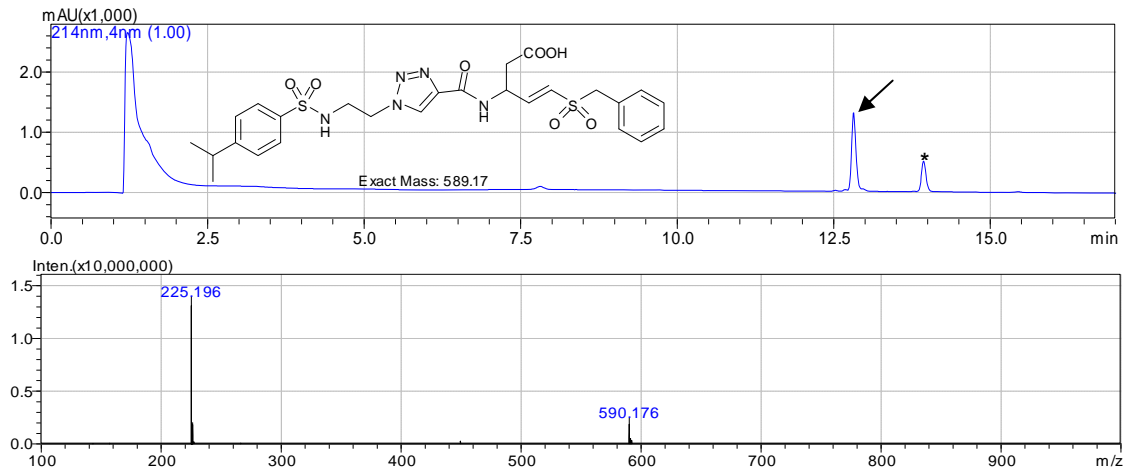

VSBSB3:

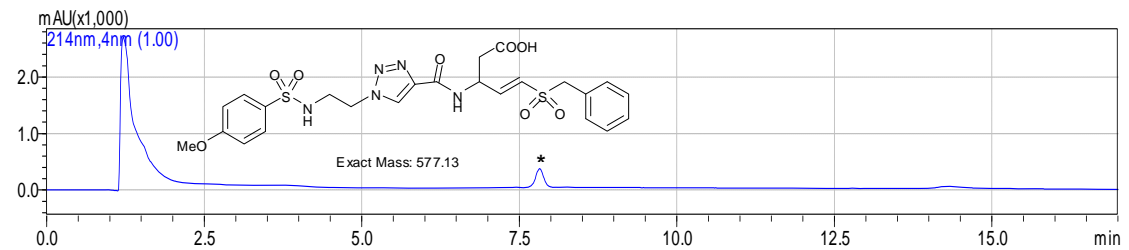



VSBSB5:

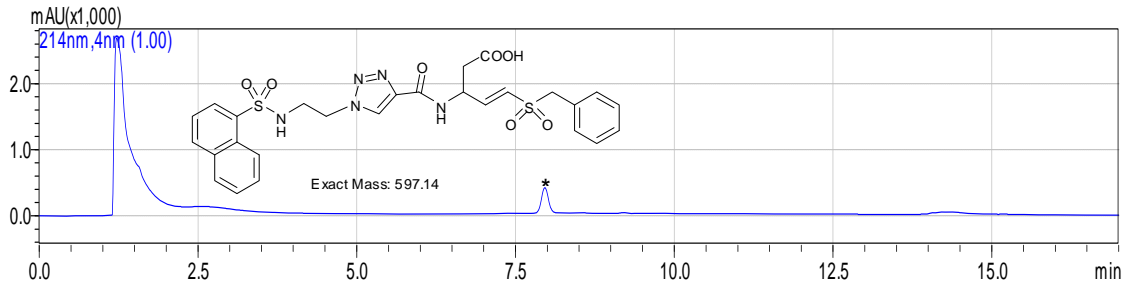

VSBSB6:

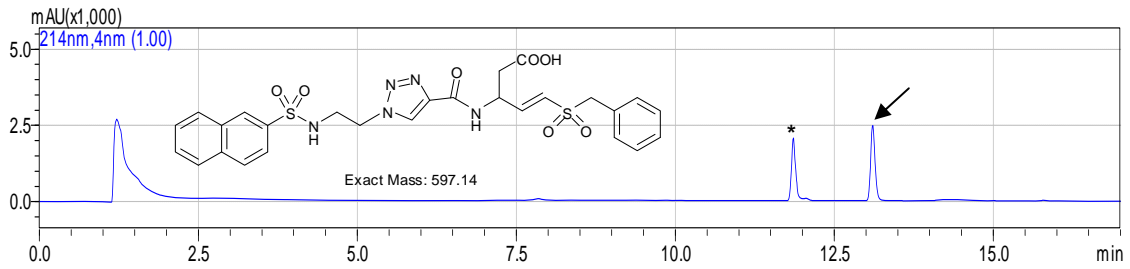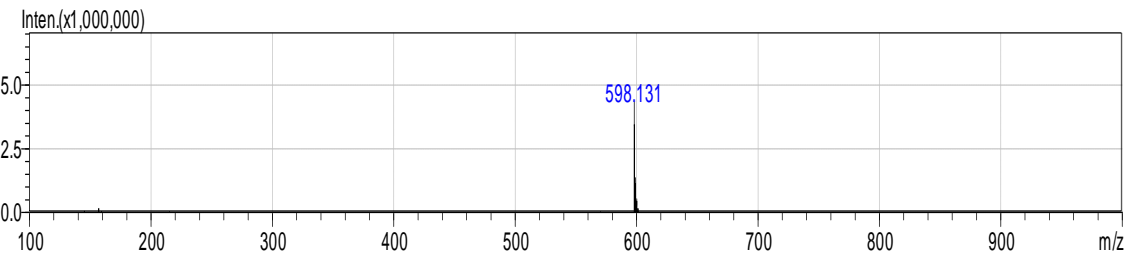

VSBSB7:

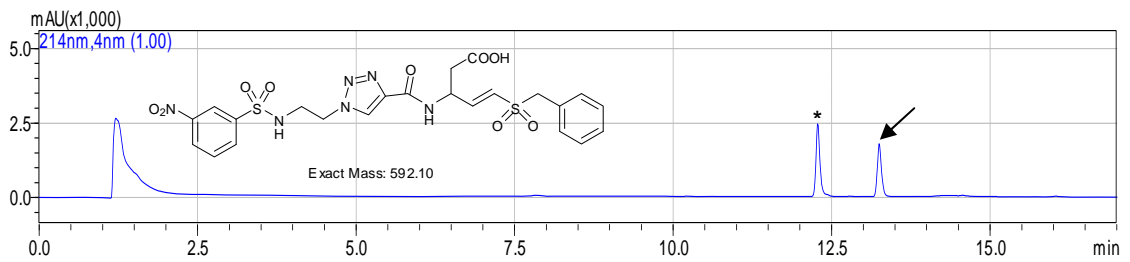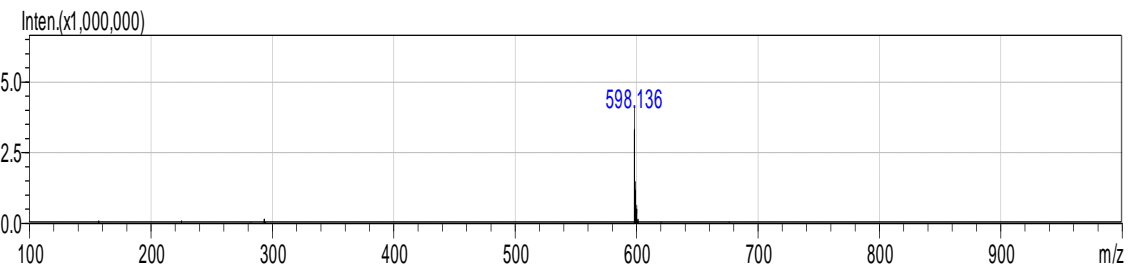

VSB-SB8:

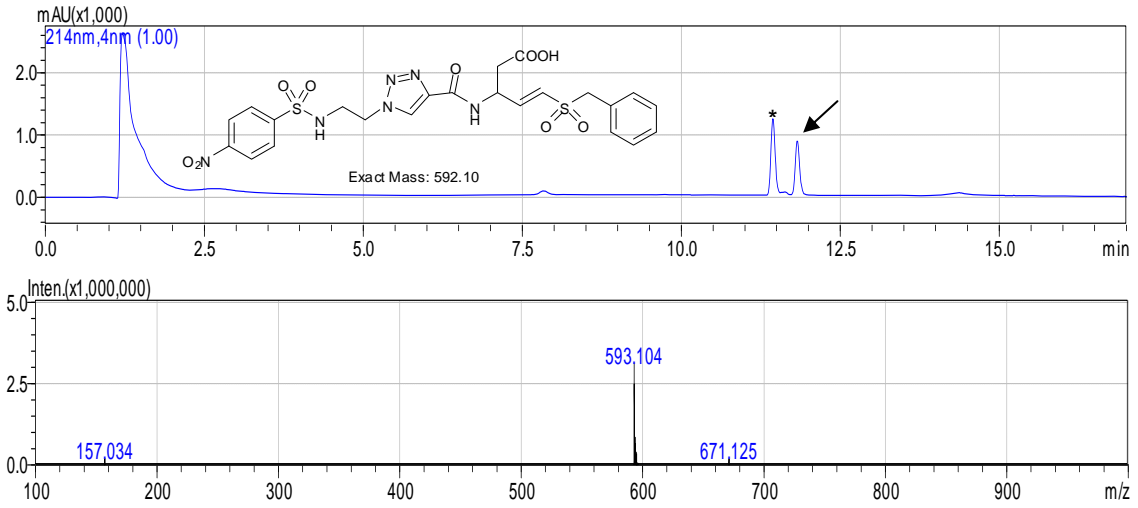

VSB-SB9:

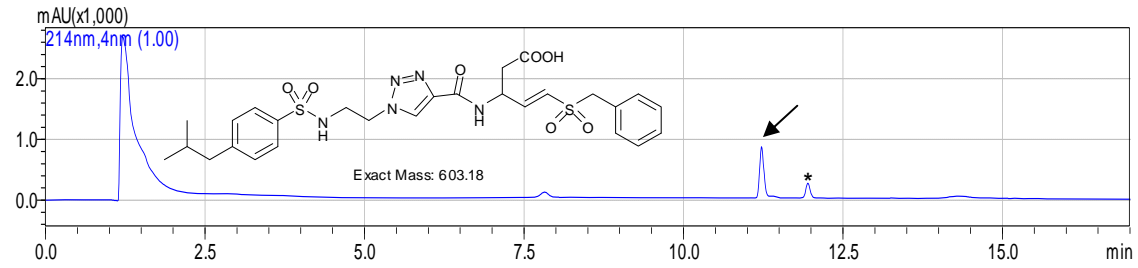

VSB-SB10:

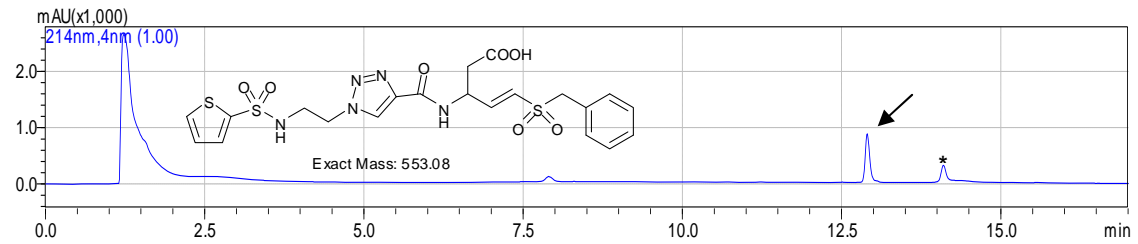

VSB-SB11:

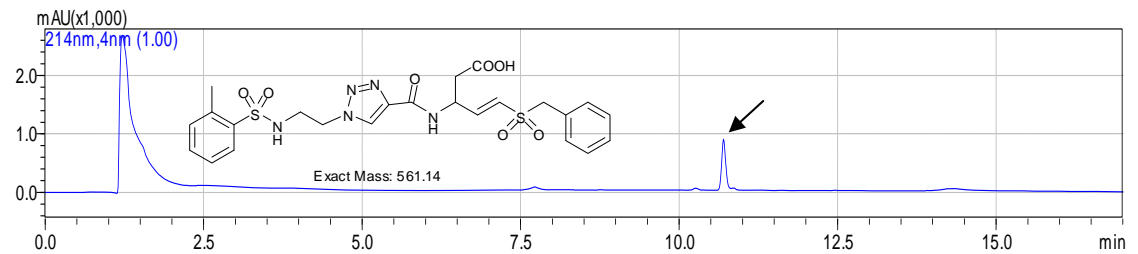

VSB-SB12:

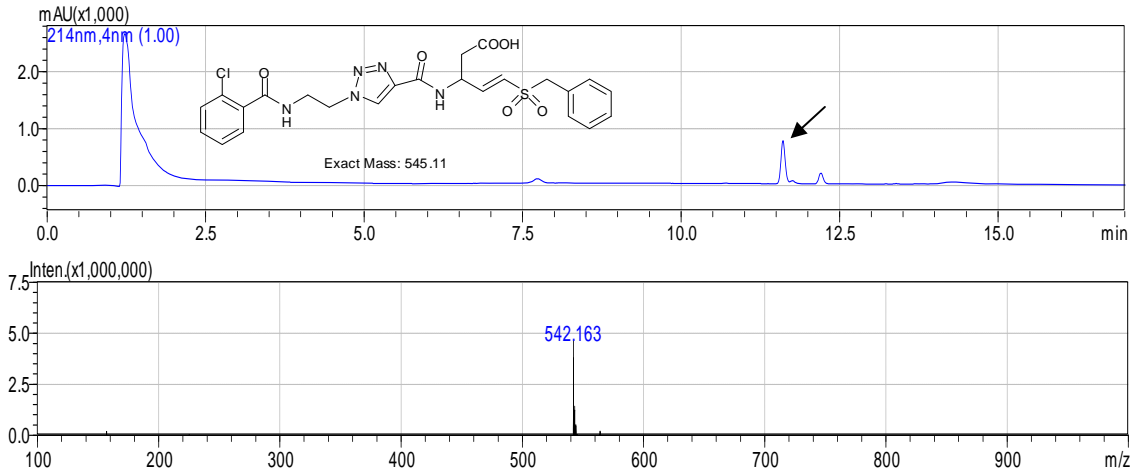

VSB-SC1:

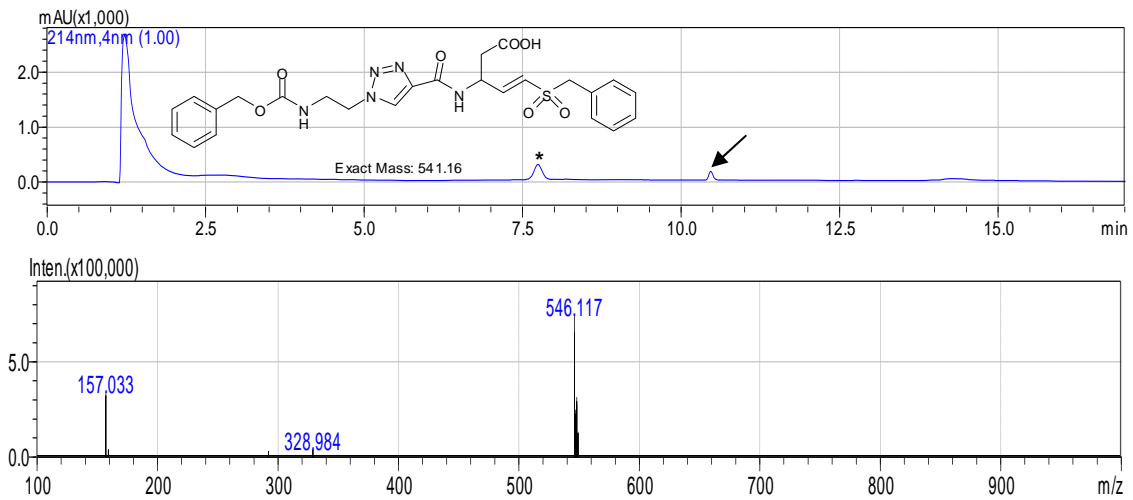

VSB-SC2:

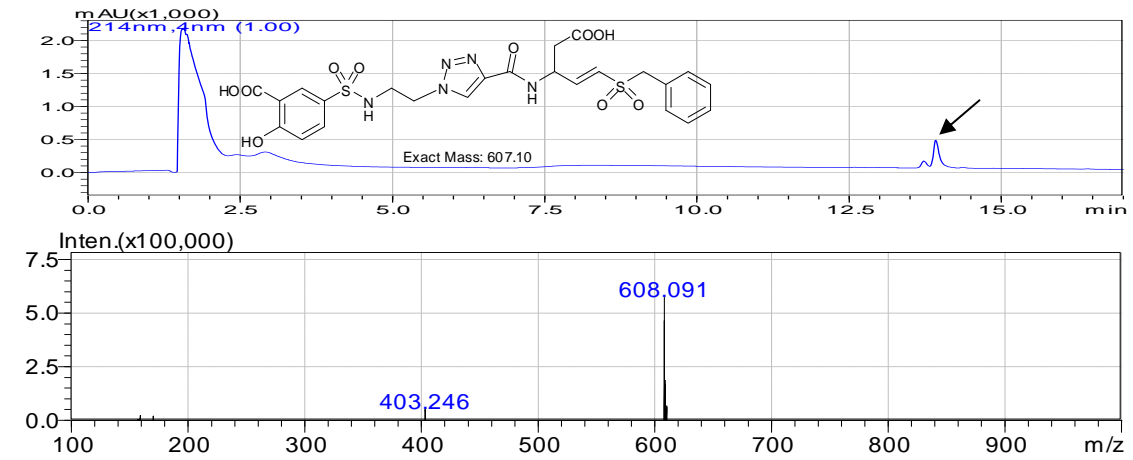

VSB-SC3:

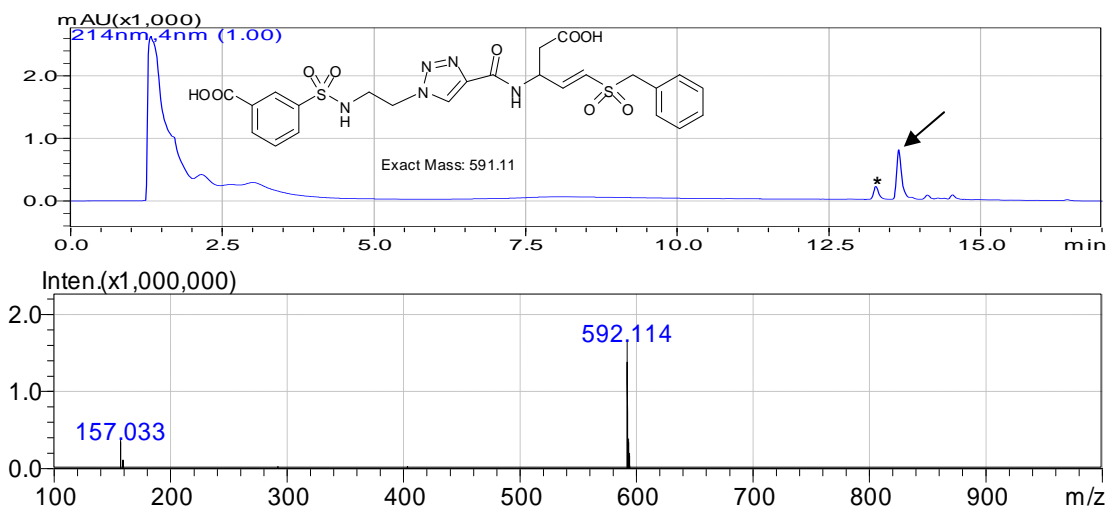

## 2.2 LC-MS profiles of pentyl vinyl sulfone inhibitors (18)

All conditions are based on:

0 – 10 min: 20% B (1% TFA in ACN) → 80% B

10 – 15 min: 80% B (1% TFA in ACN) → 100% B

15 – 17 min: 100% B

\* Starting material

VSP-warhead:

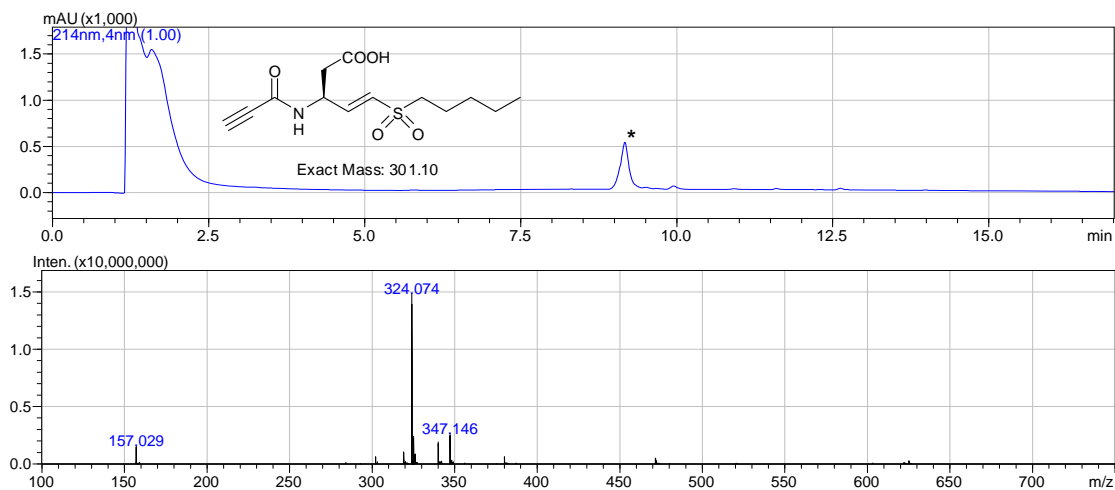

VSP-A1:

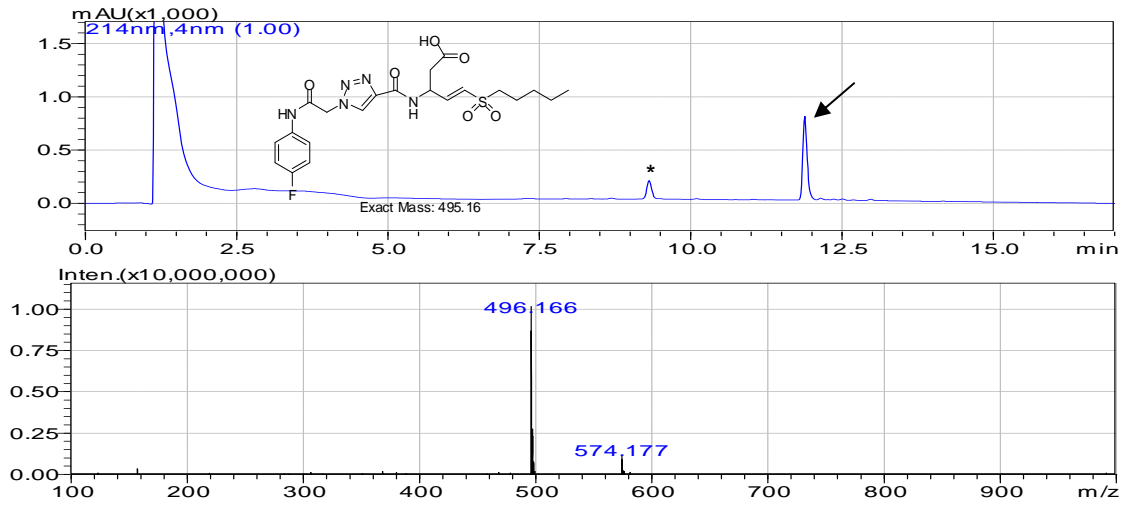

VSP-A2:

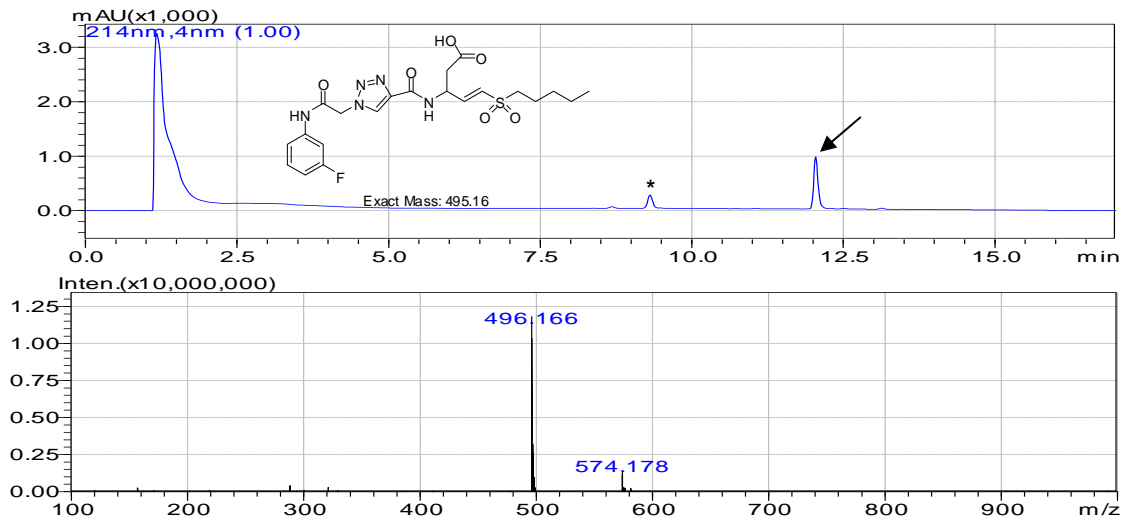

VSP-A3:

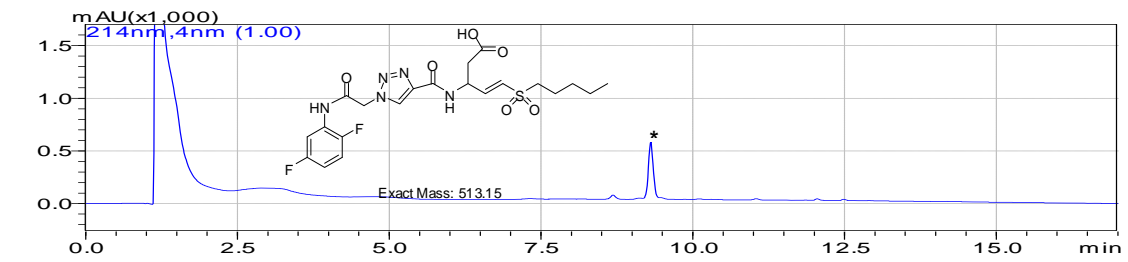

VSP-A4:

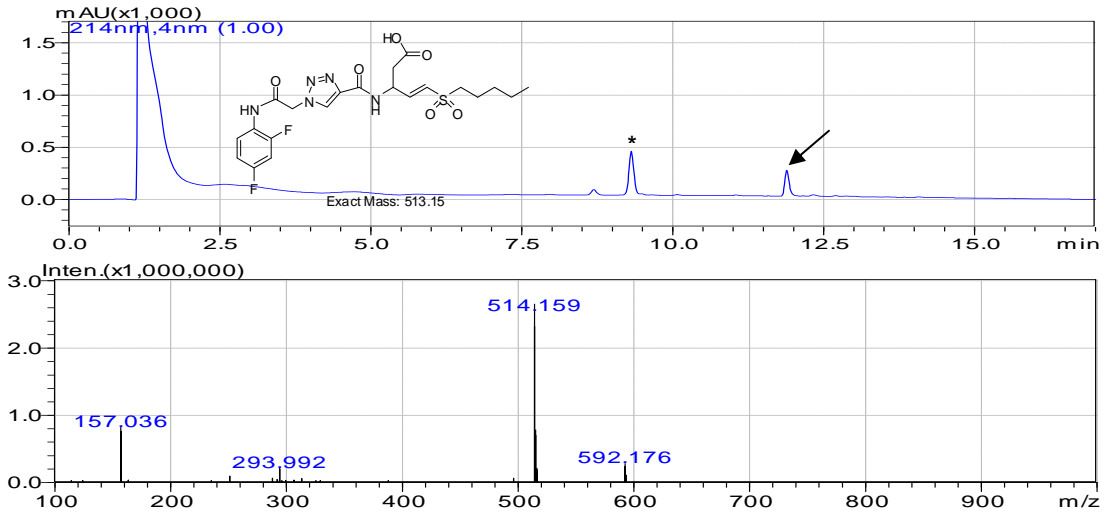

VSP-A5:

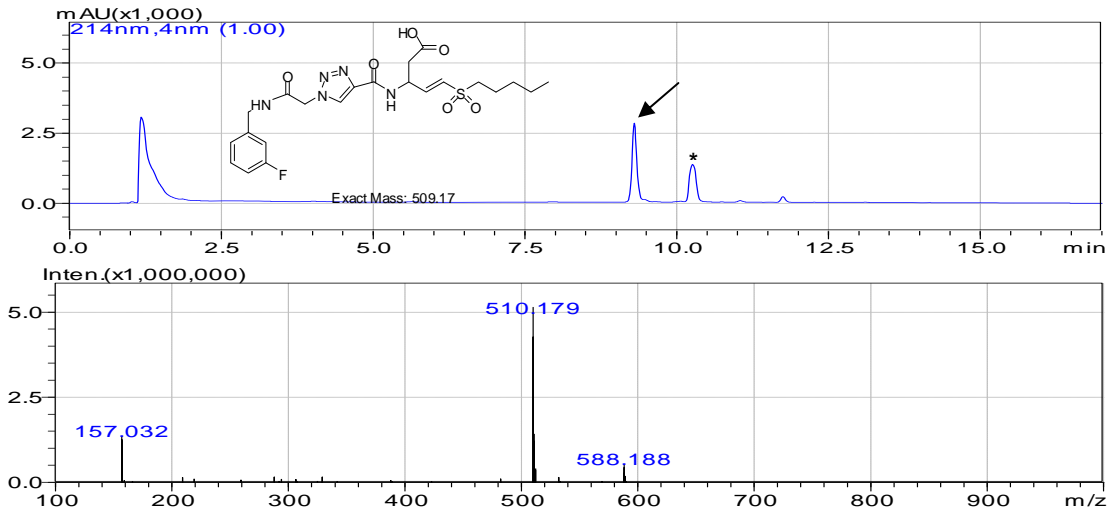

VSP-A6:

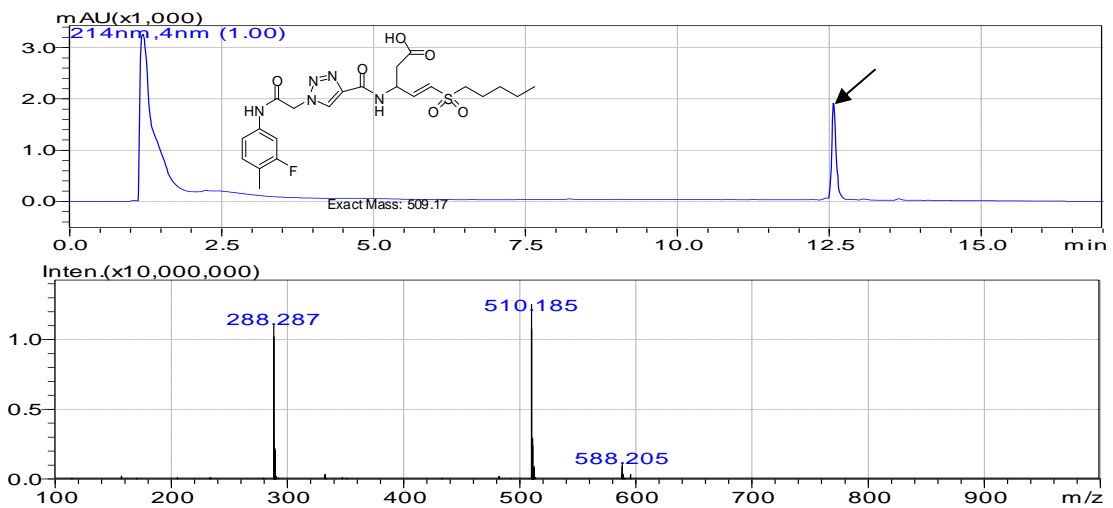

VSP-A7:

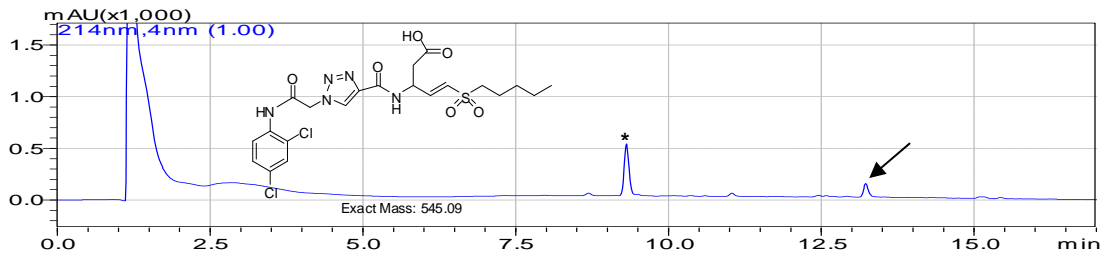

VSP-A8:

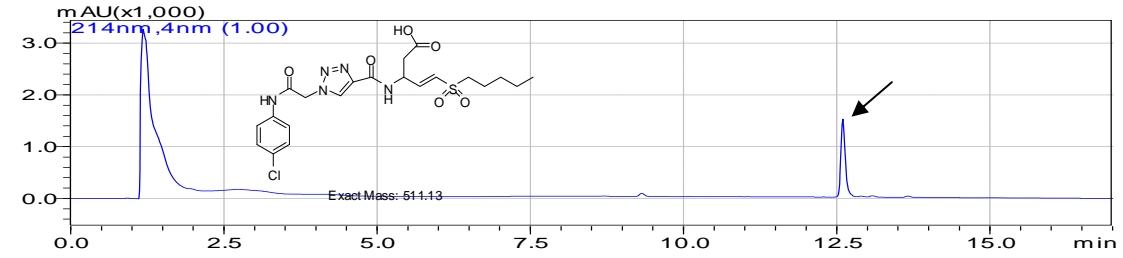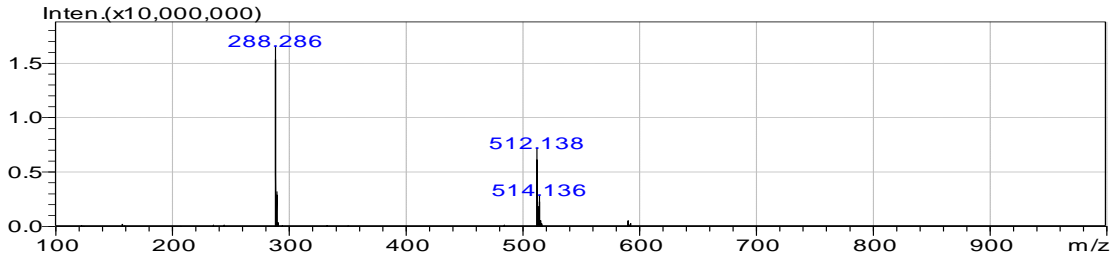

VSP-A9:

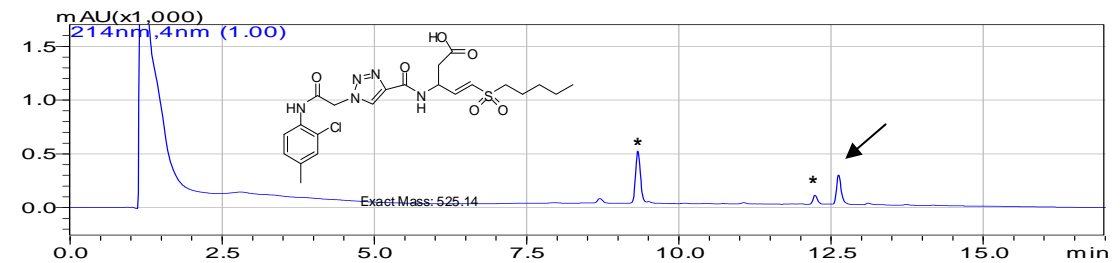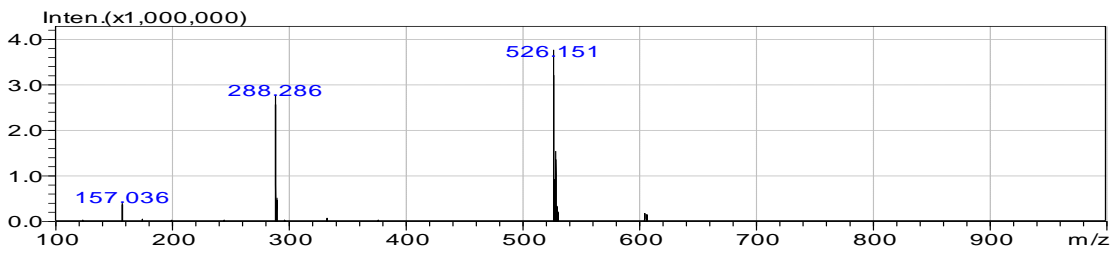

VSP-A10:

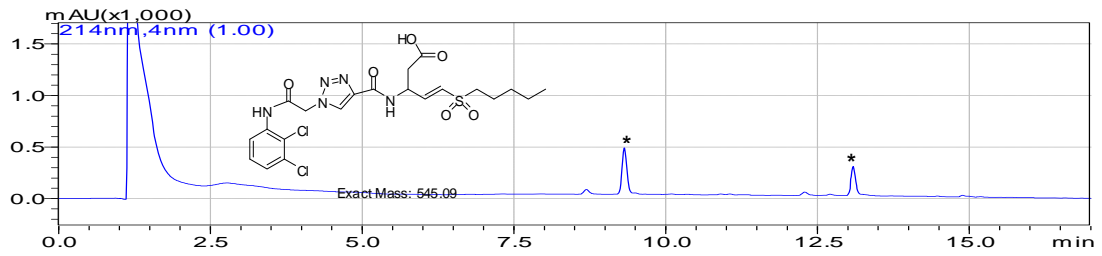

VSP-A11:

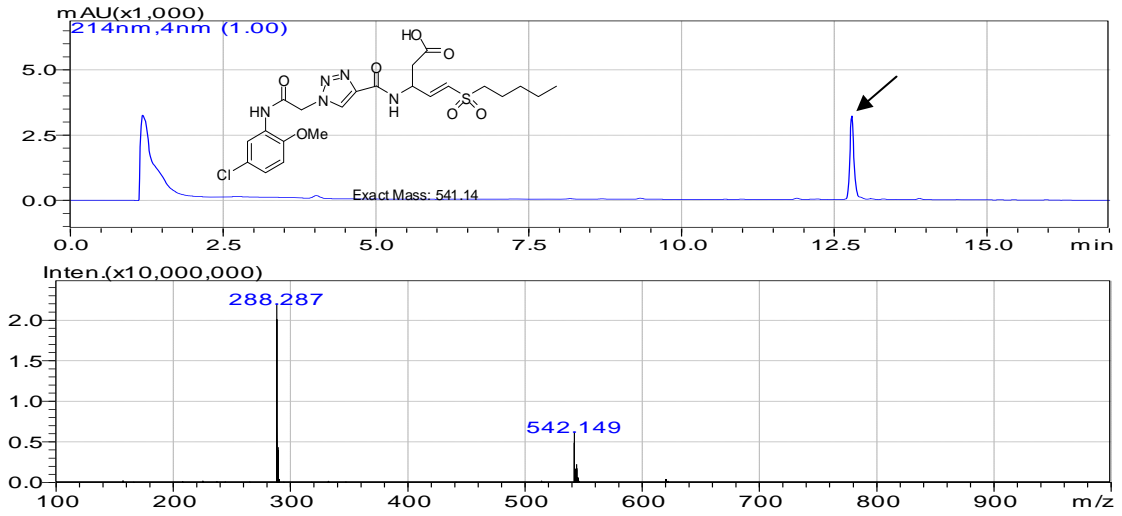

VSP-A12:

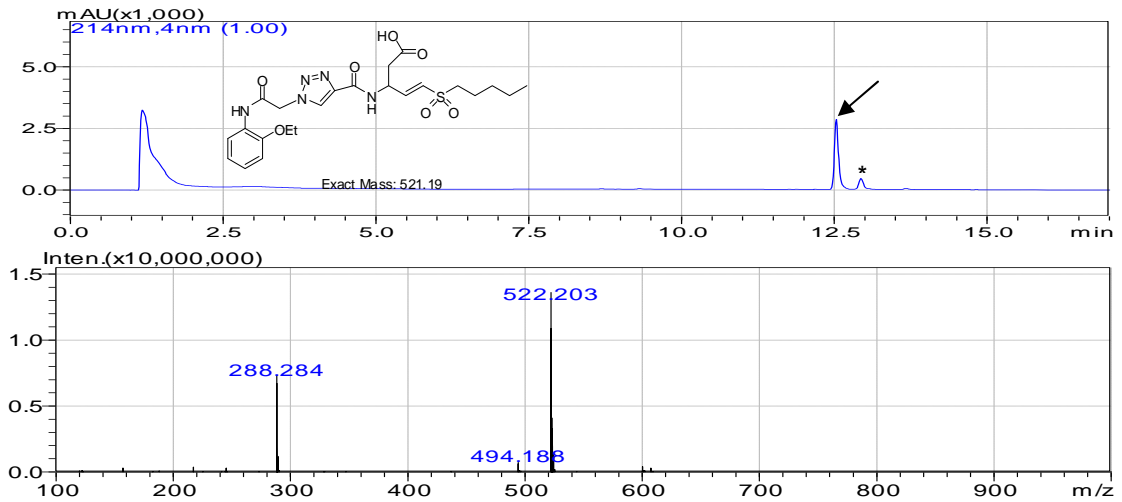



VSP-B1:

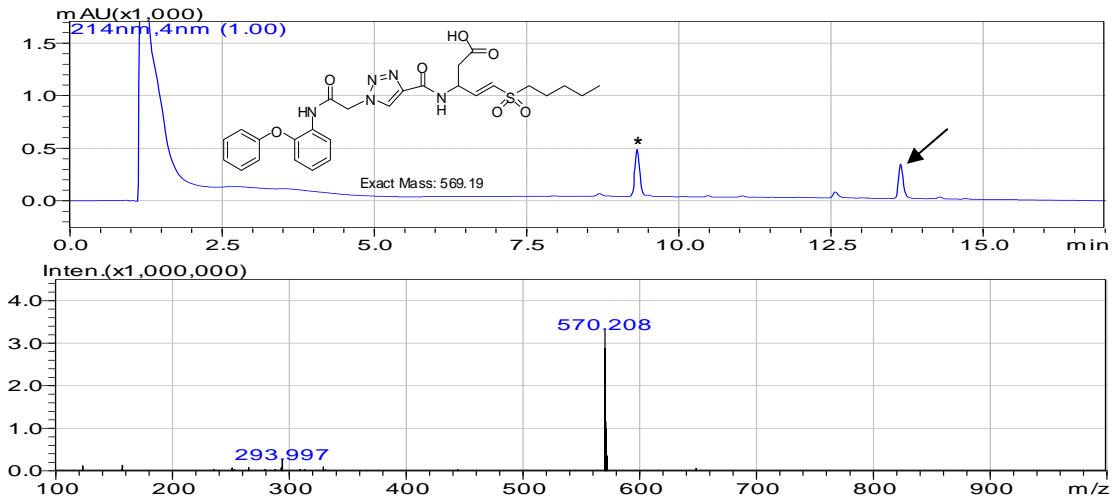

VSP-B2:

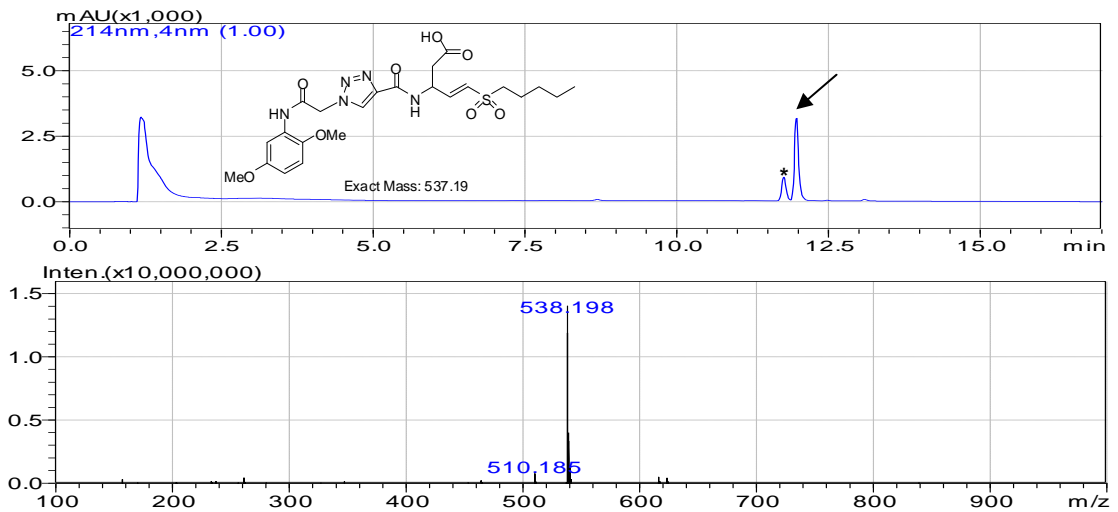

VSP-B3:

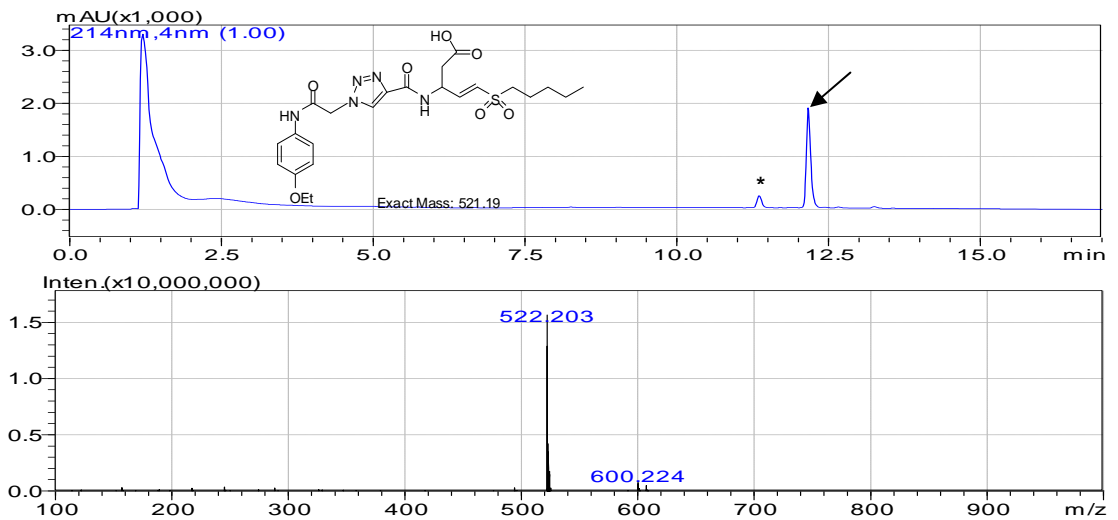

VSP-B4:

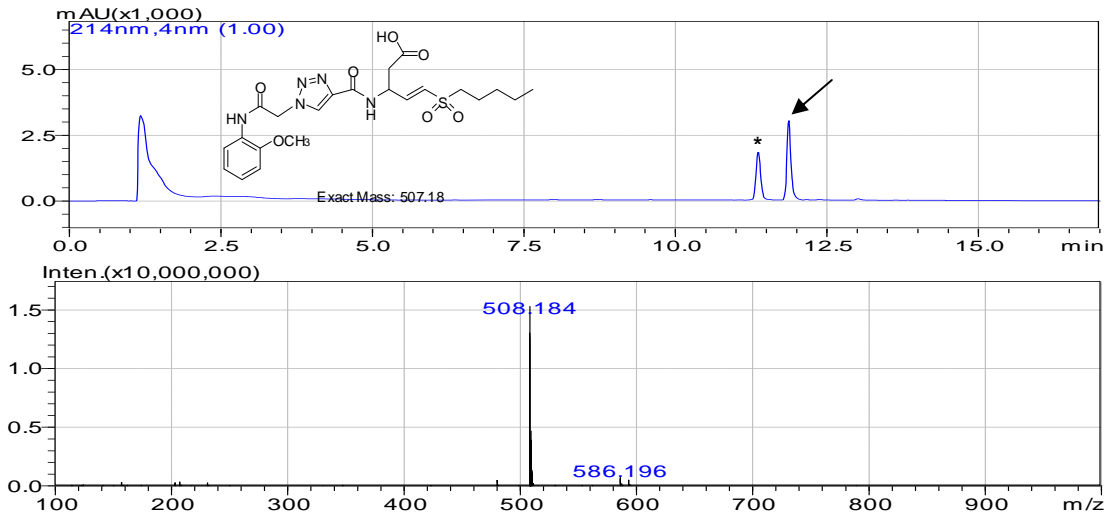

VSP-B5:

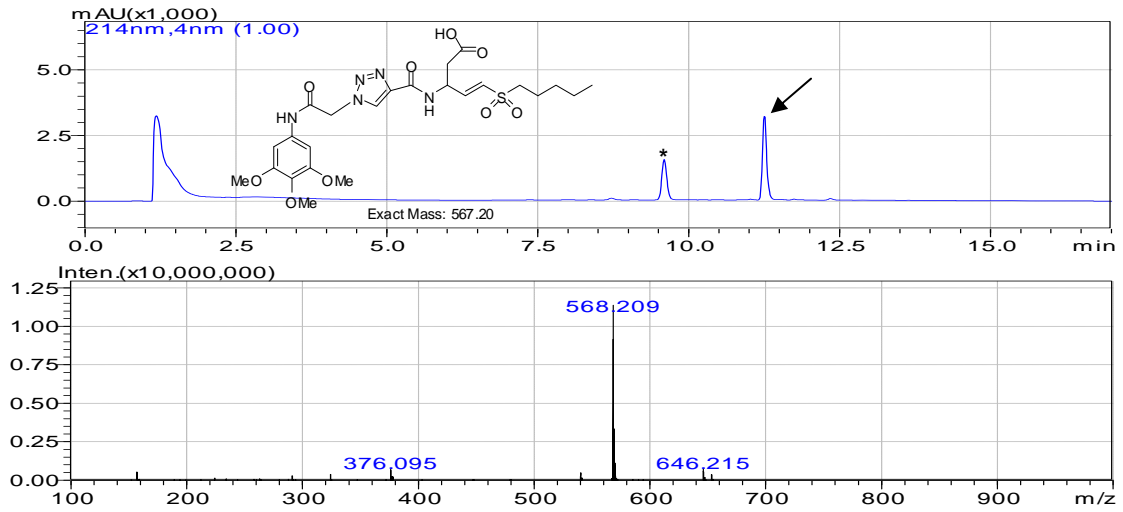

VSP-B6:

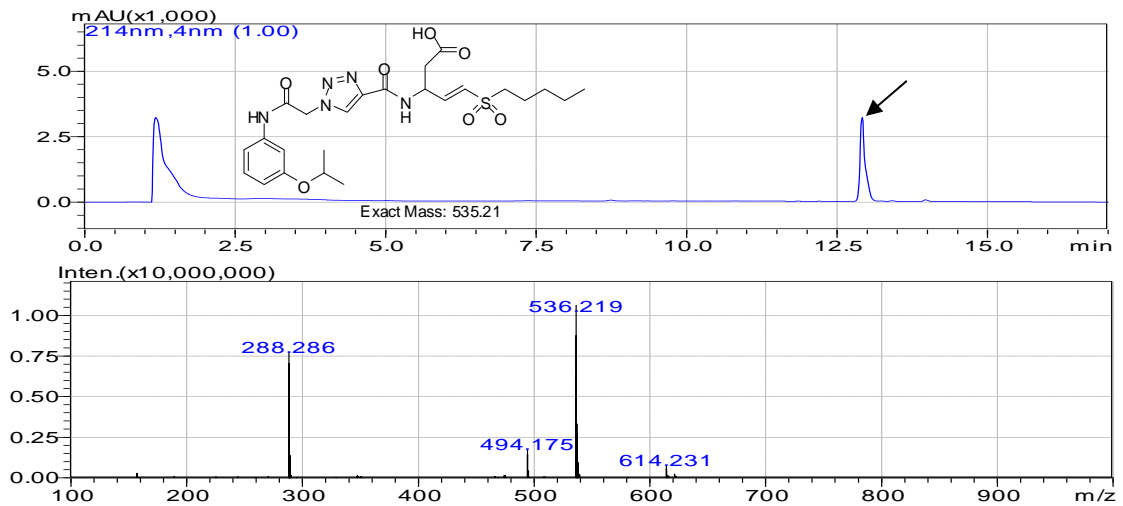

VSP-B7:

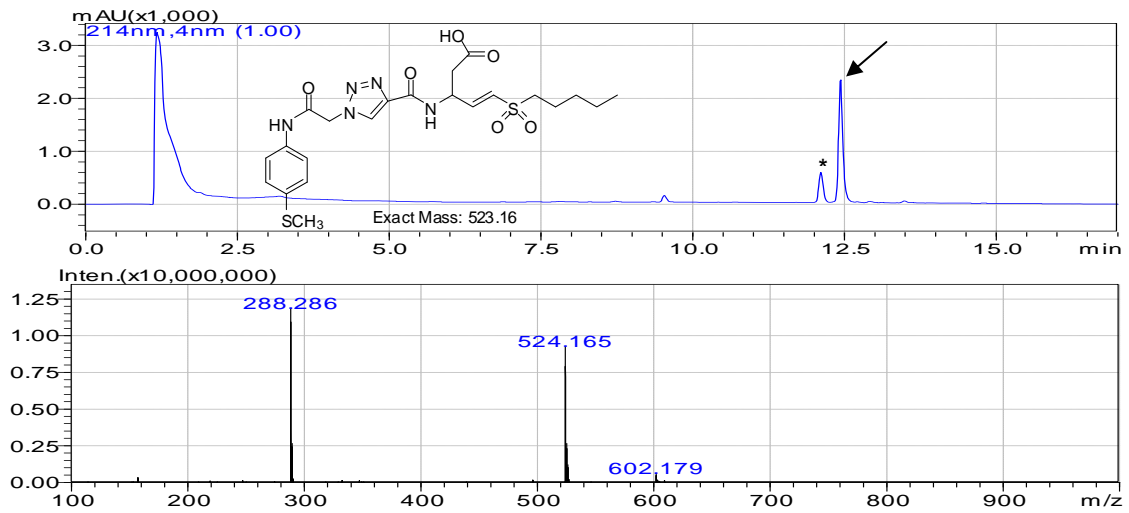

VSP-B8:

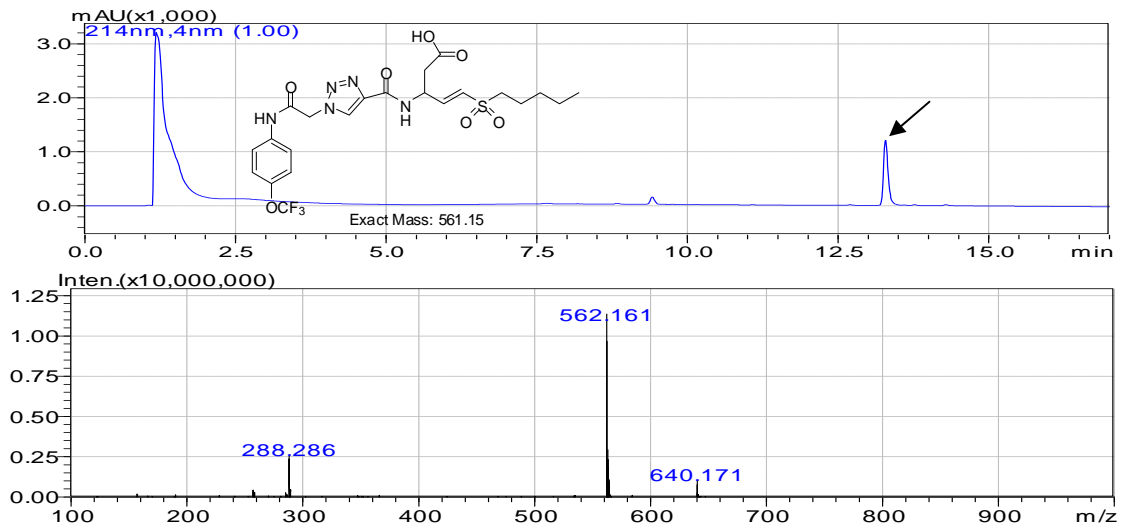

VSP-B9:

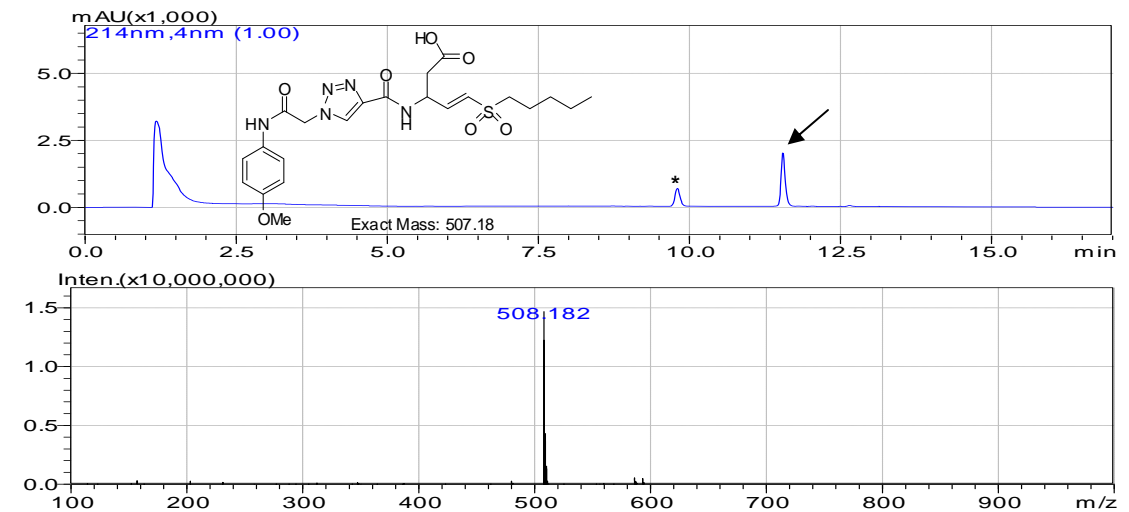

VSP-B10:

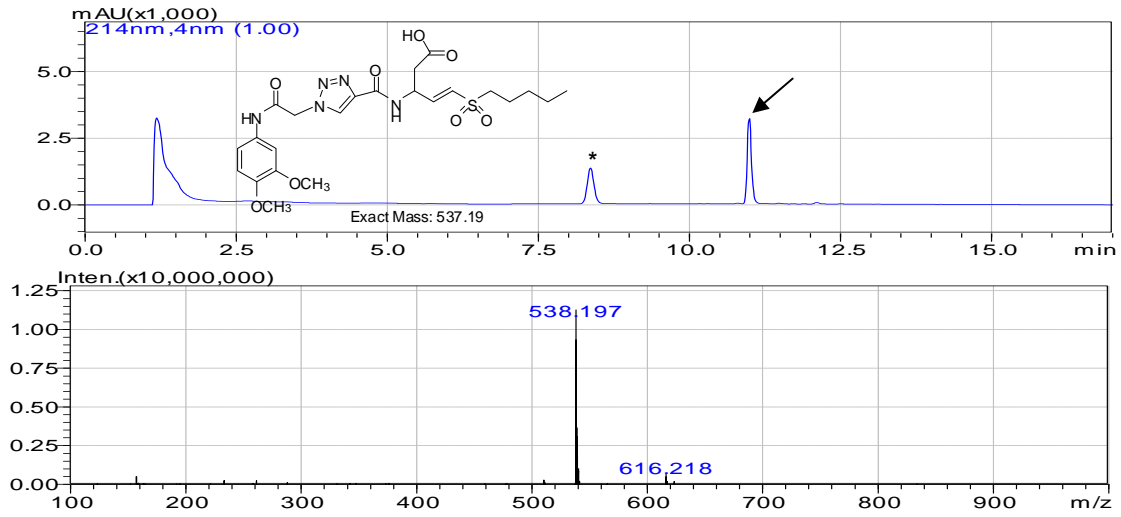

VSP-B11:

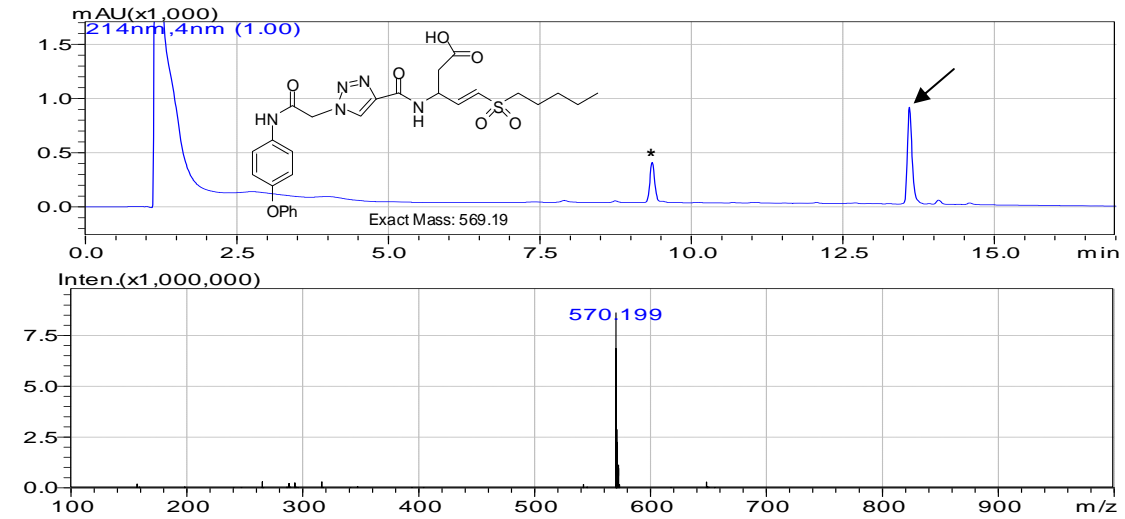

VSP-B12:

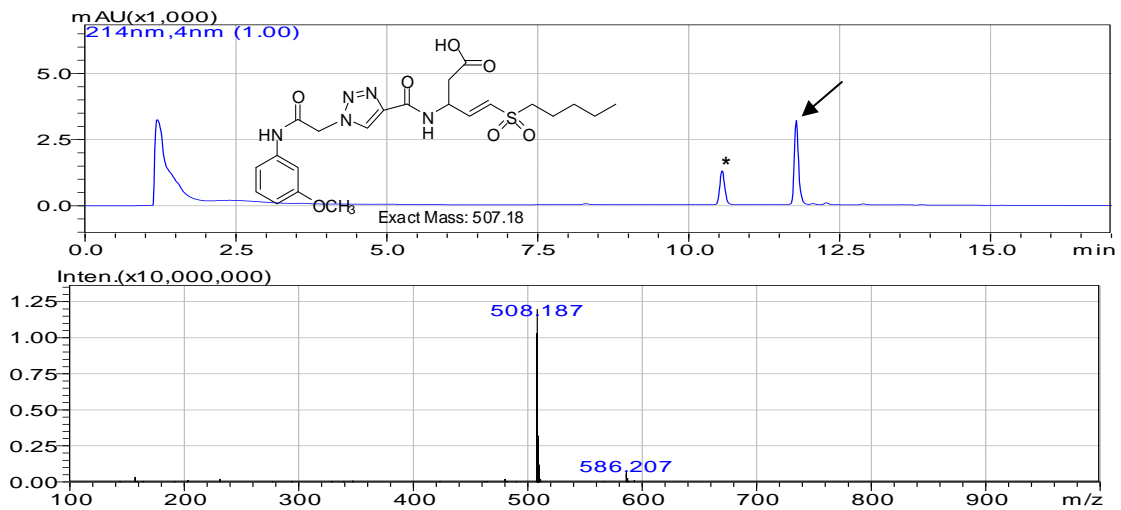

VSP-C1:

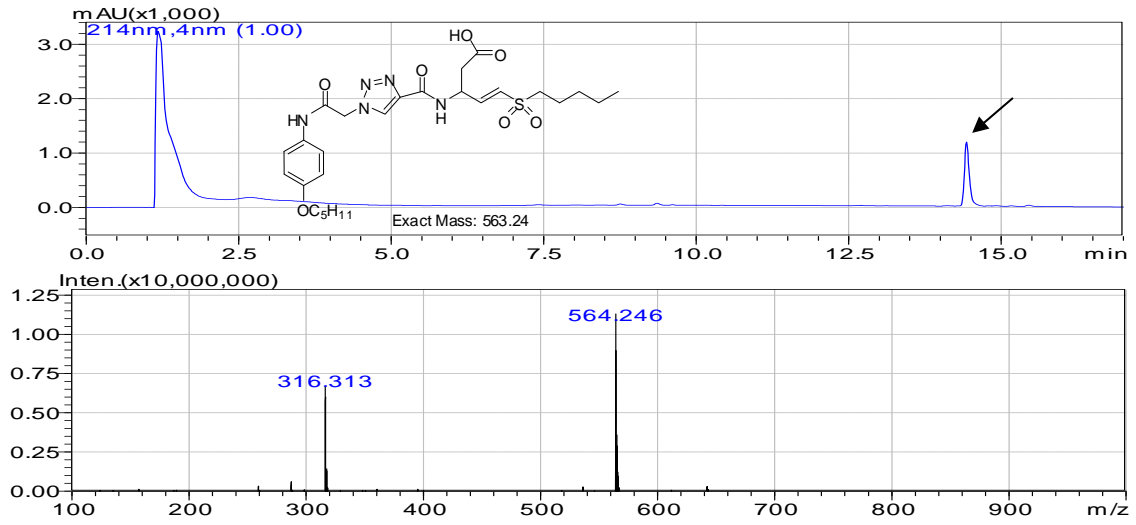

VSP-C2:

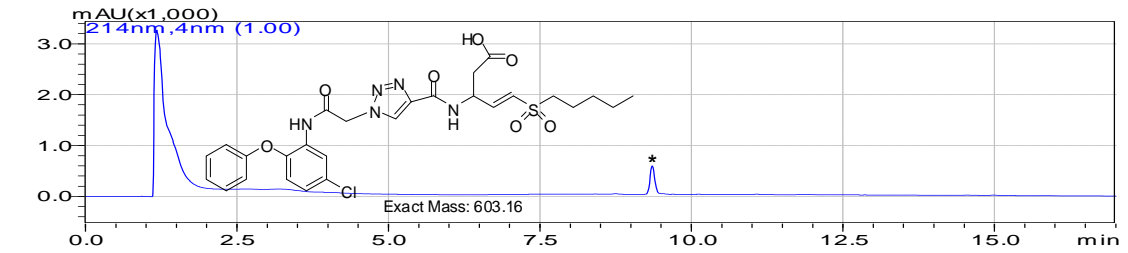

VSP-C3:

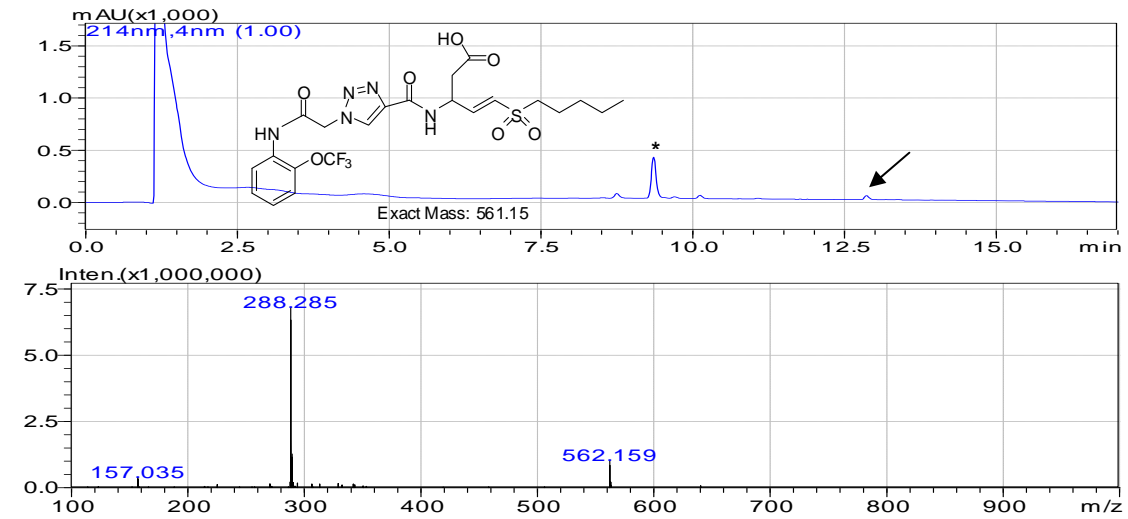

VSP-C4:

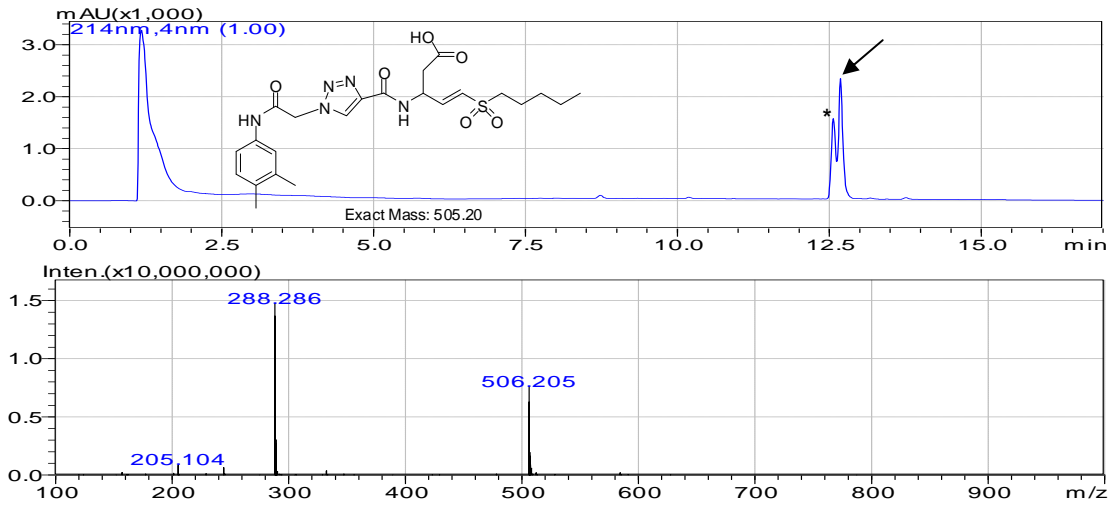

VSP-C5:

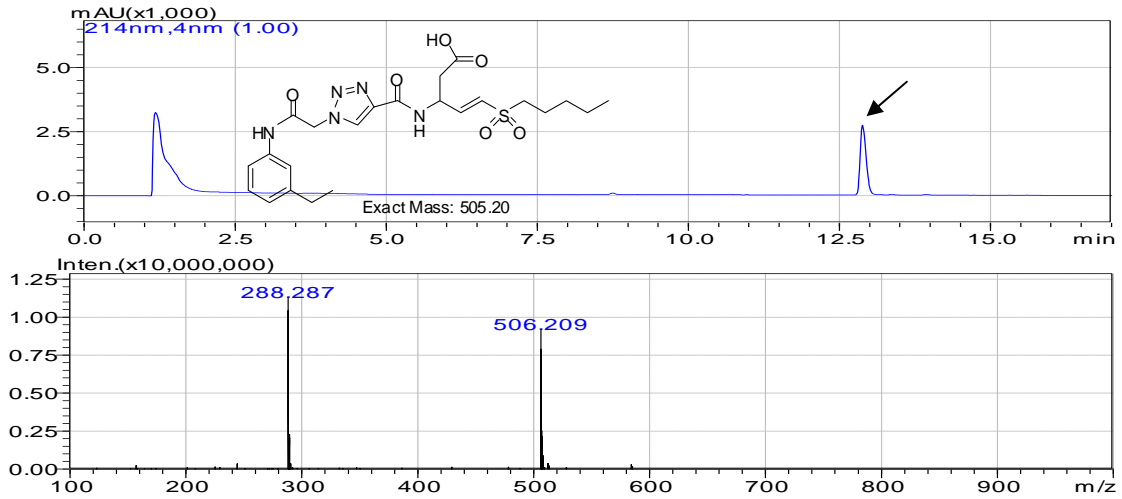

VSP-C6:

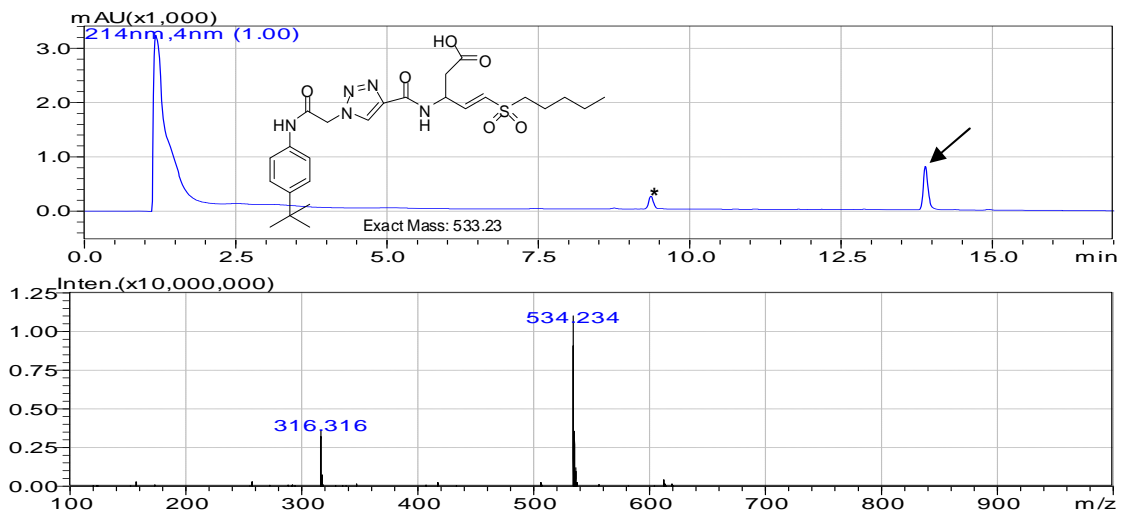

VSP-C7:

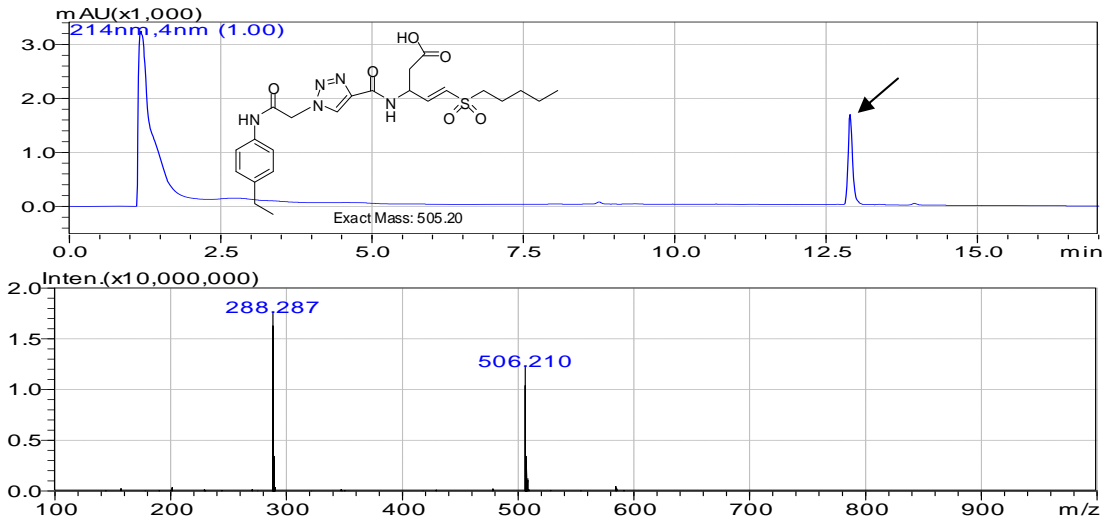

VSP-C8:

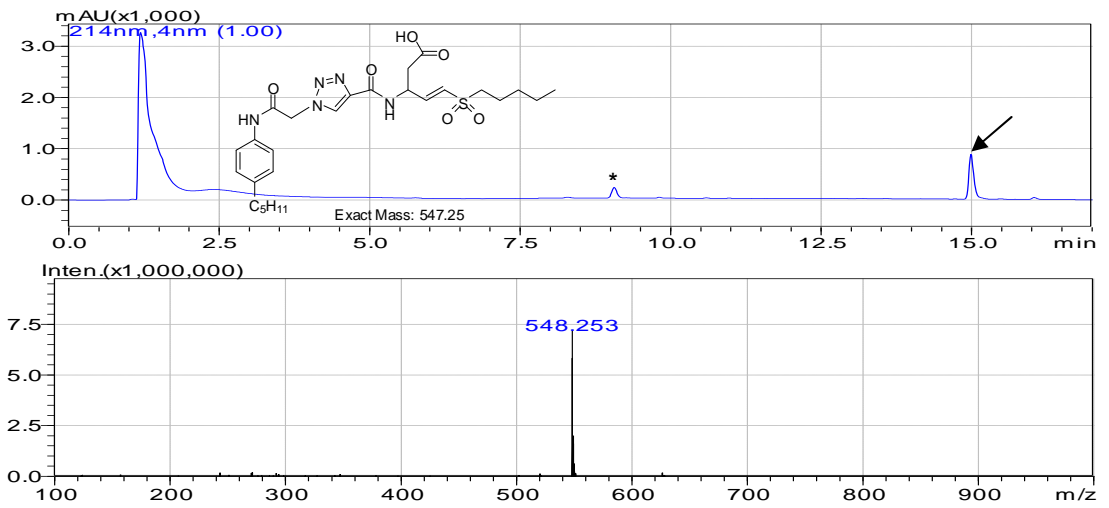

VSP-C9:

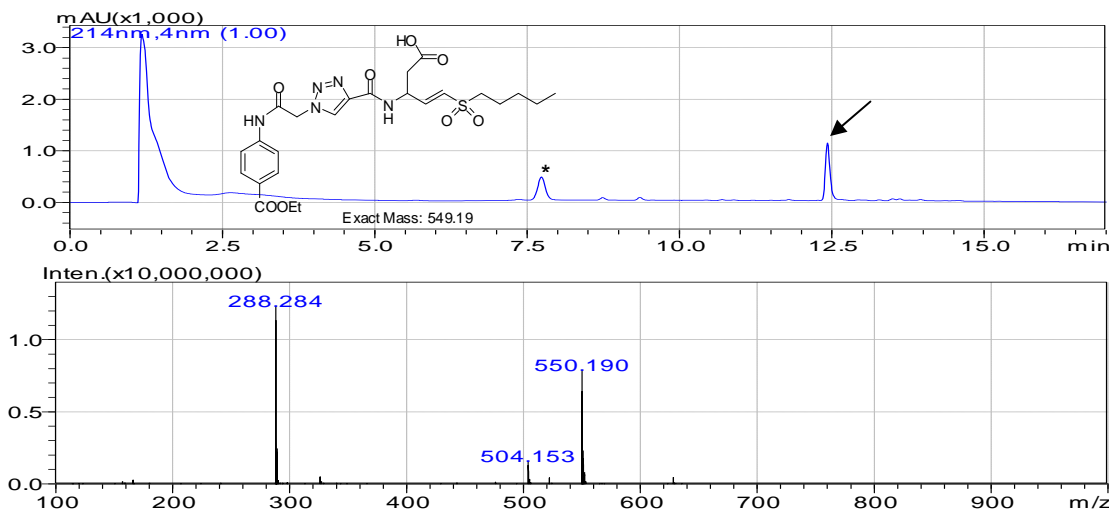

VSP-C10:

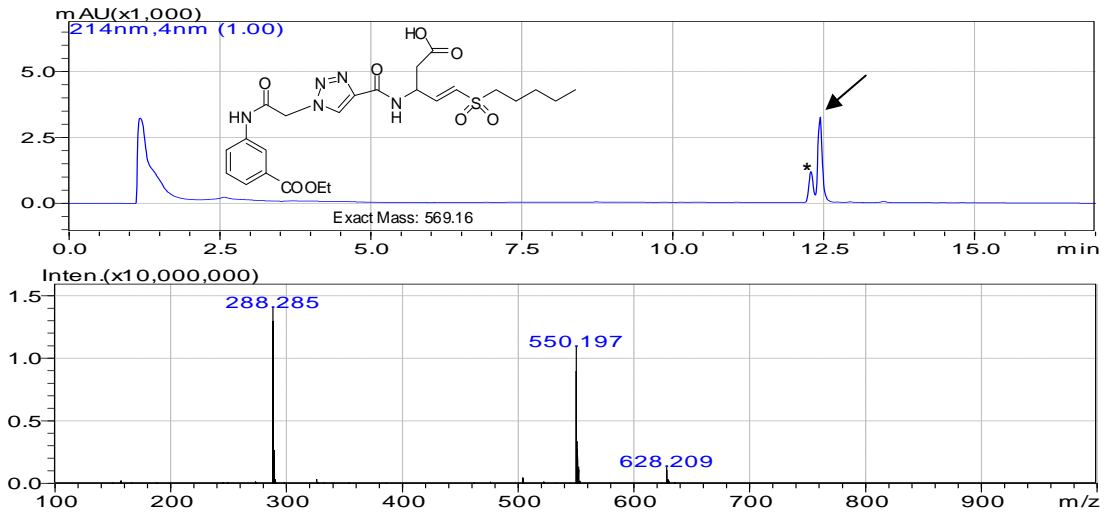

VSP-C11:

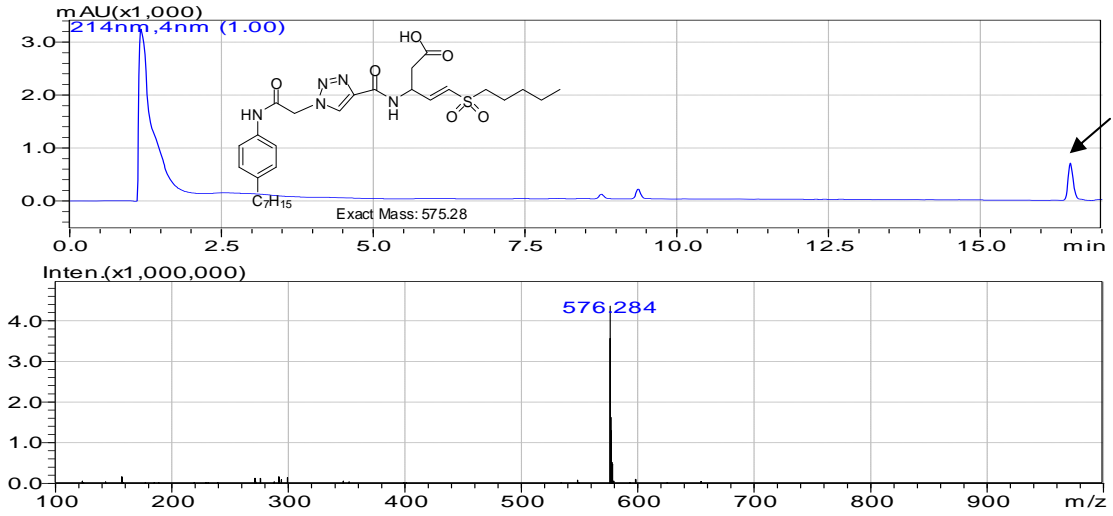

VSP-C12:

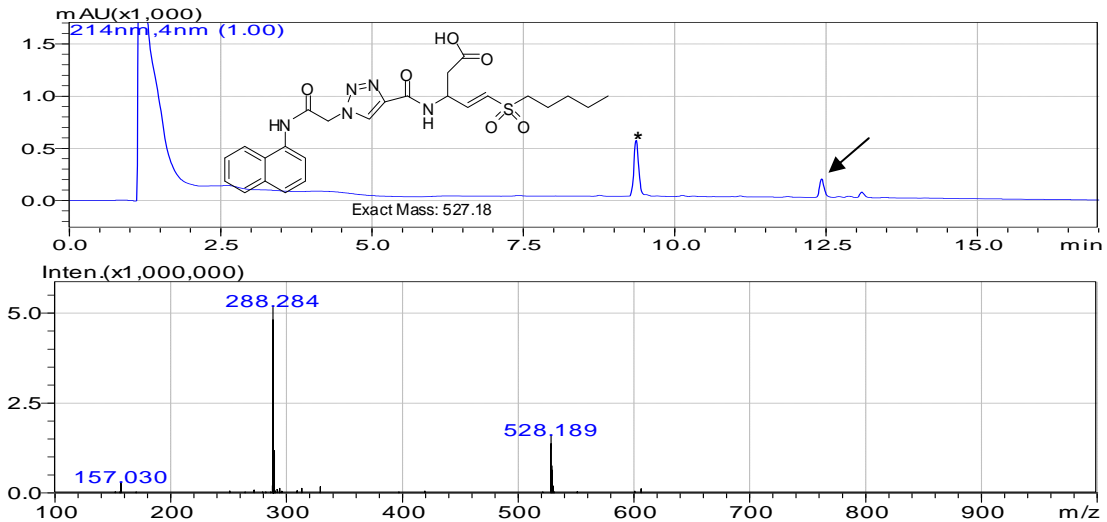



VSP-D1:

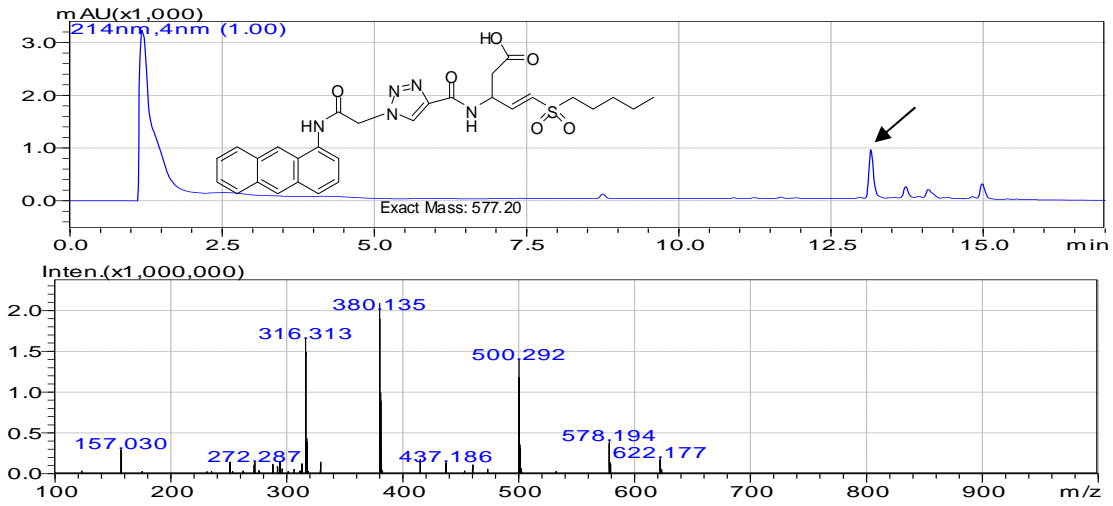

VSP-D2:

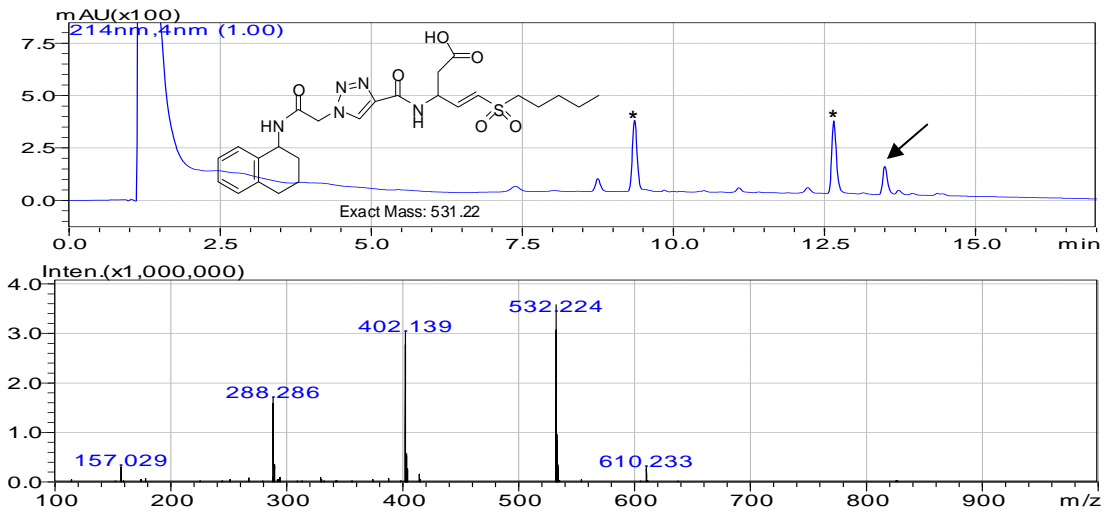

VSP-D3:

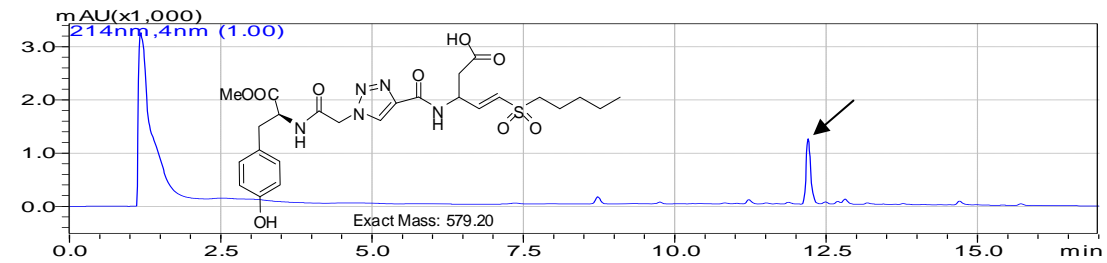

VSP-D4:

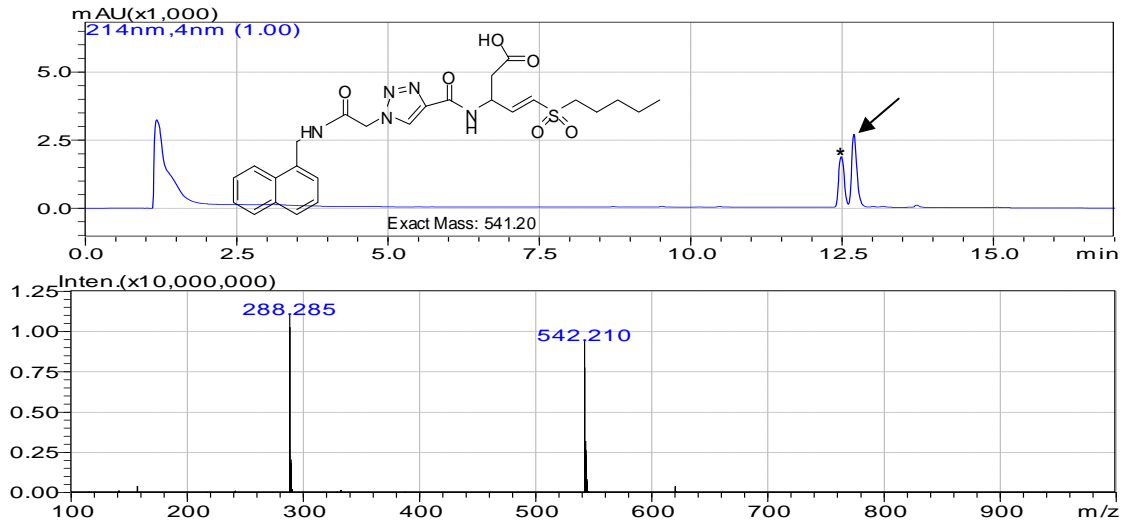

VSP-SA1:

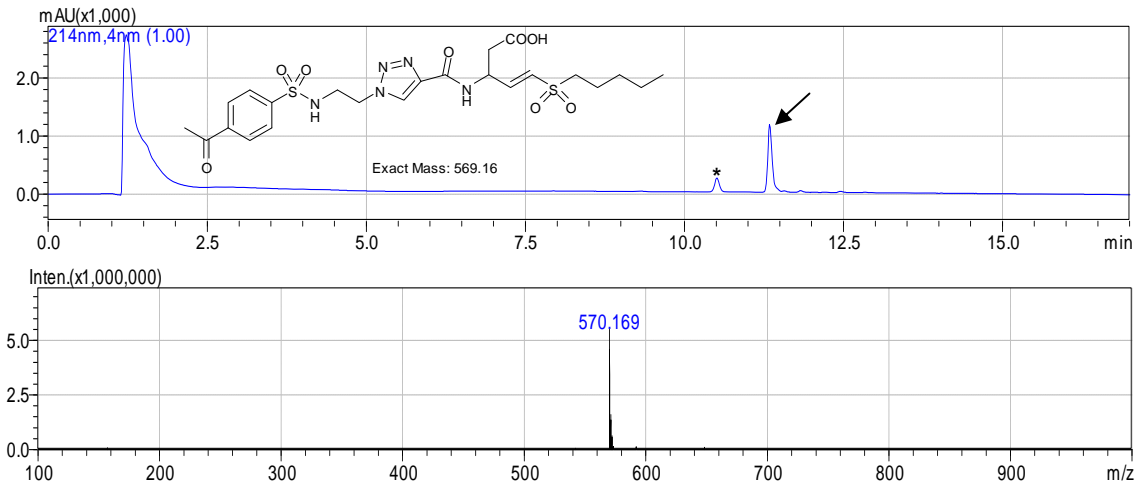

VSP-SA2:

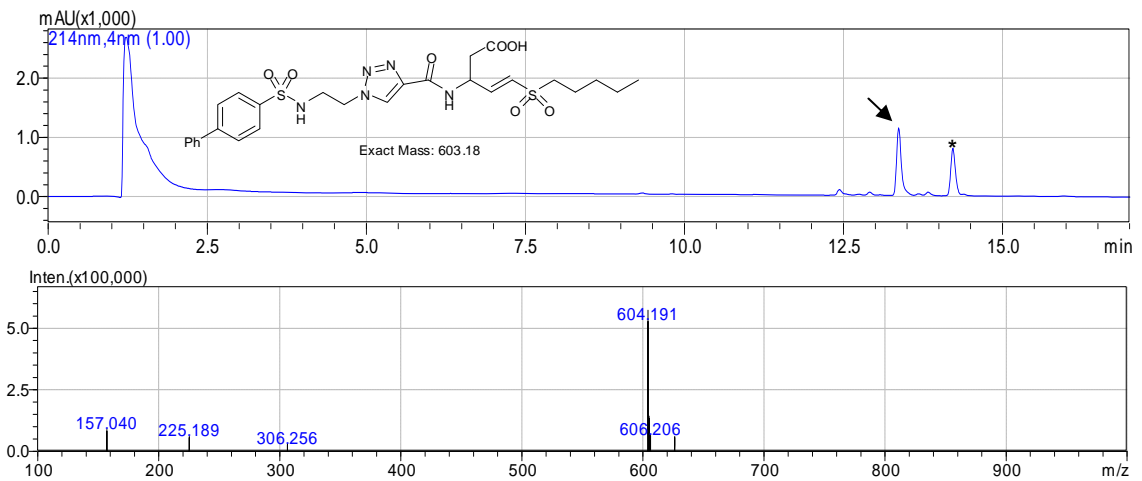

VSP-SA3:

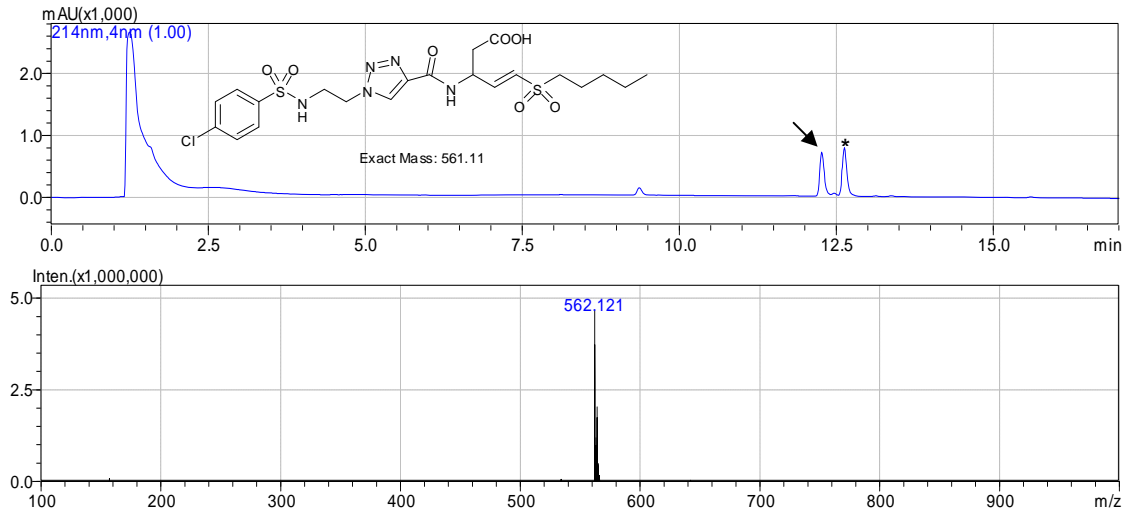

VSP-SA4:

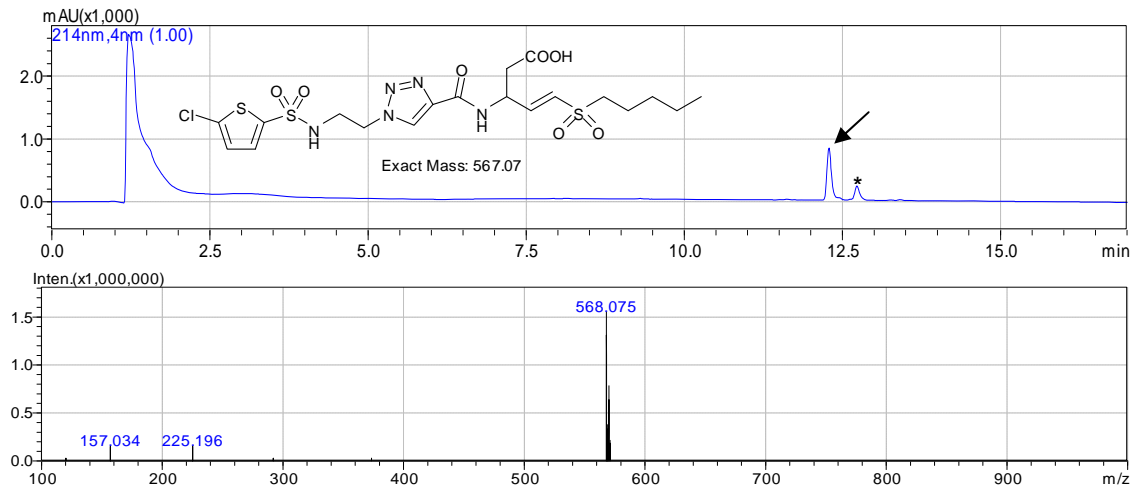

VSP-SA5:

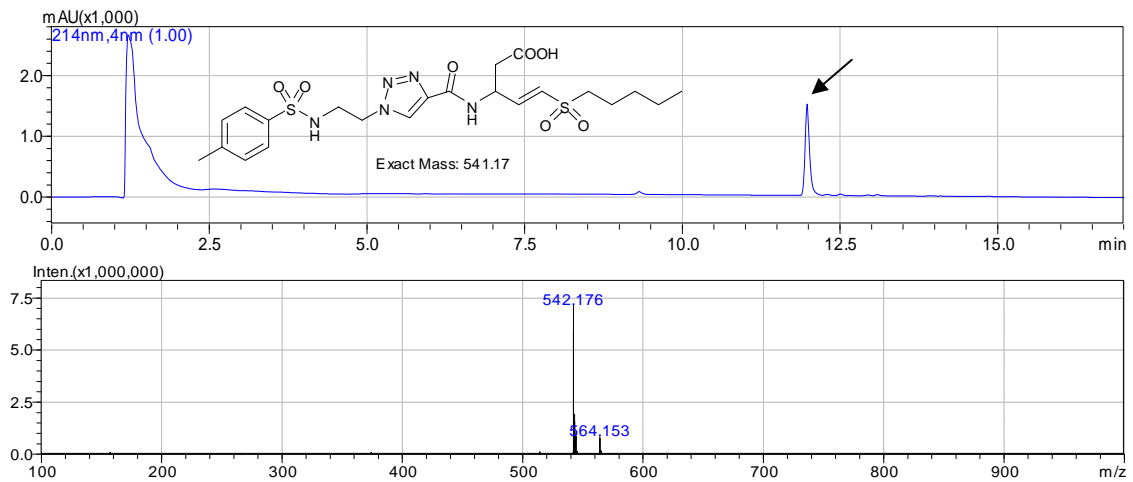

VSP-SA6:

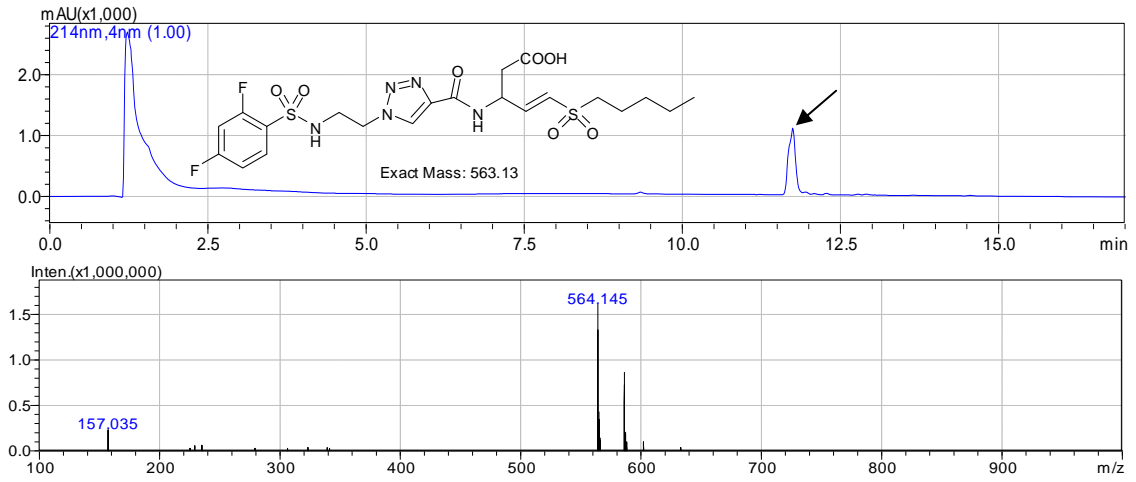

VSP-SA7:

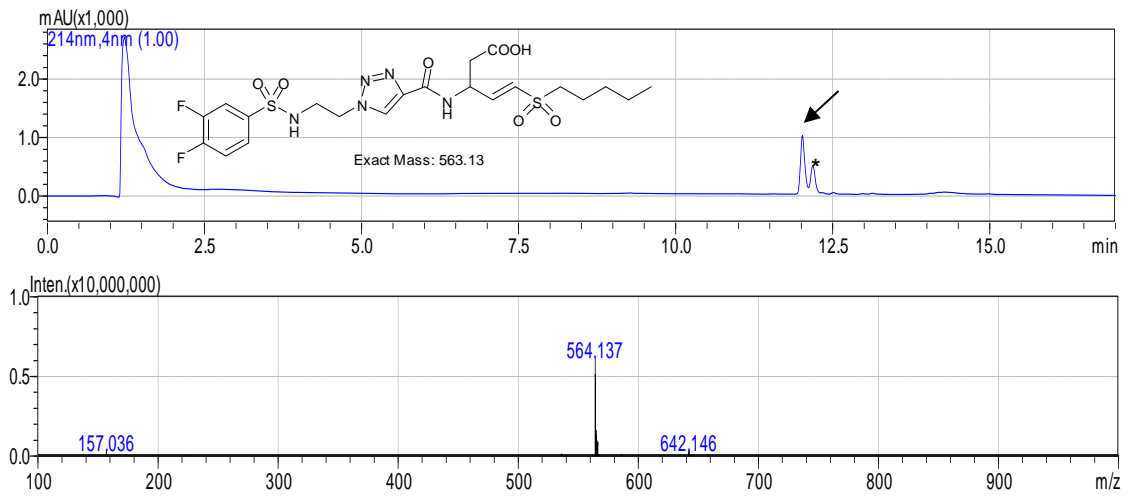

VSP-SA8:

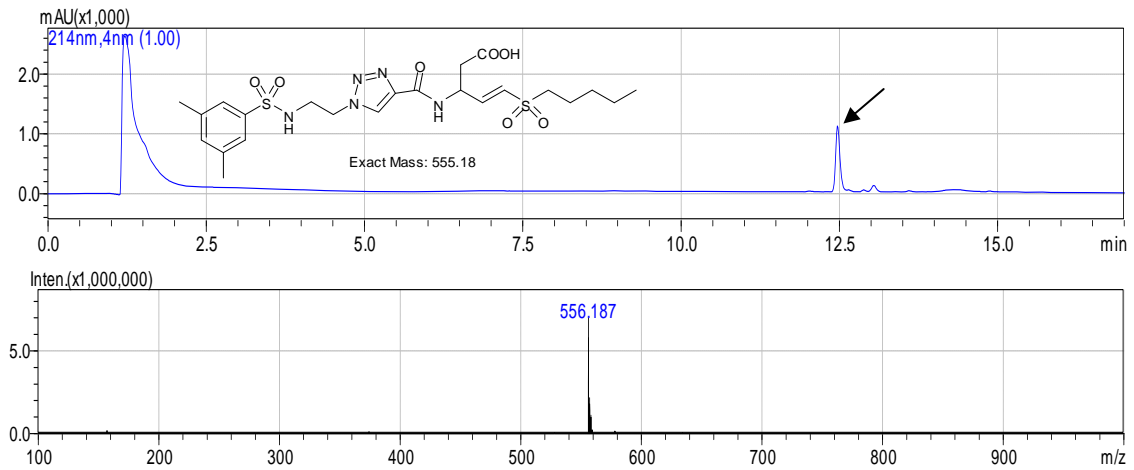

VSP-SA9:

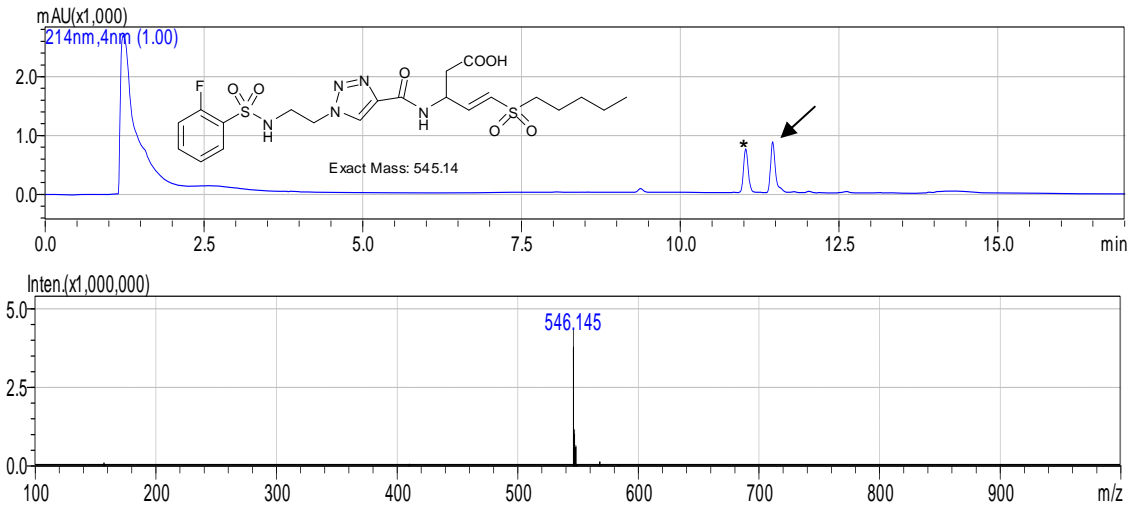

VSP-SA10:

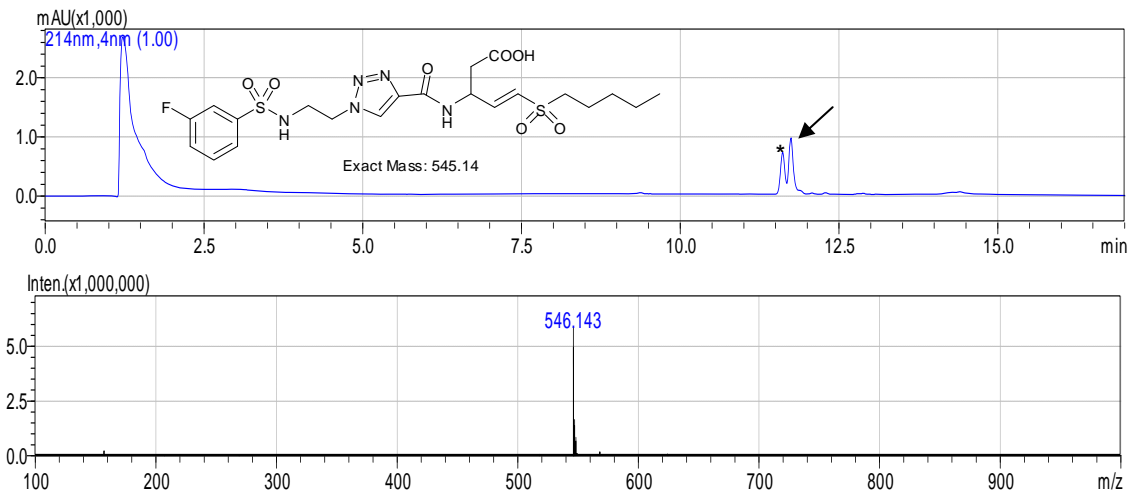

VSP-SA11:

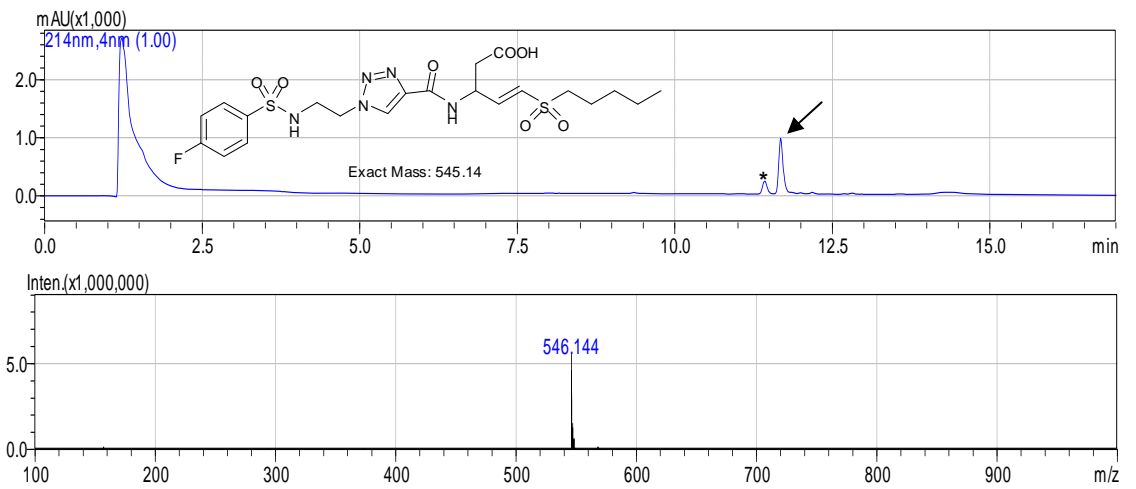

VSP-SA12:

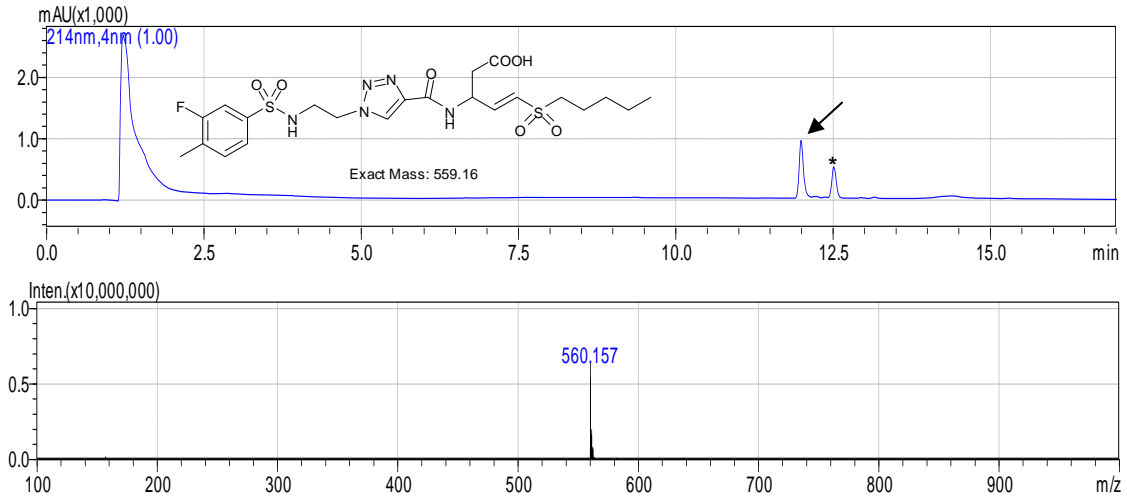

VSP-SB1:

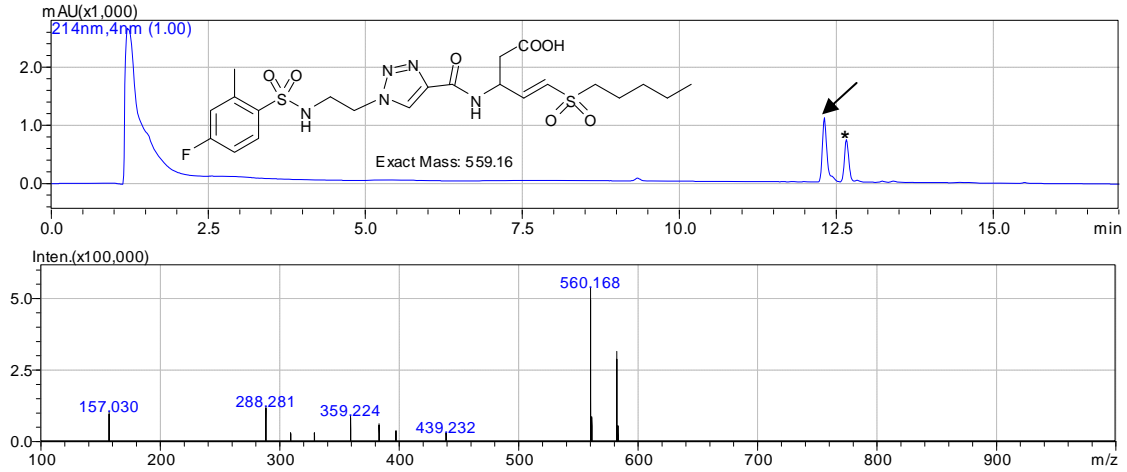

VSP-SB2:

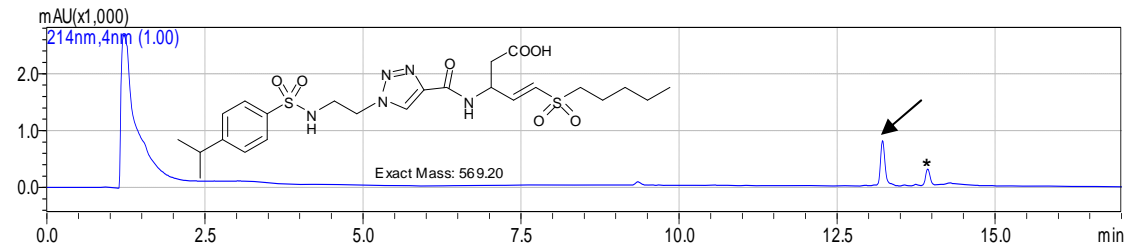

VSP-SB3:

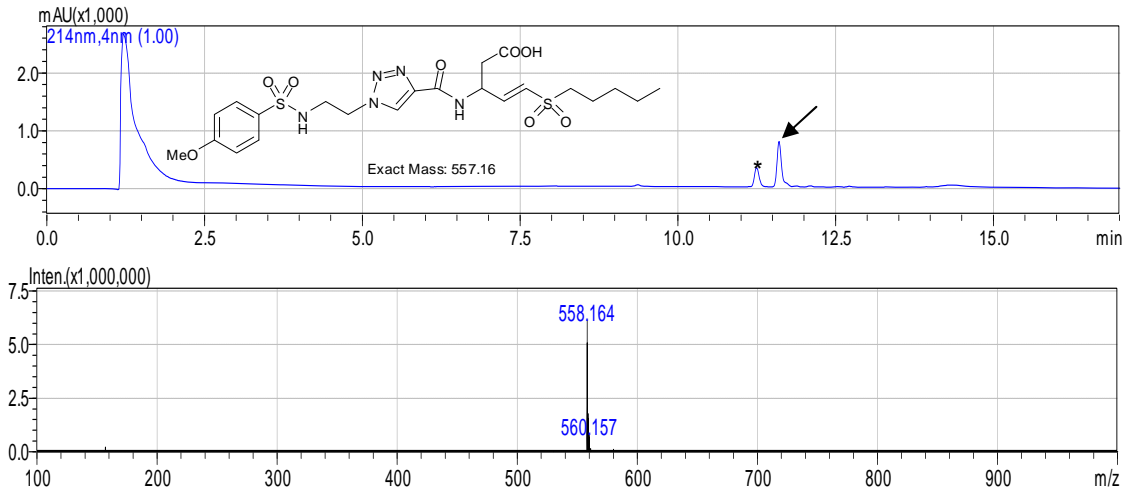

VSP-SB6:

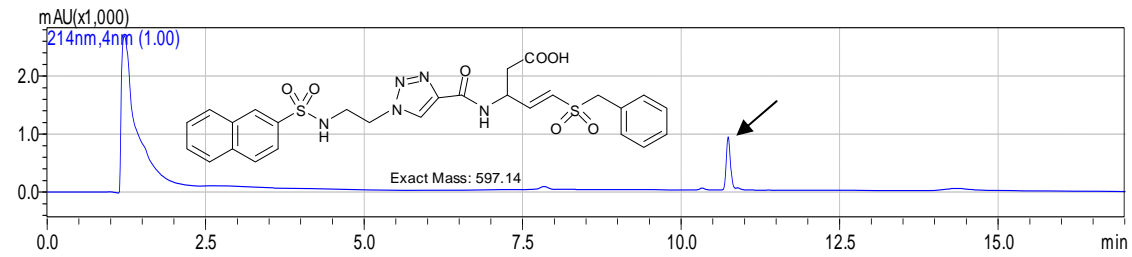

VSP-SB7:

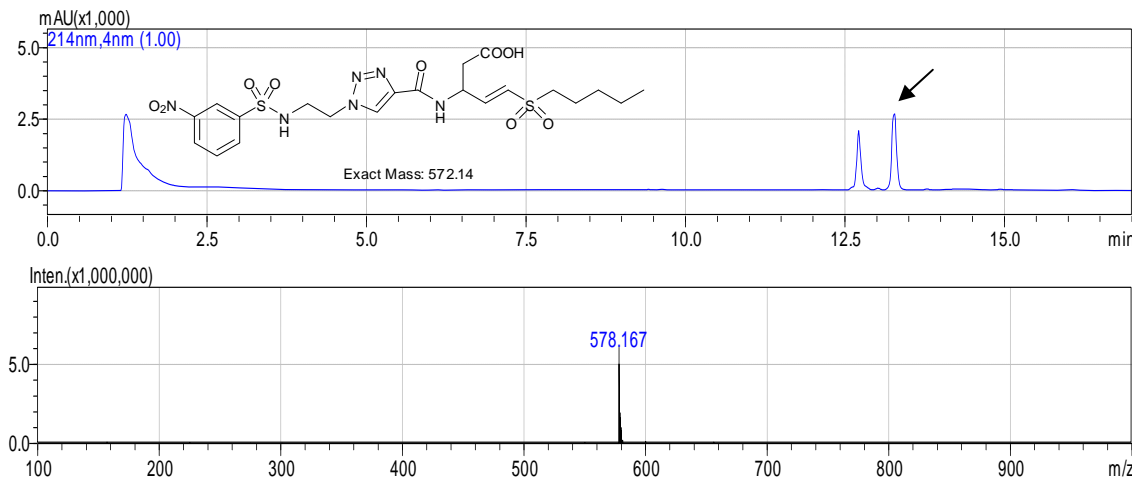

VSP-SB8:

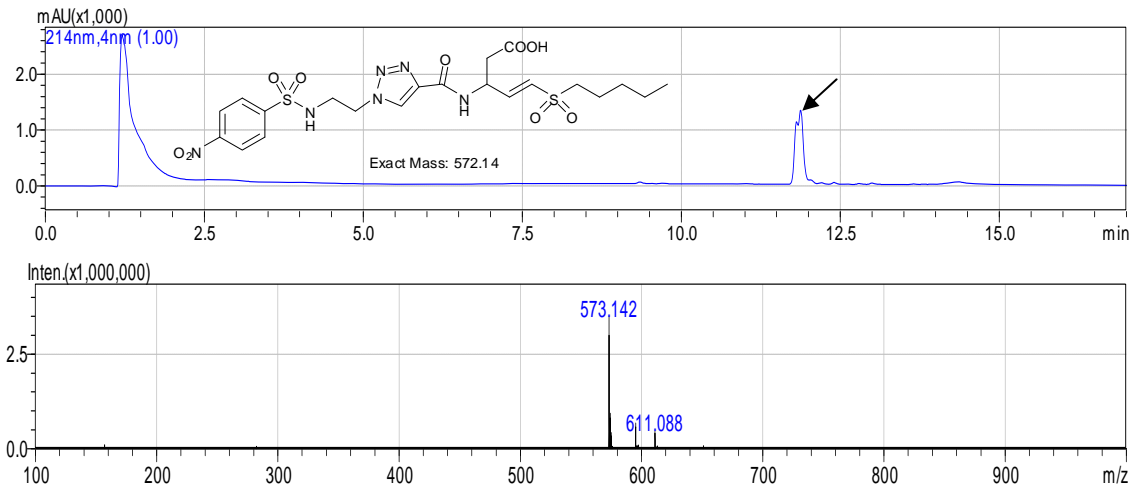

VSP-SB9:

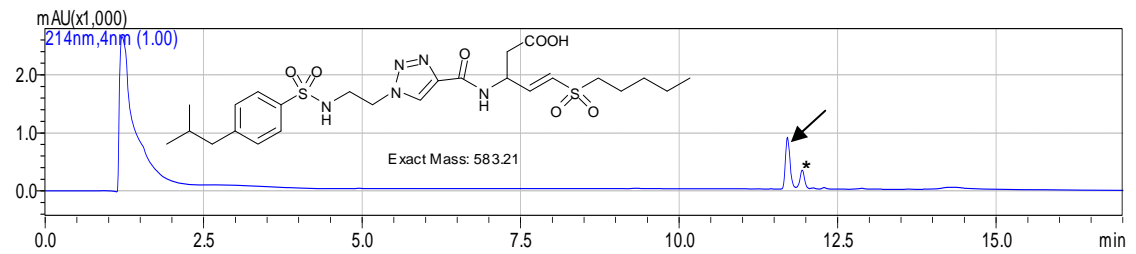

VSP-SB10:

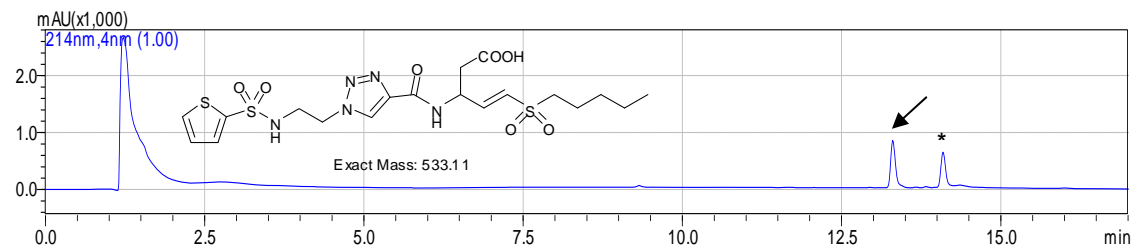

VSP-SB11:

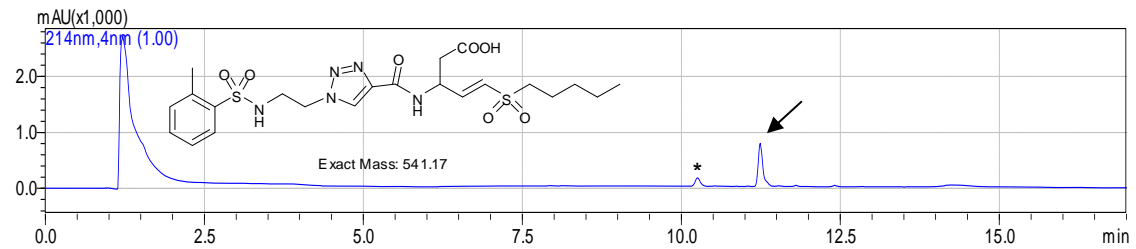



VSP-SB12:

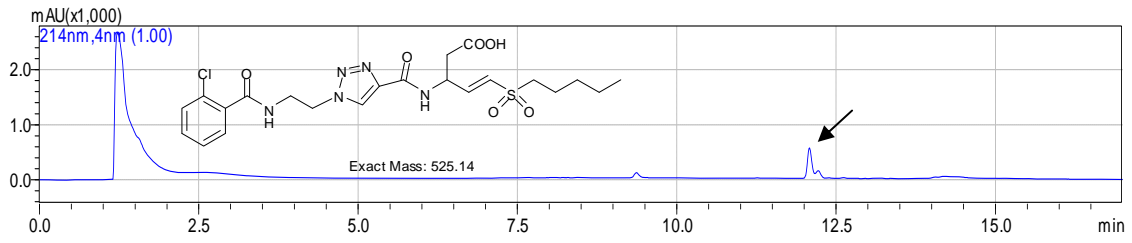

VSP-SC2:

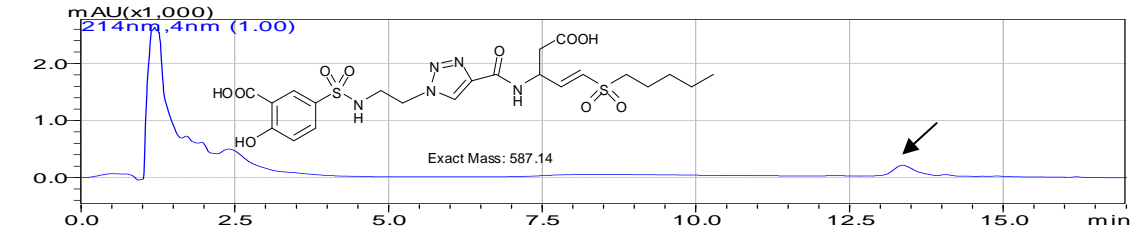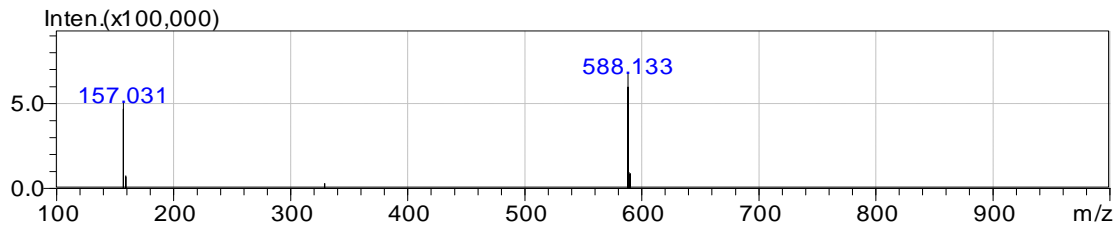

VSP-SC3:

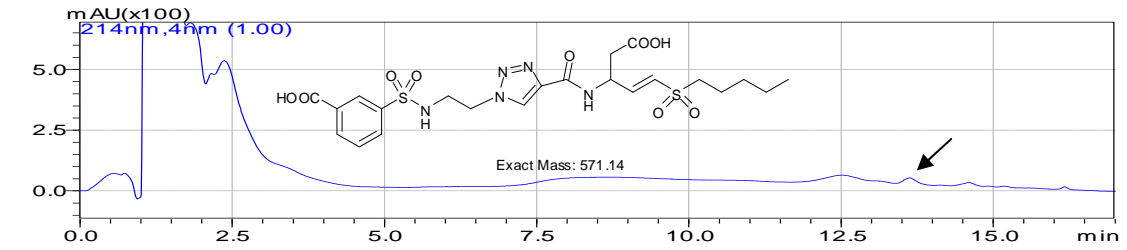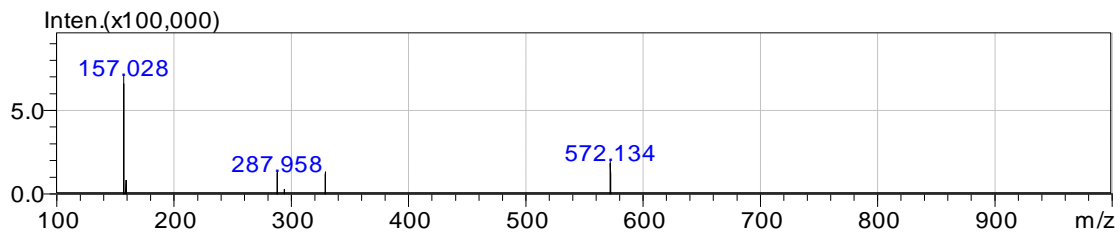

## 2.3 LC-MS profiles of aldehyde inhibitors (19)

All conditions are based on:

0 – 10 min: 5% B (1% TFA in ACN) → 20% B

10 – 15 min: 20% B (1% TFA in ACN) → 80% B

15 – 20 min: 80% B (1% TFA in ACN) → 100% B

20 – 25 min: 100% B

\* Starting materials

Ald-warhead:

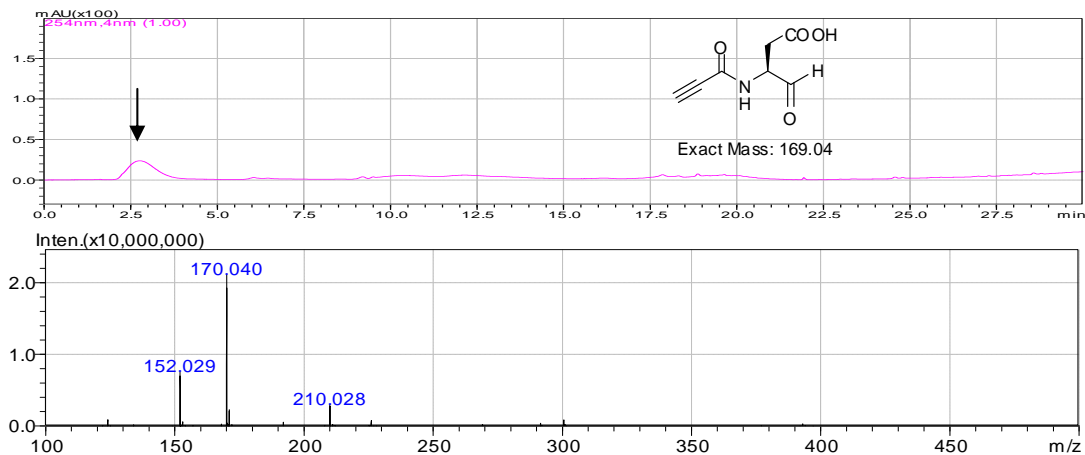

Ald-A1:

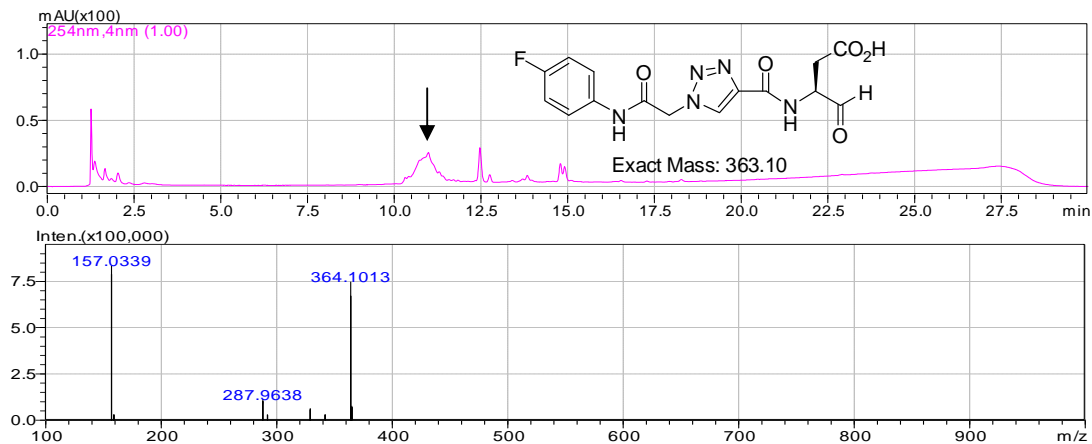

Ald-A2:

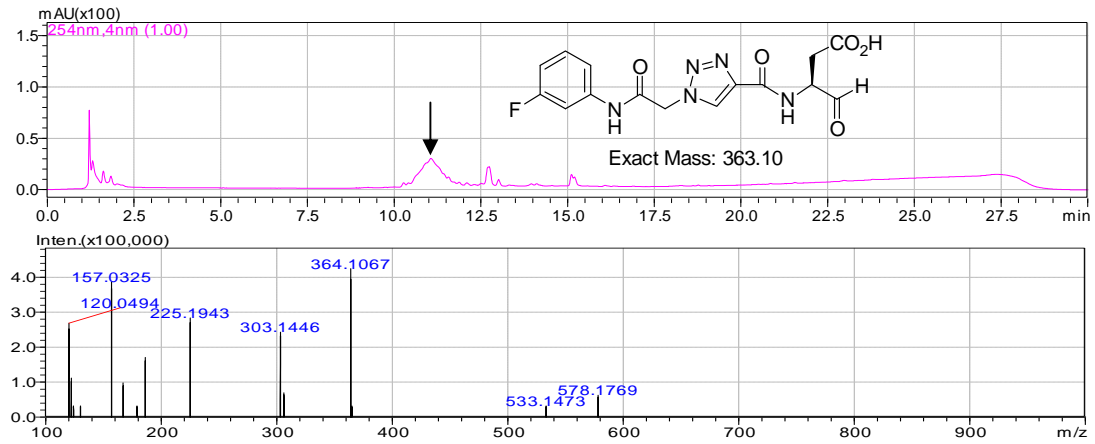

Ald-A3:

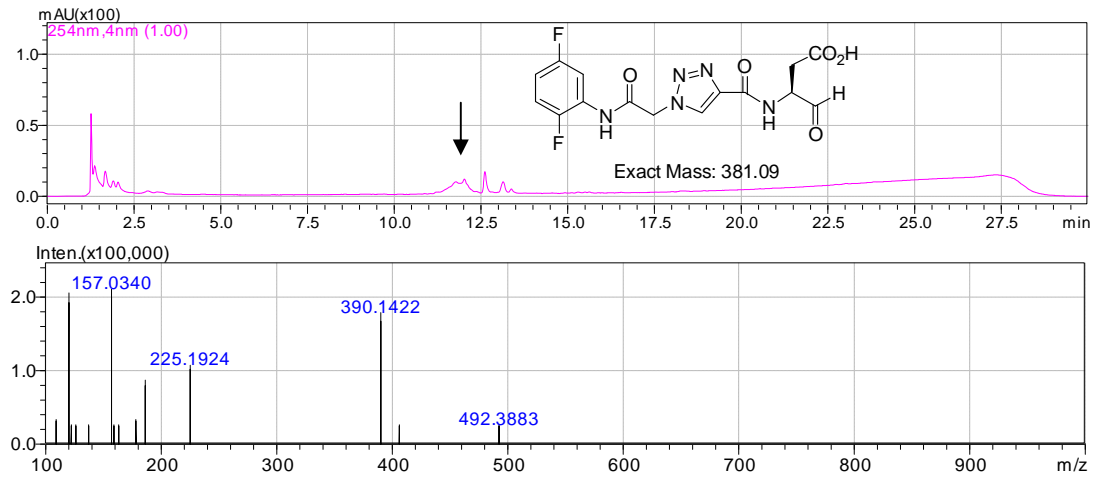

Ald-A4:

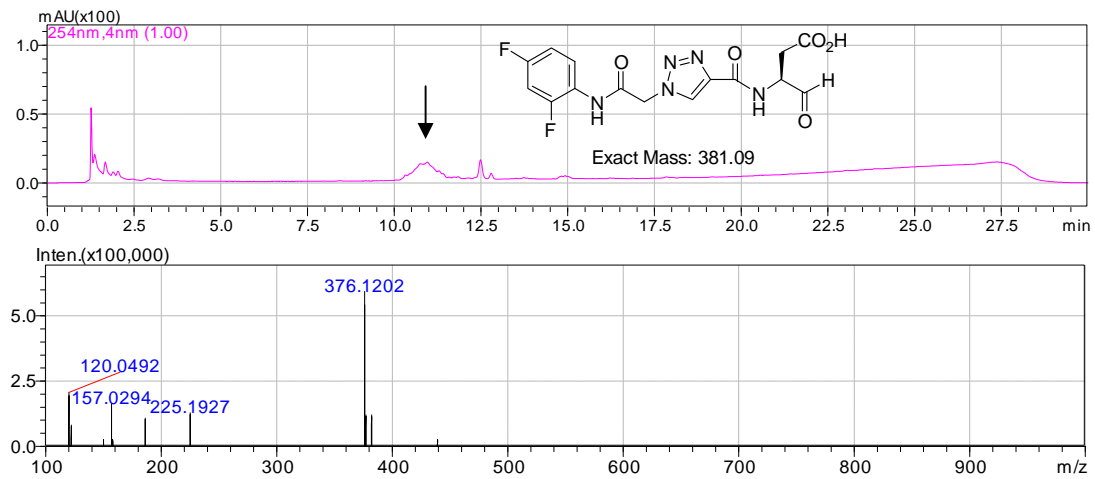

Ald-A5:

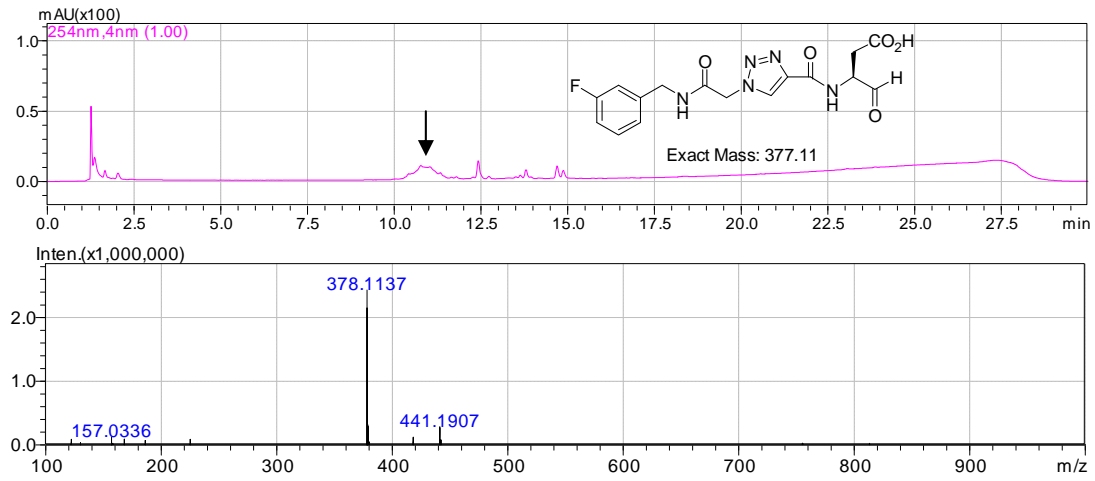

Ald-A6:

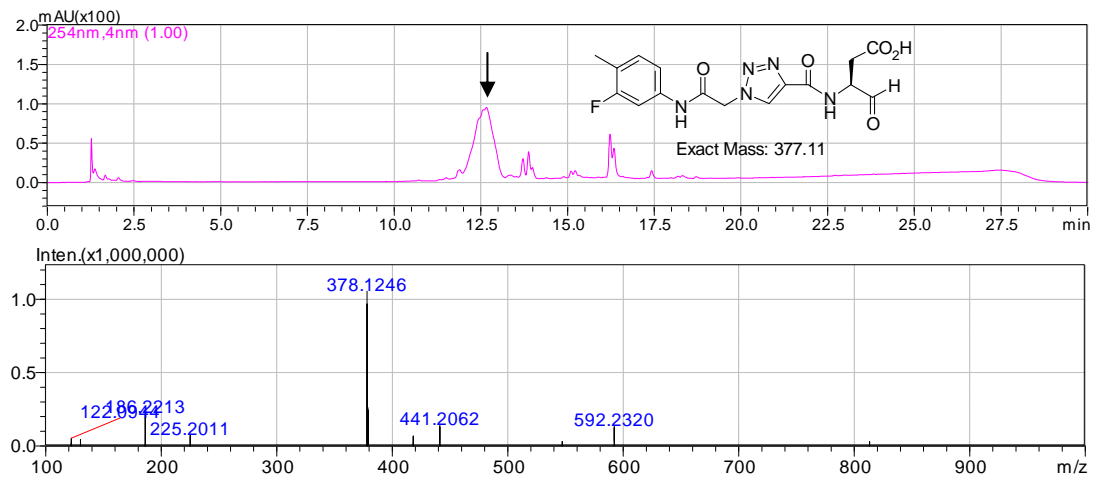

Ald-A8:

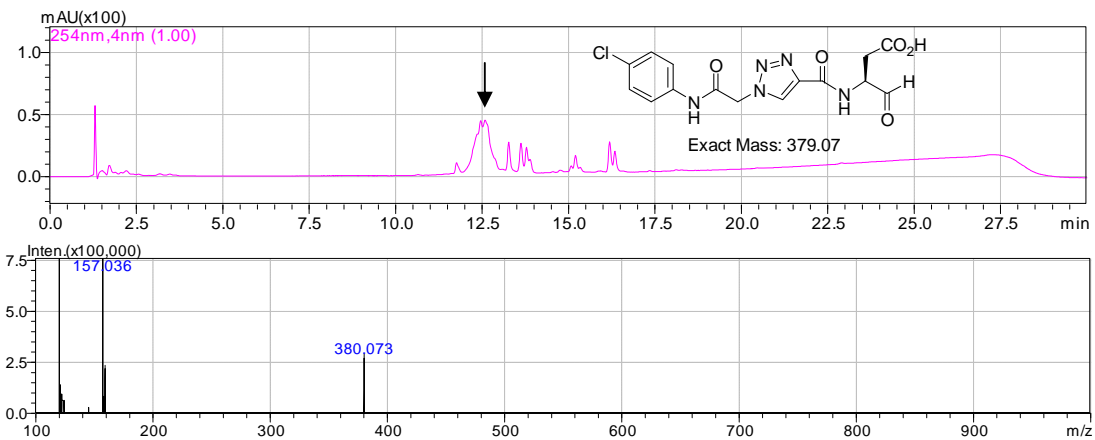

Ald-A9:

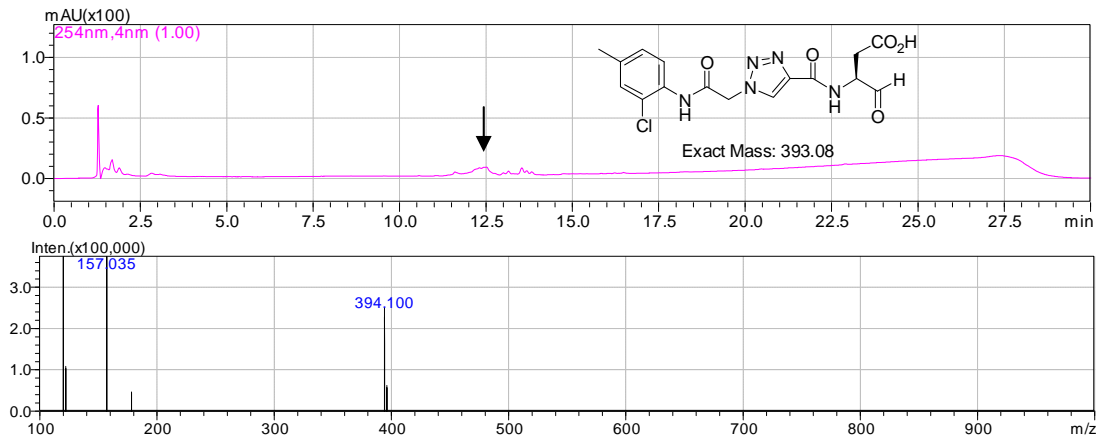

Ald-A11:

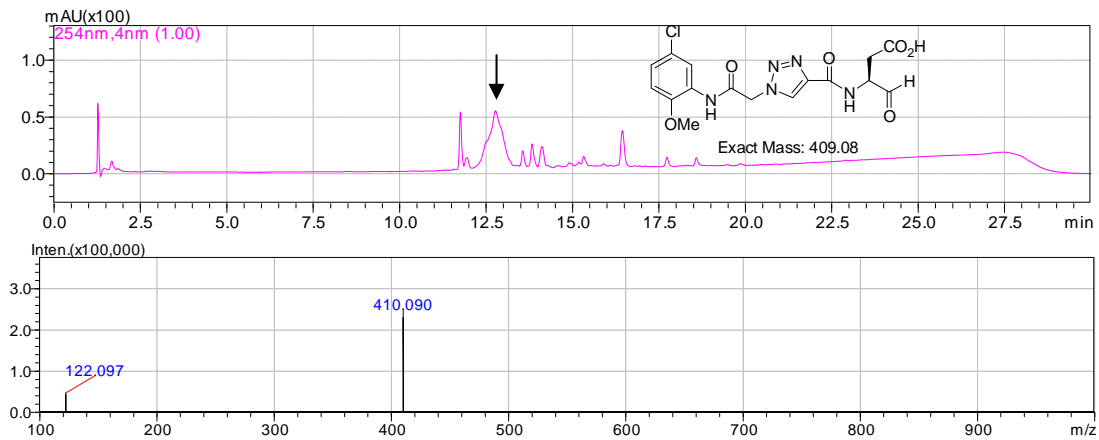

Ald-A12:

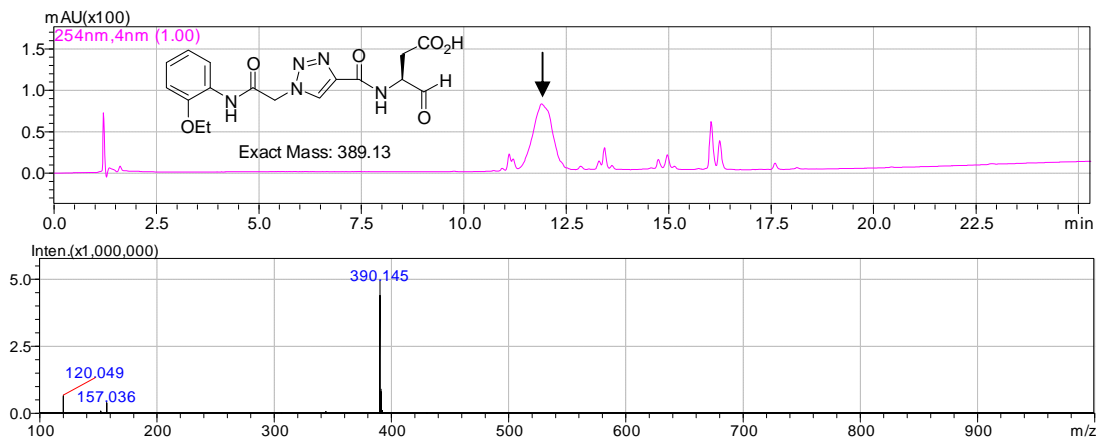

Ald-B1:

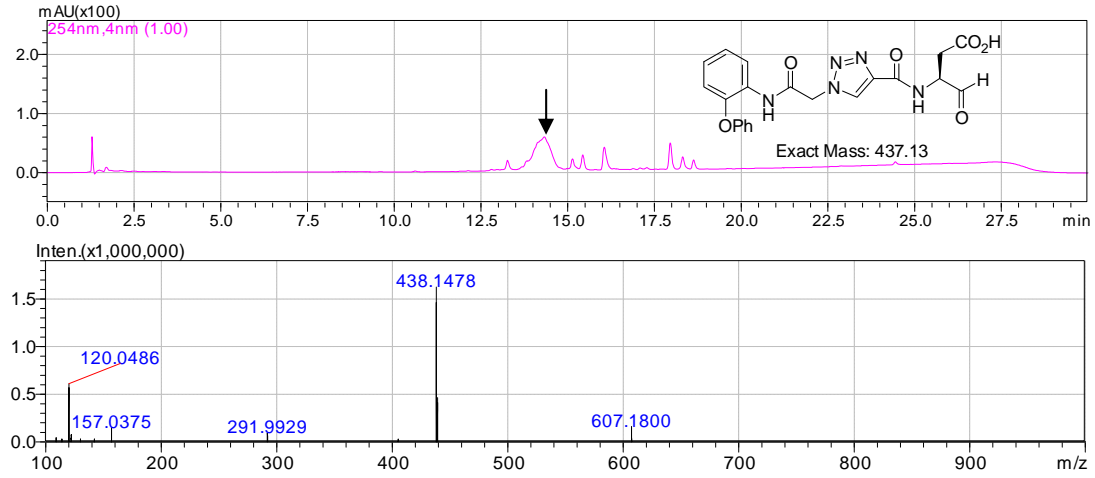

Ald-B2:

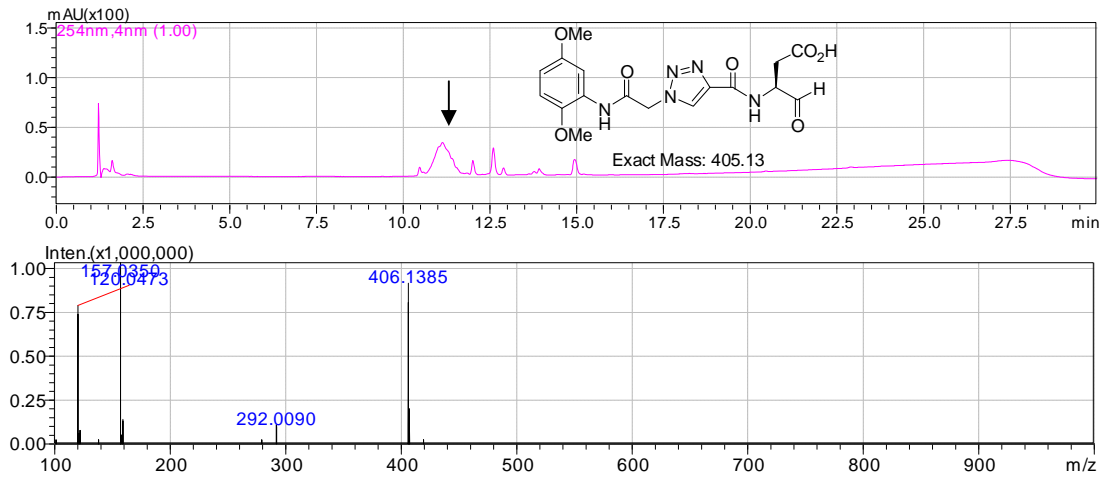

Ald-B3:

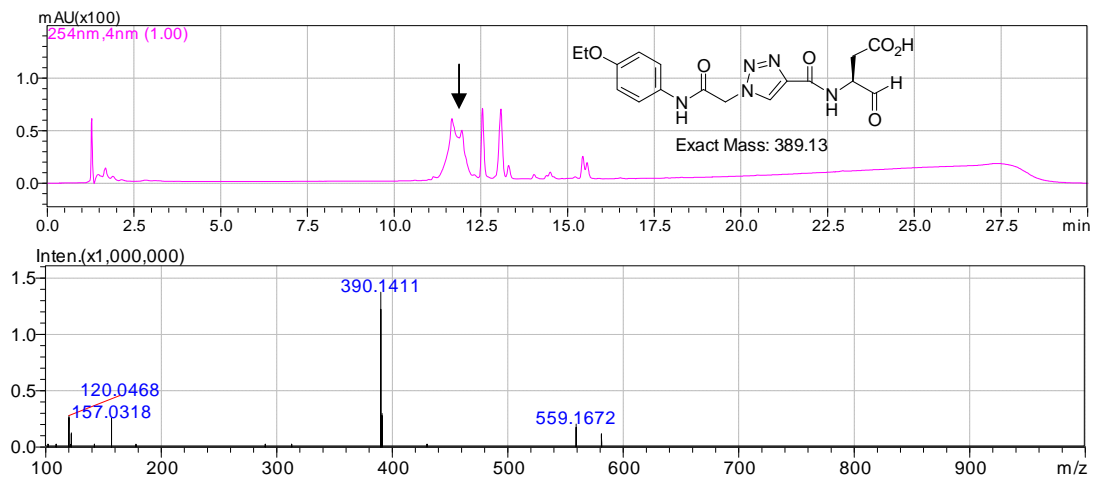

Ald-B4:

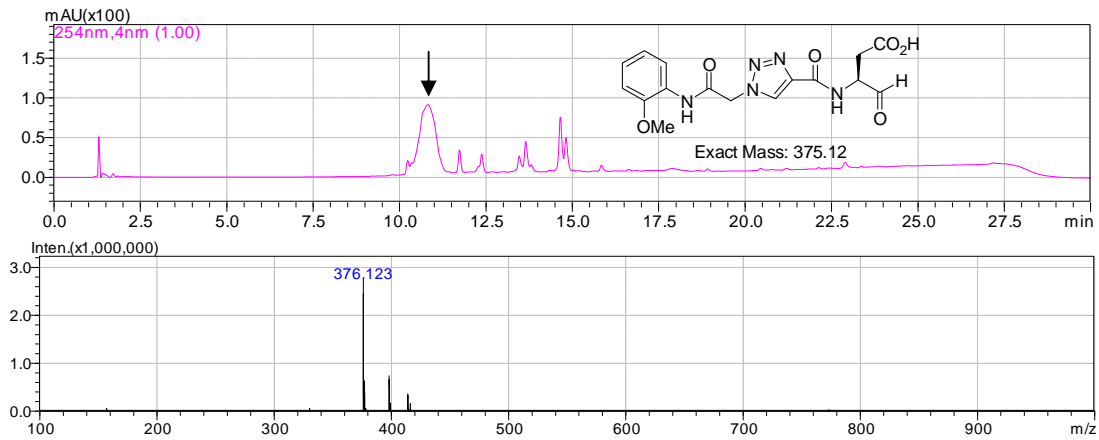

Ald-B5:

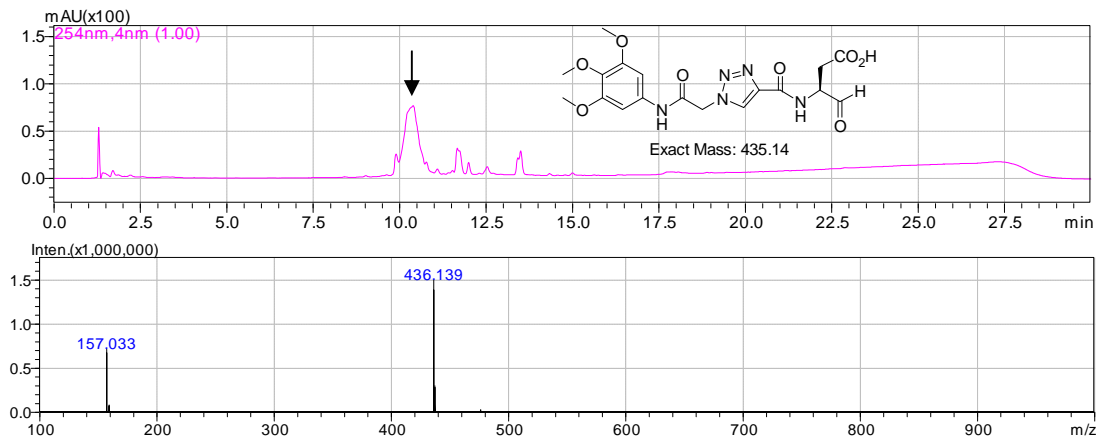

Ald-B6:

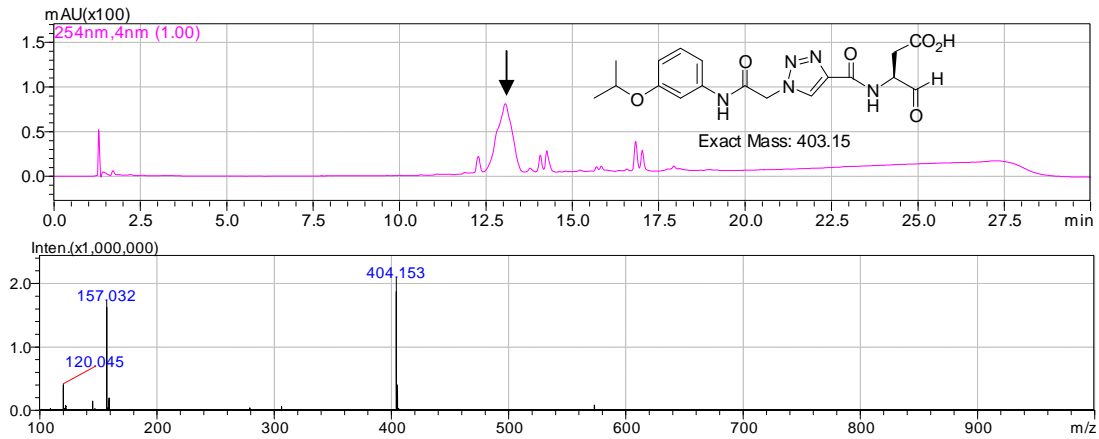

Ald-B7:

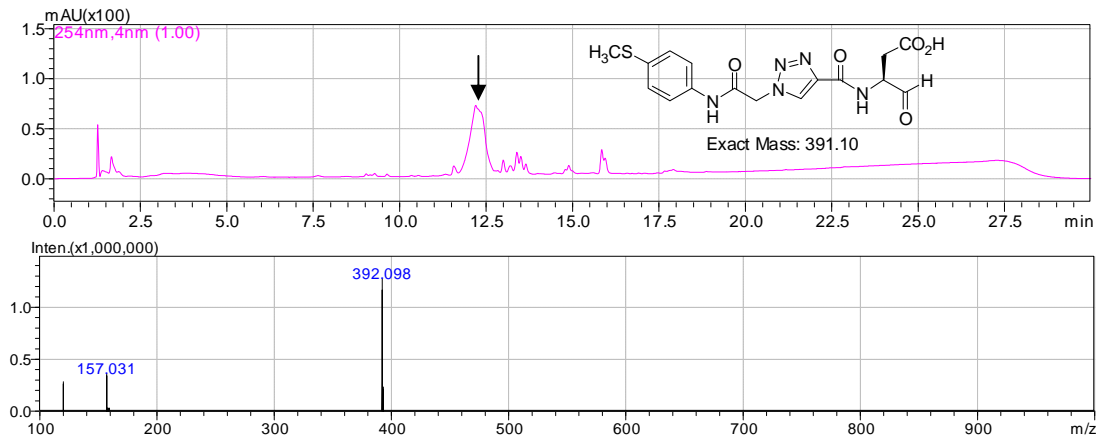

Ald-B8:

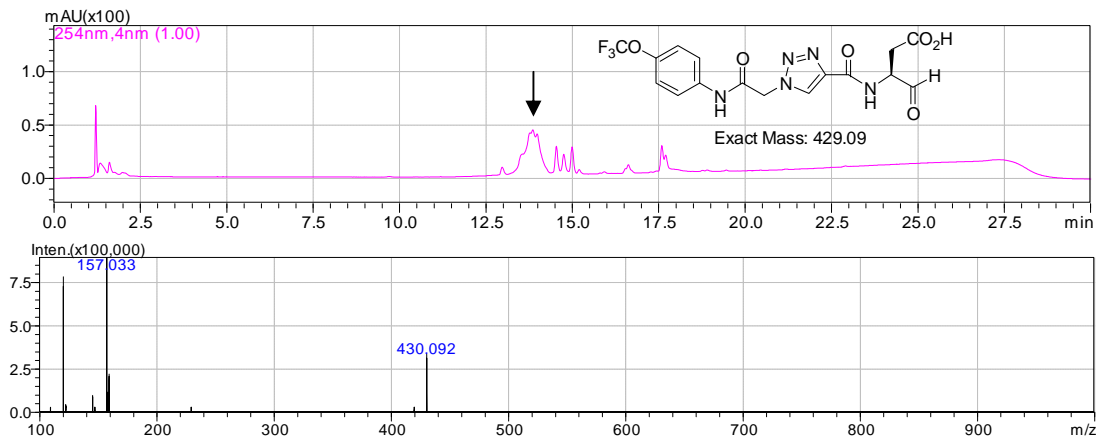

Ald-B9:

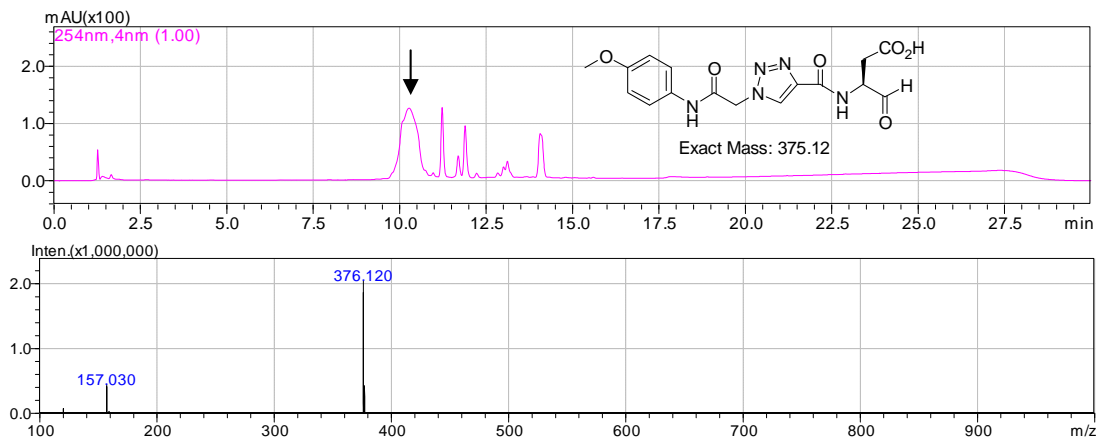



Ald-B10:

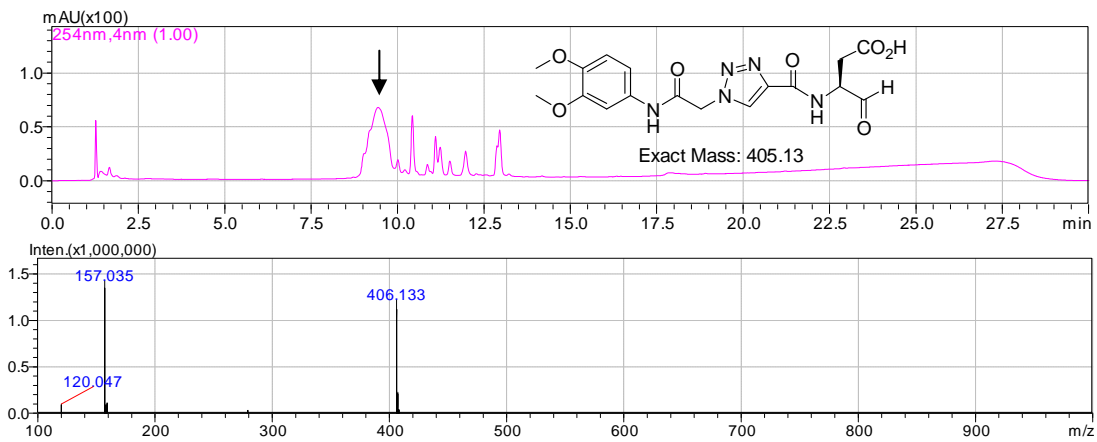

Ald-B11:

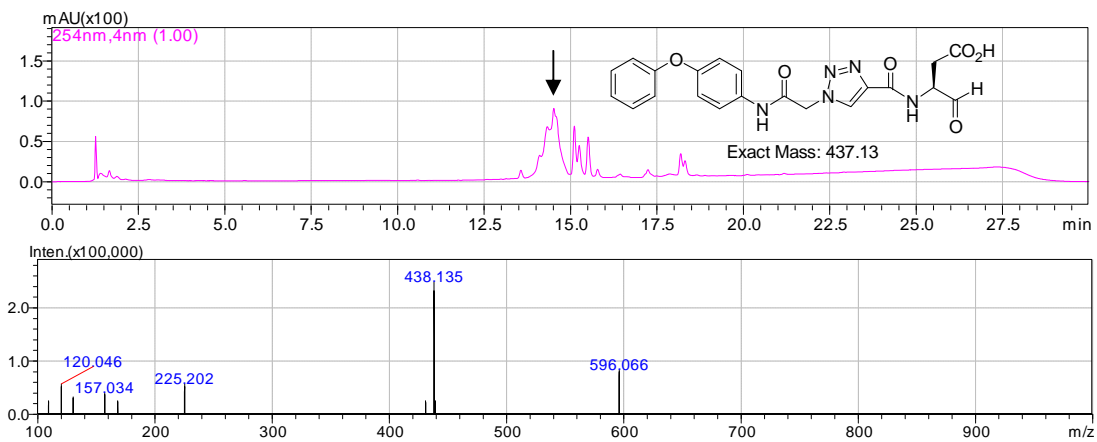

Ald-B12:

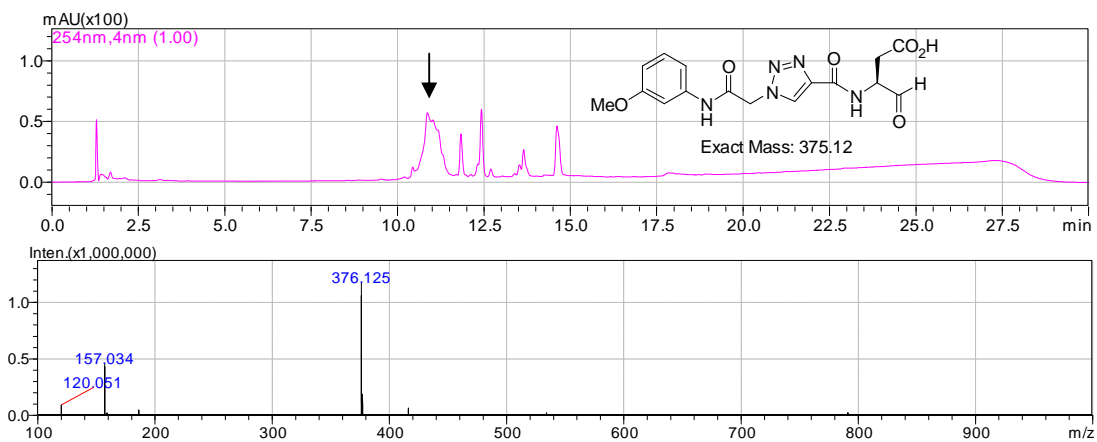

Ald-C1:

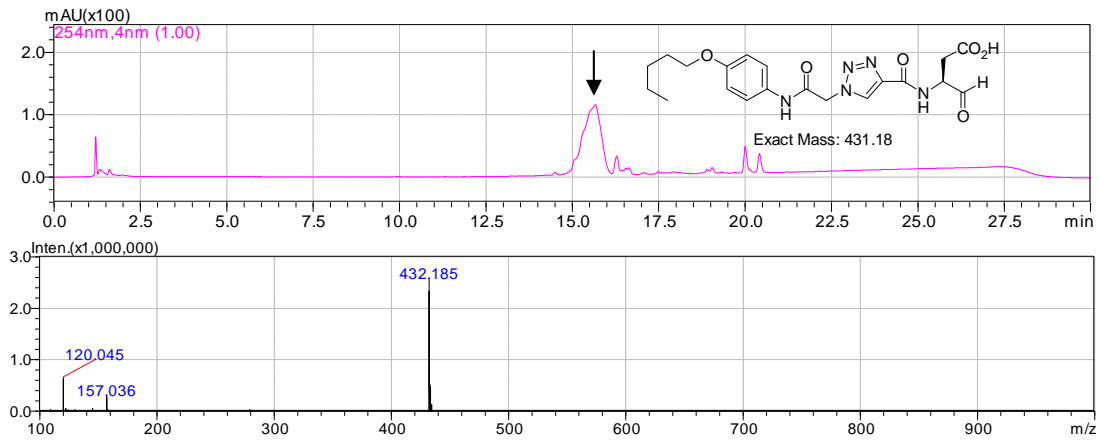

Ald-C4:

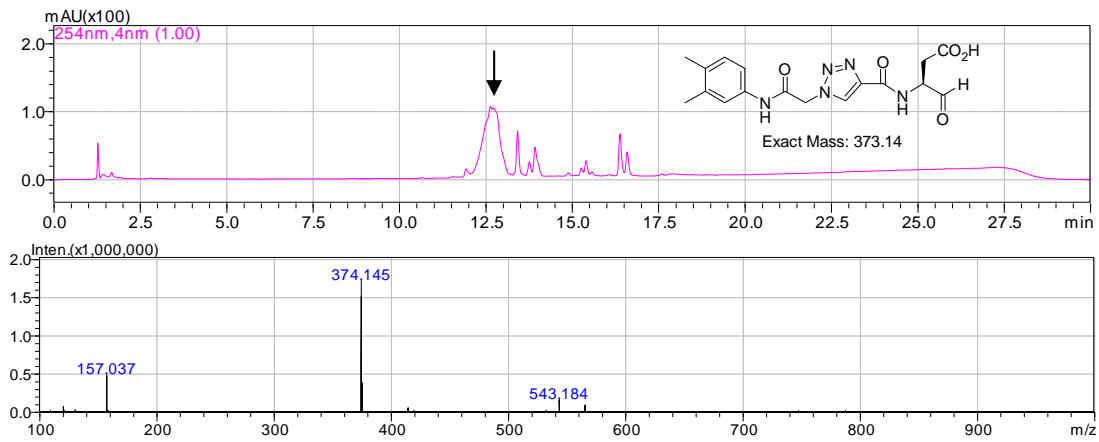

Ald-C5:

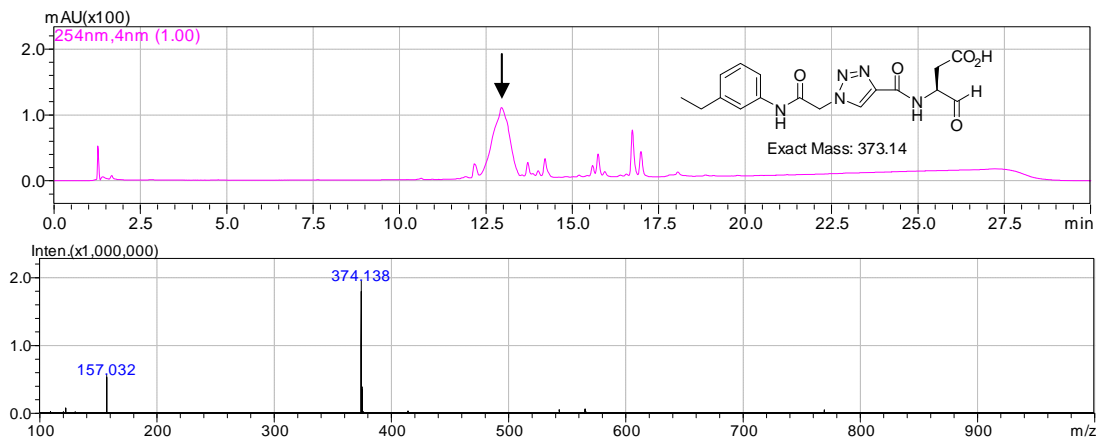

Ald-C6:

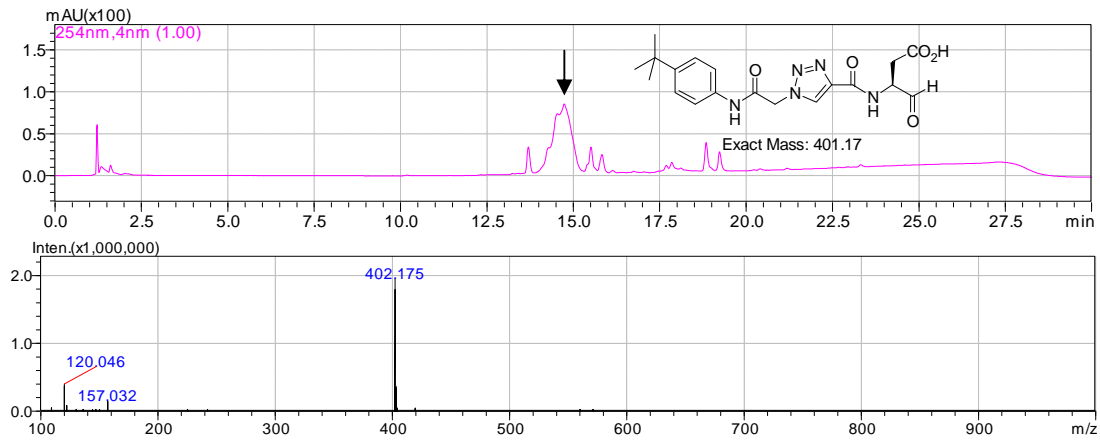

Ald-C7:

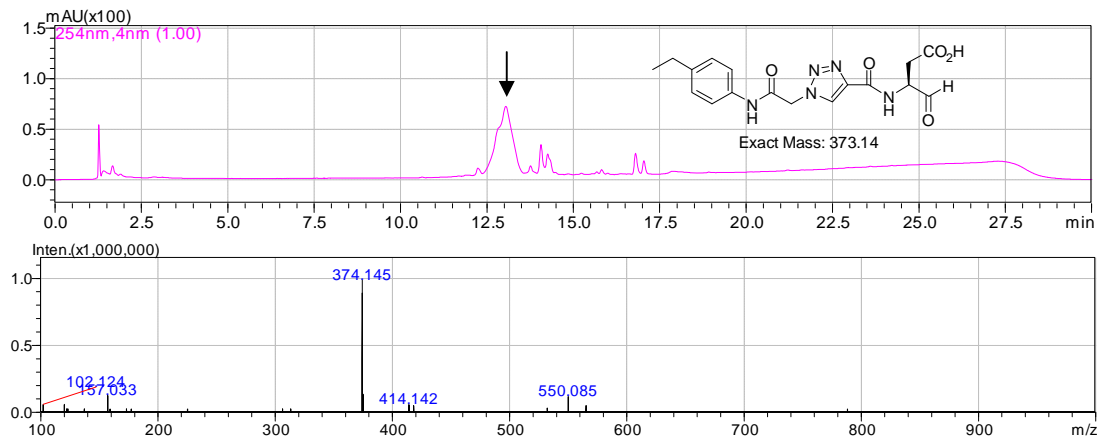

Ald-C8:

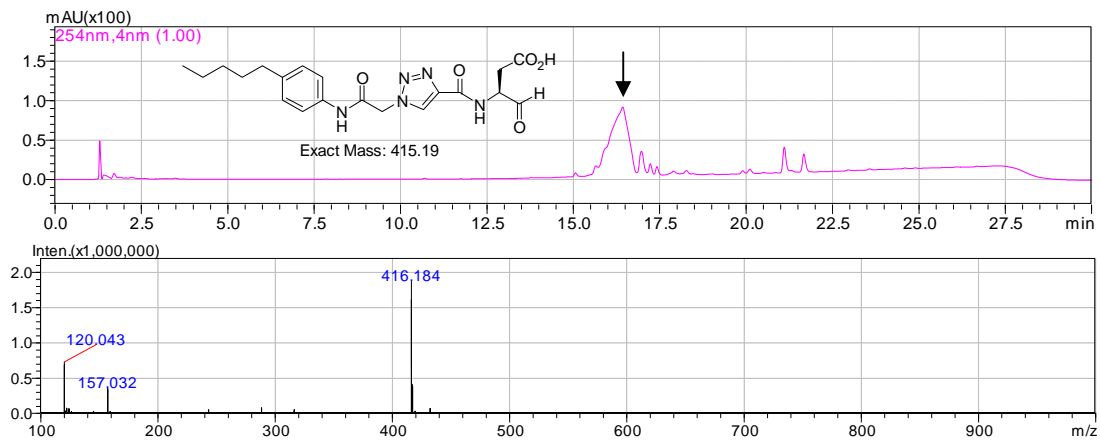

Ald-C10:

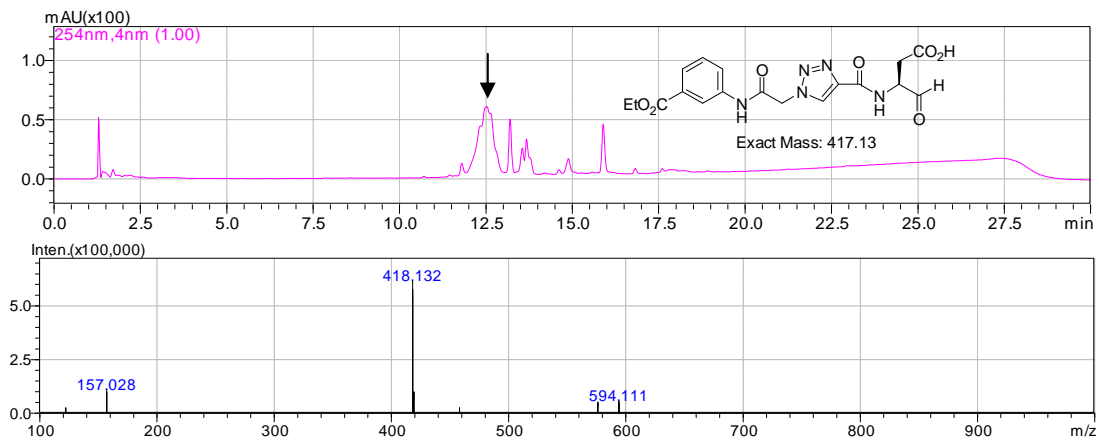

Ald-C11:

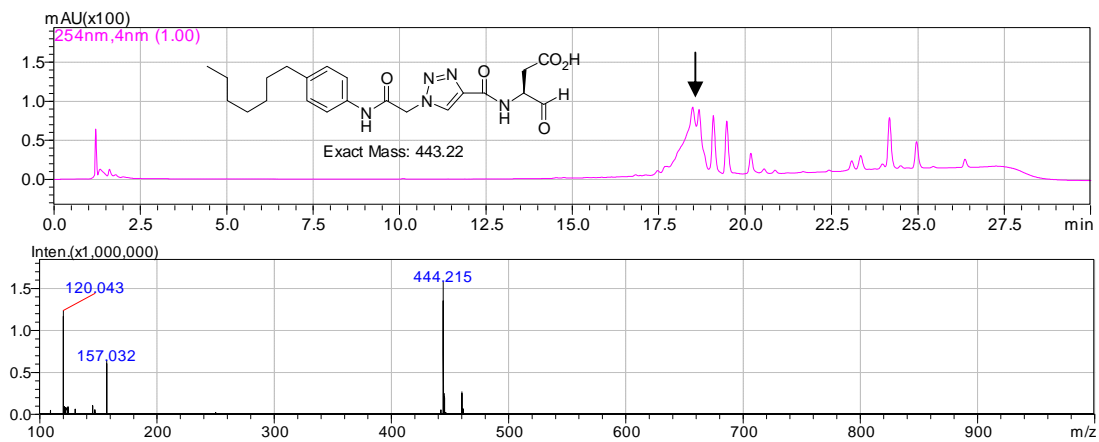

Ald-D1:

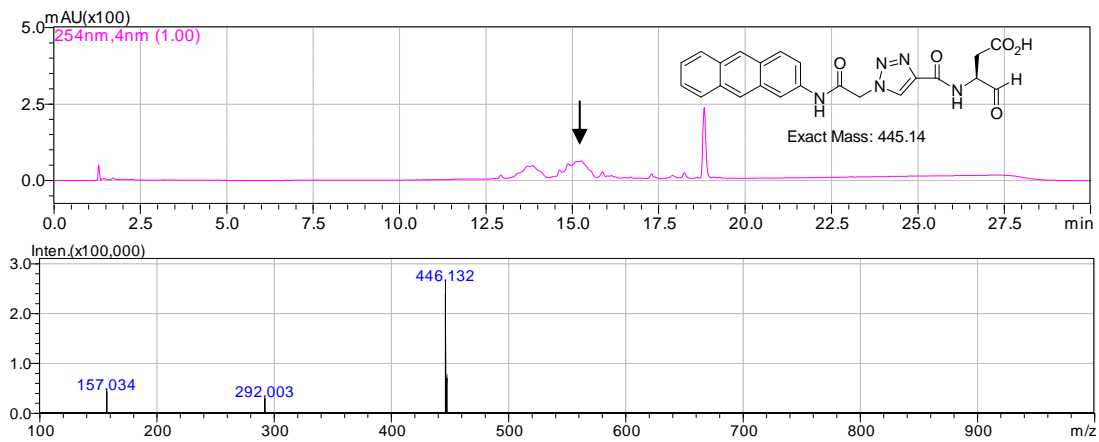

Ald-D4:

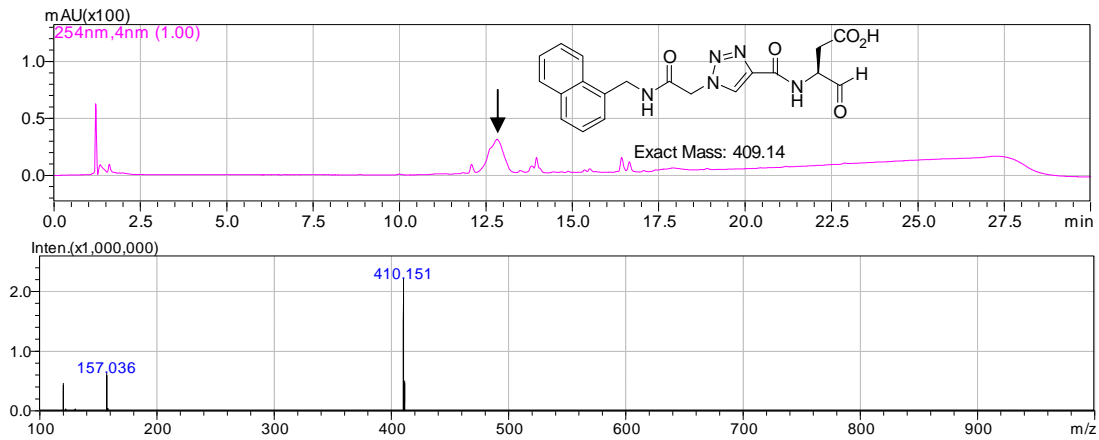

Ald-SA1:

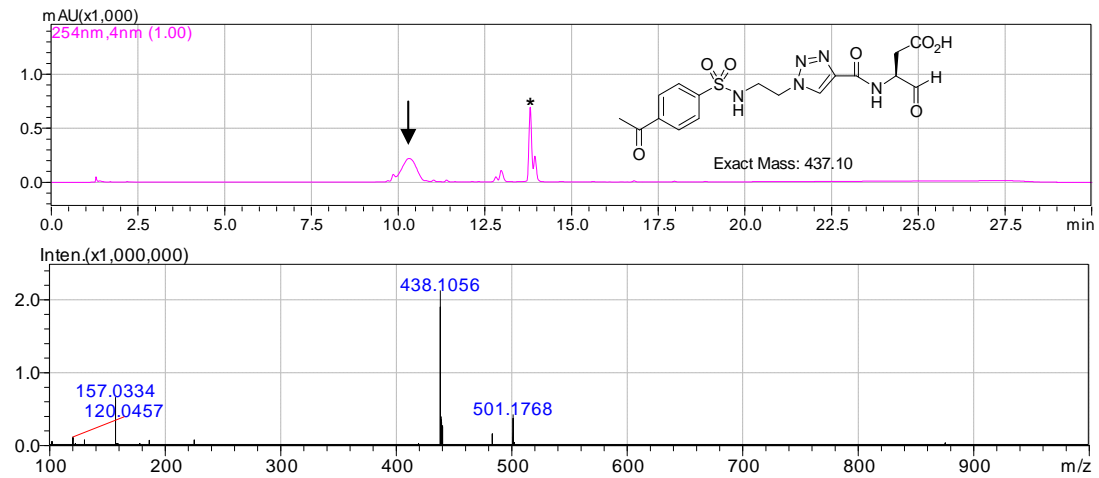

Ald-SA2:

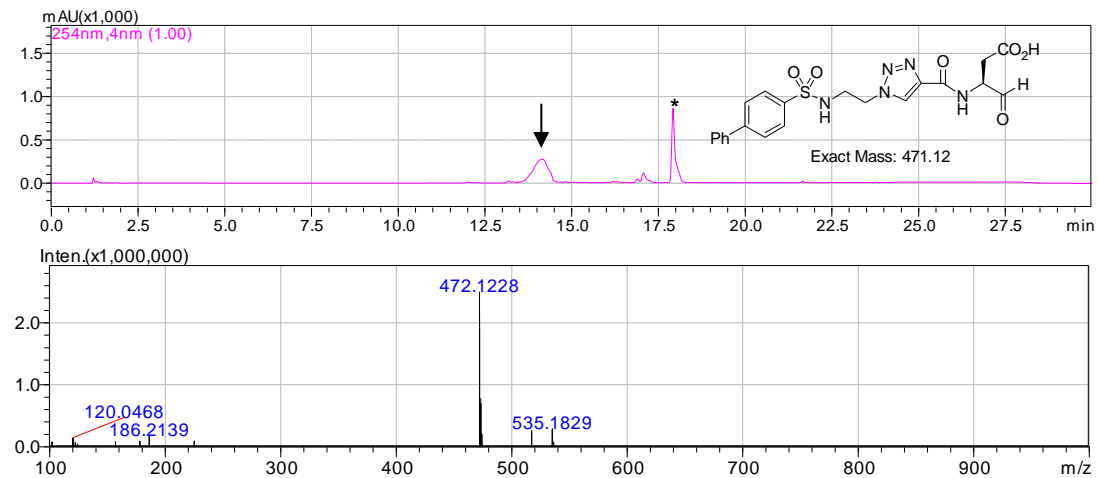

Ald-SA3:

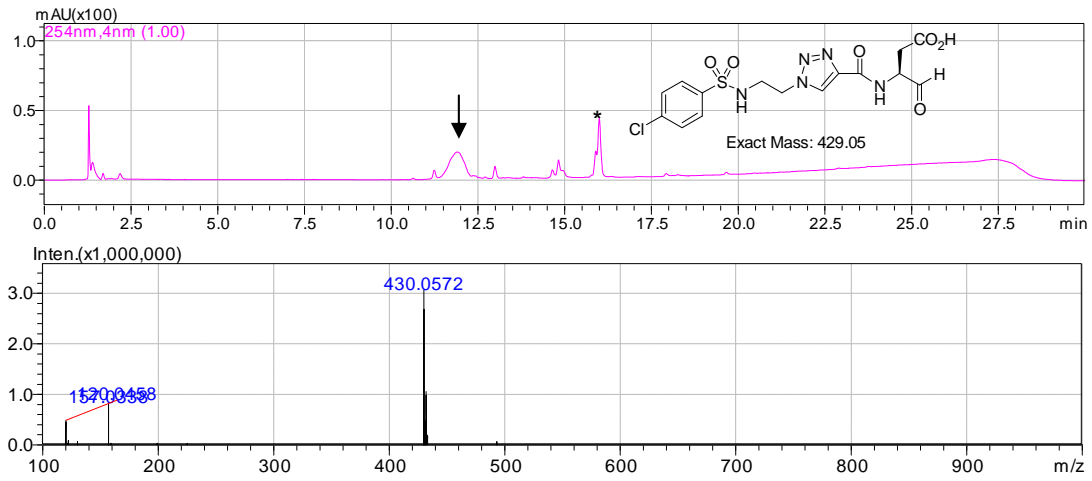

Ald-SA4:

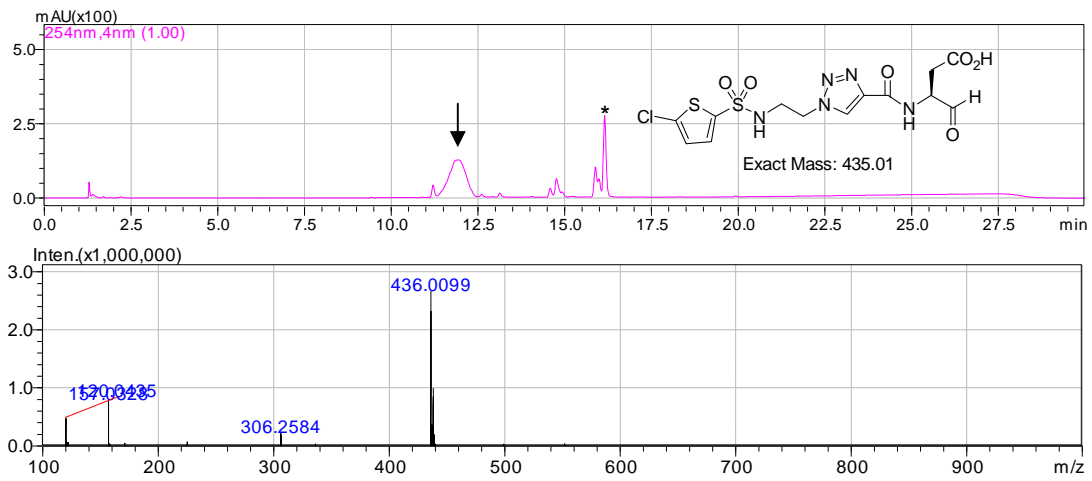

Ald-SA5:

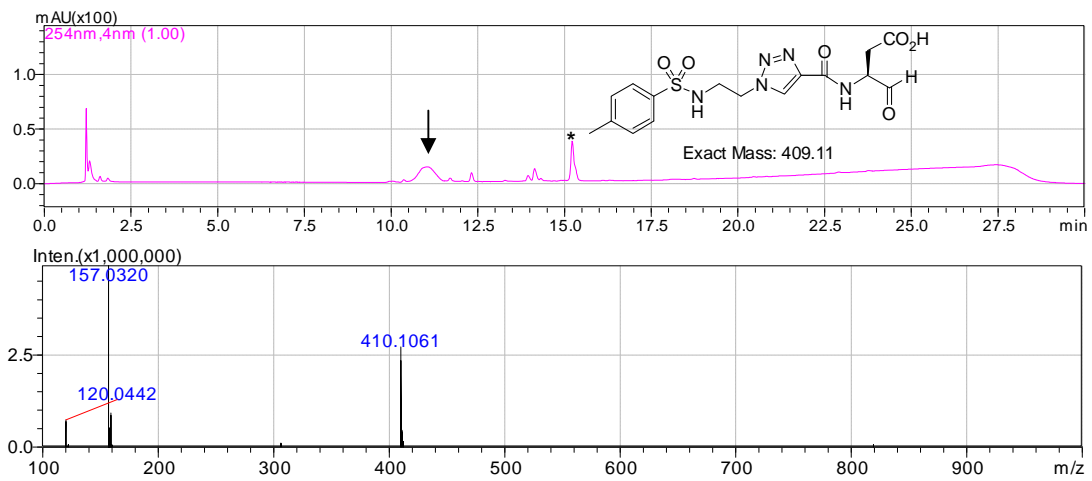

Ald-SA6:

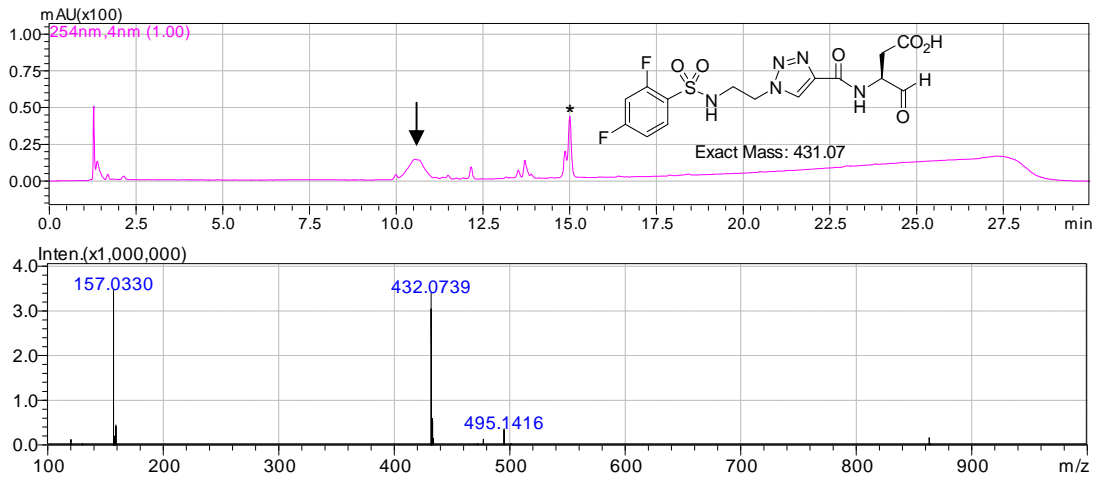

Ald-SA7:

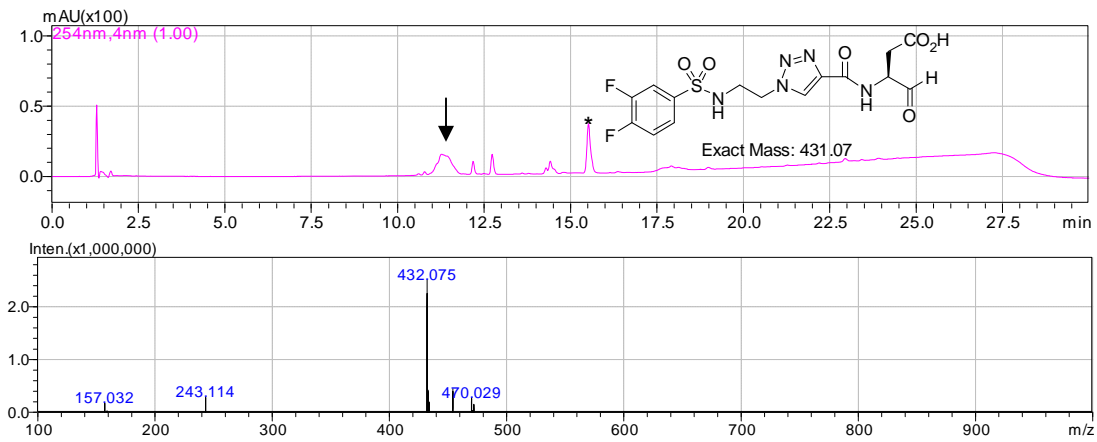

Ald-SA8:

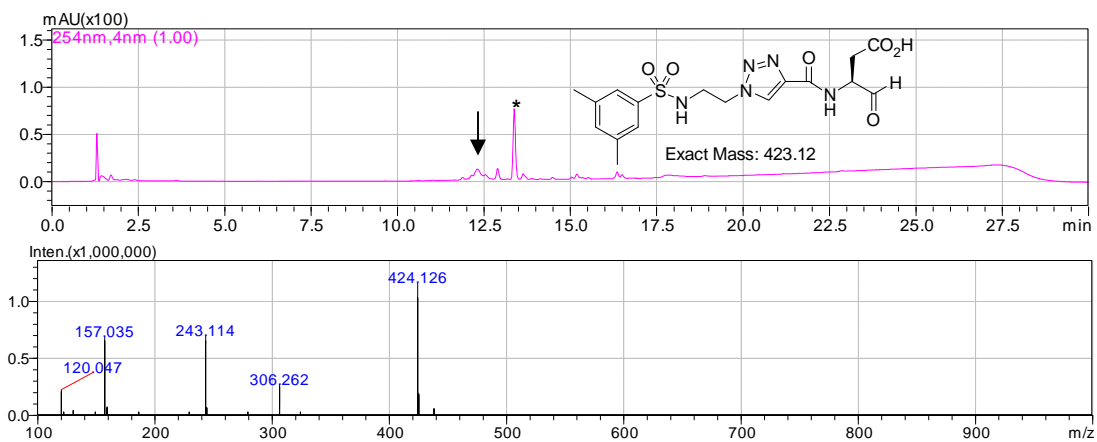

Ald-SA9:

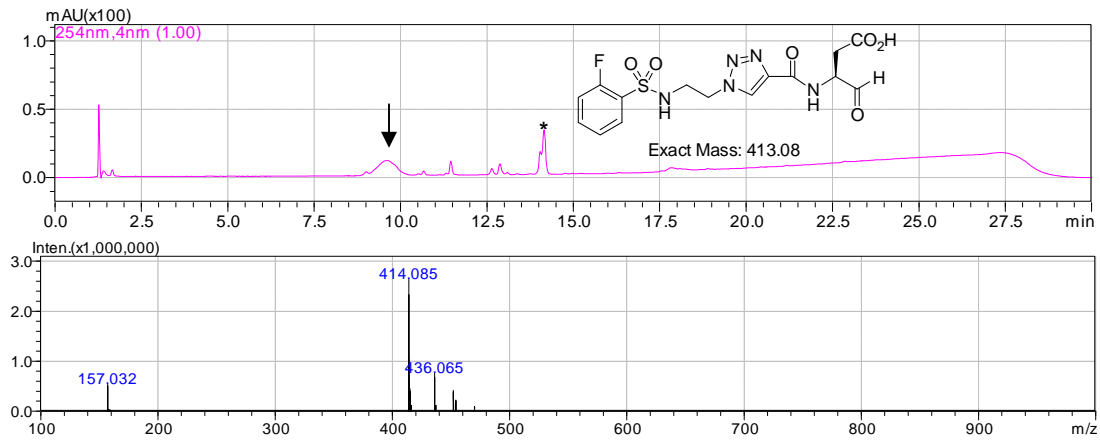

Ald-SA10:

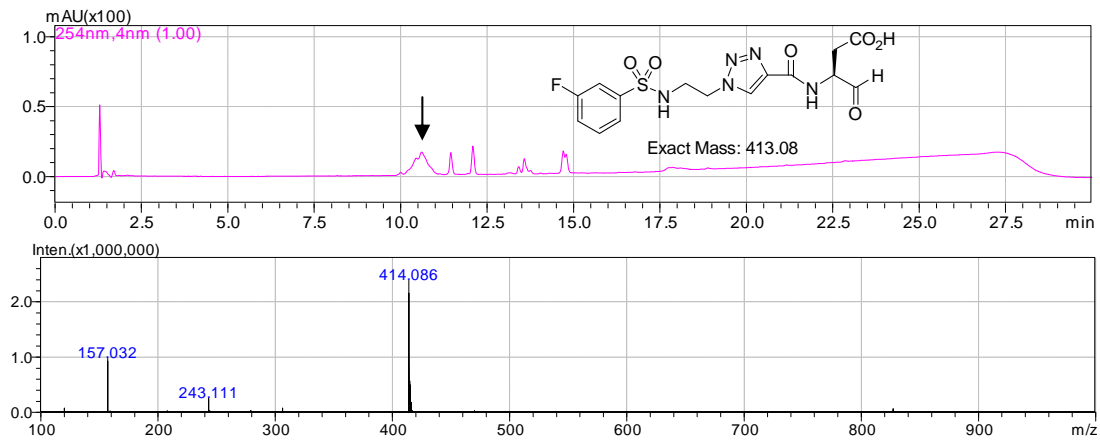

Ald-SA11:

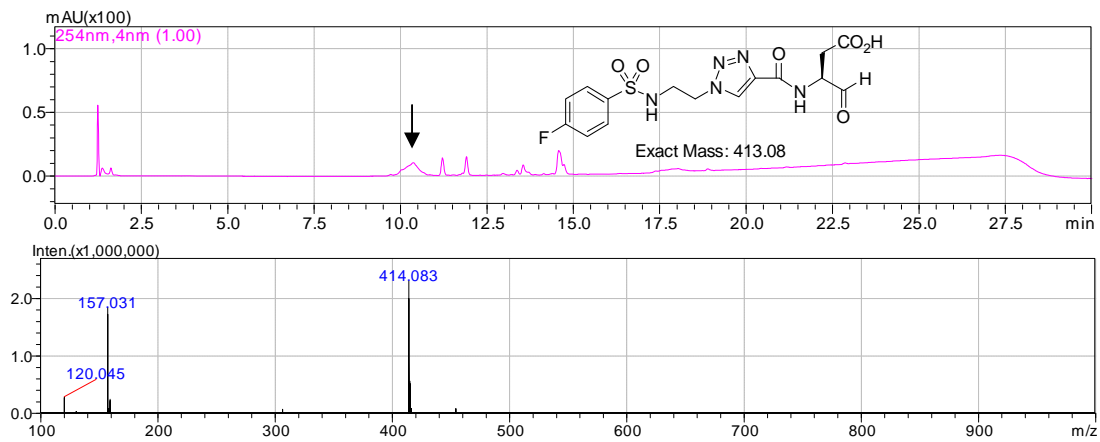



Ald-SA12:

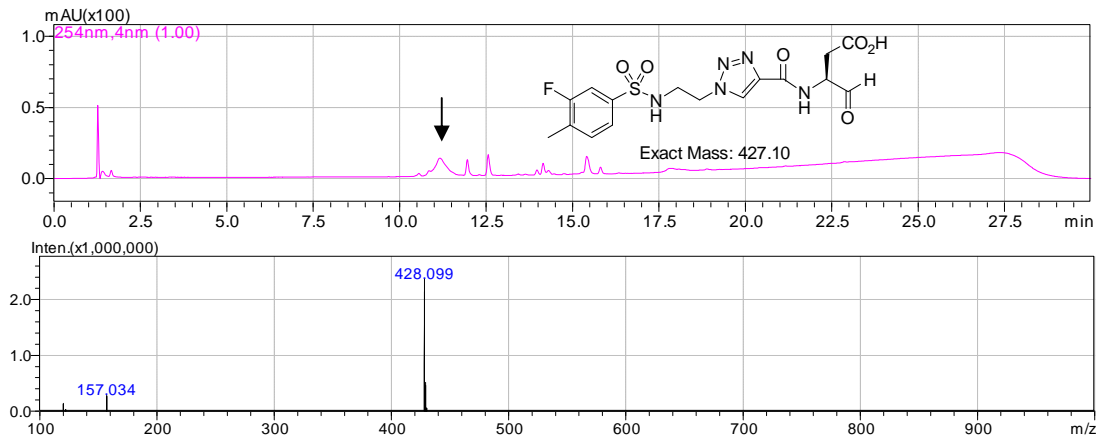

Ald-SB1:

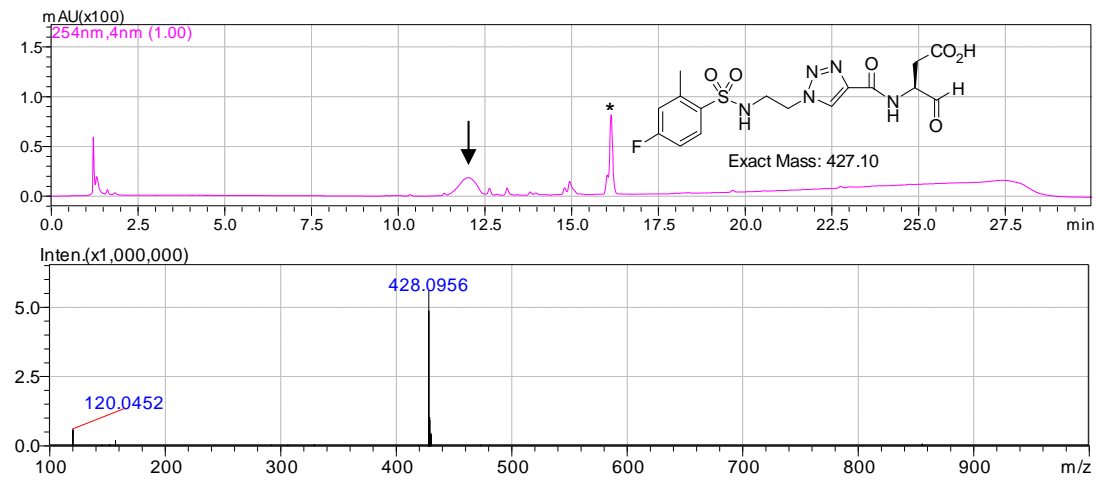

Ald-SB2:

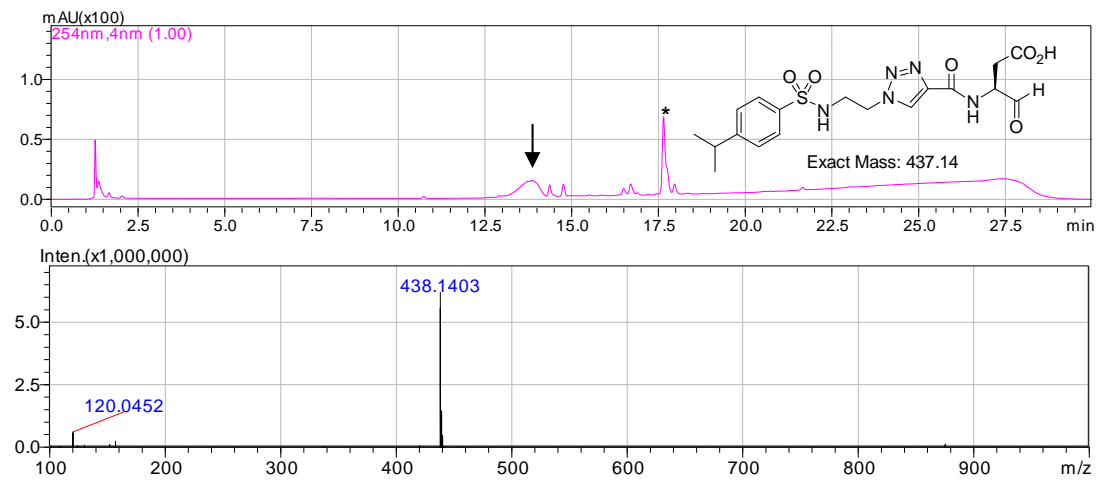

Ald-SB3:

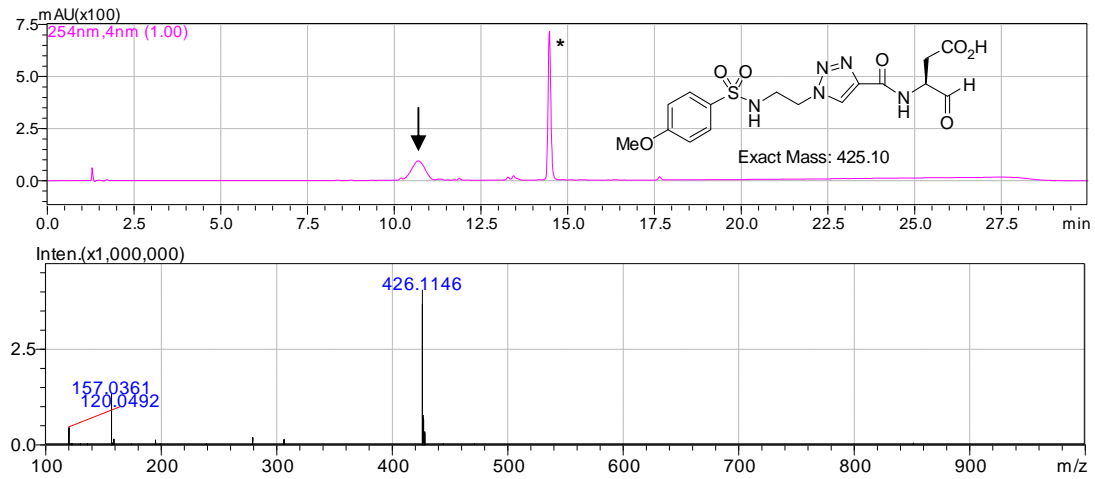

Ald-SB5:

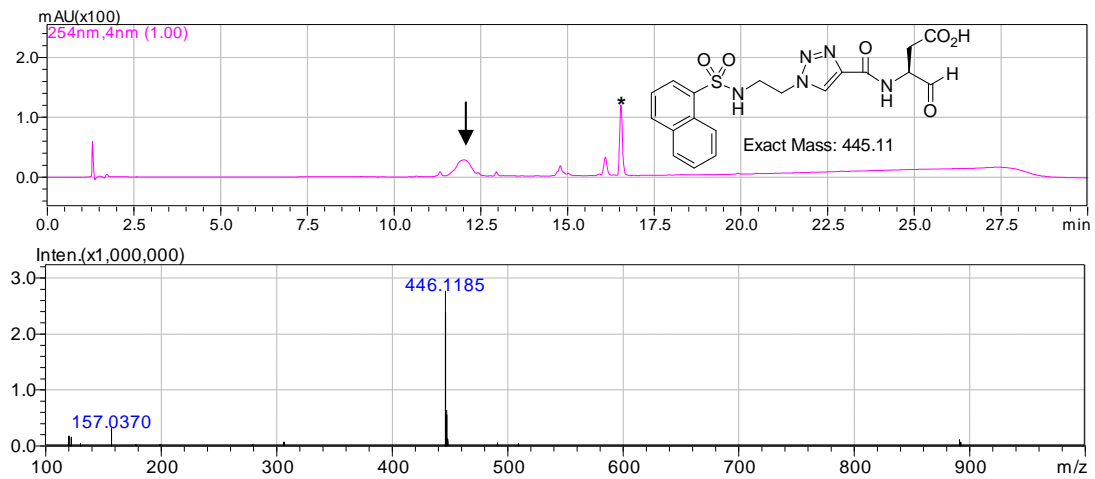

Ald-SB6:

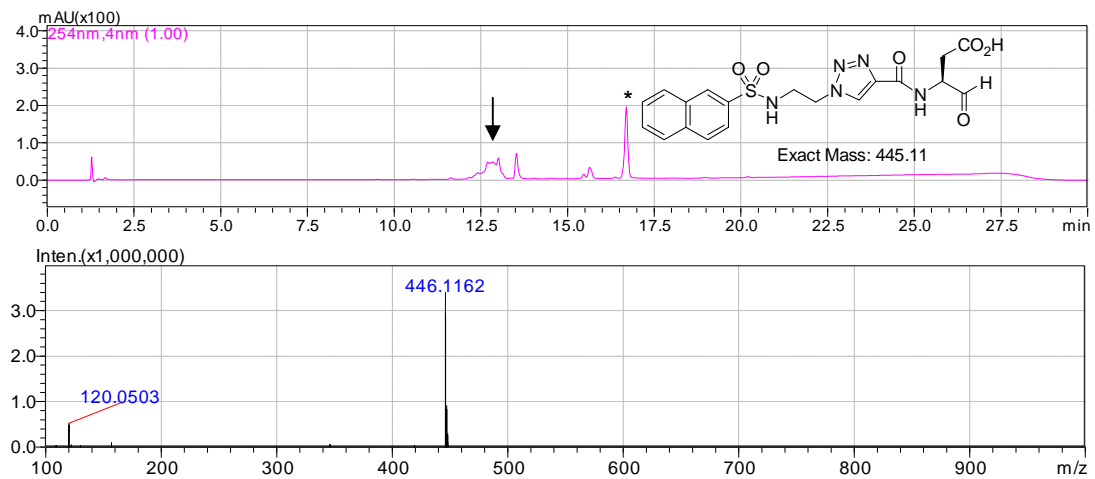

Ald-SB7:

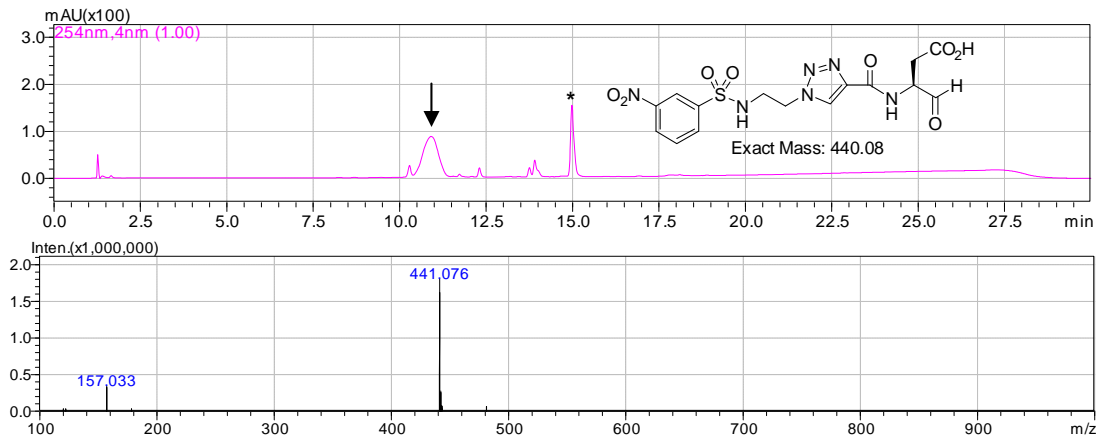

Ald-SB8:

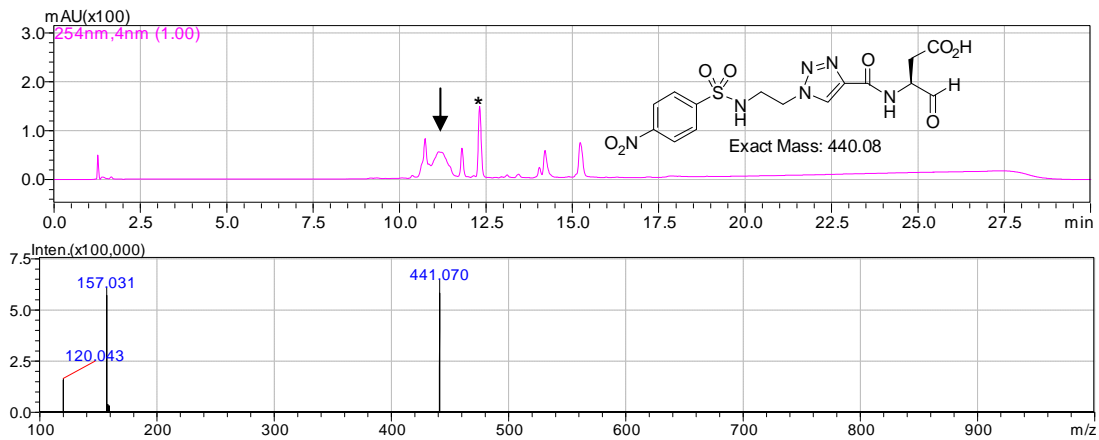

Ald-SB11:

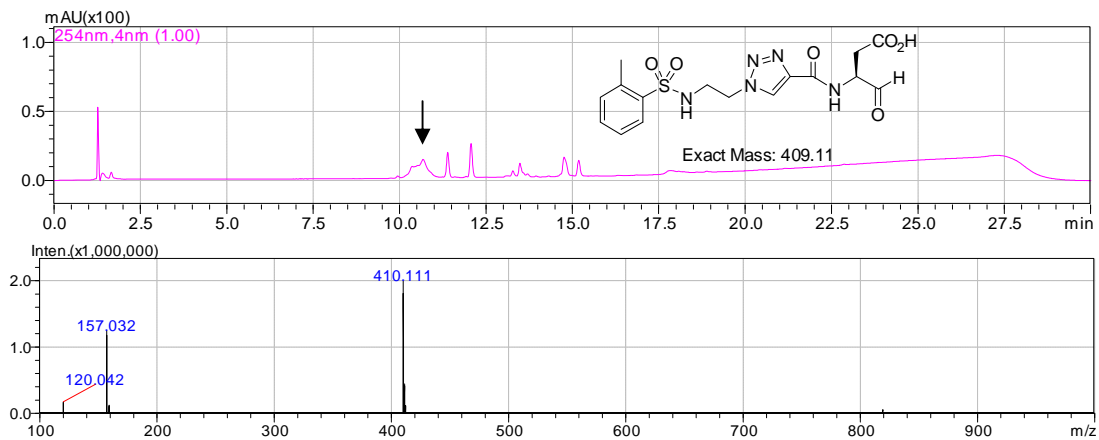

Ald-SC1:

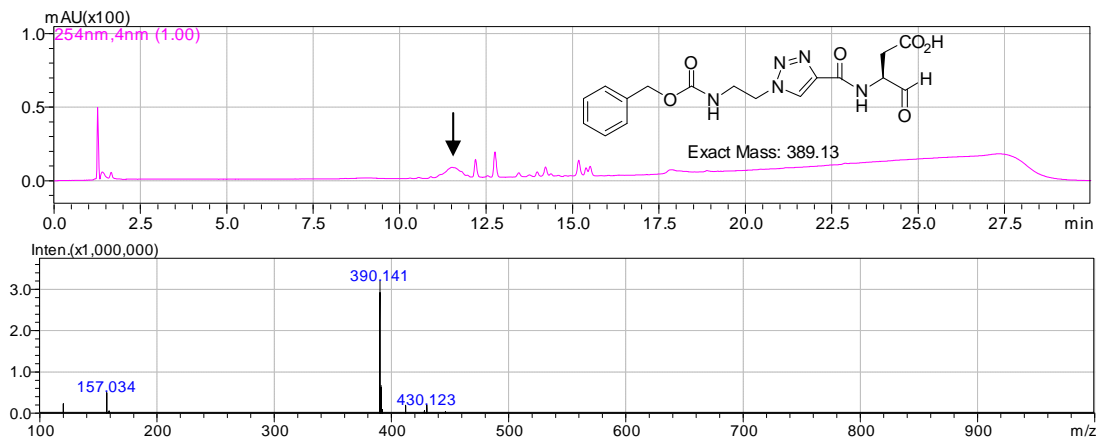

Ald-SC2:

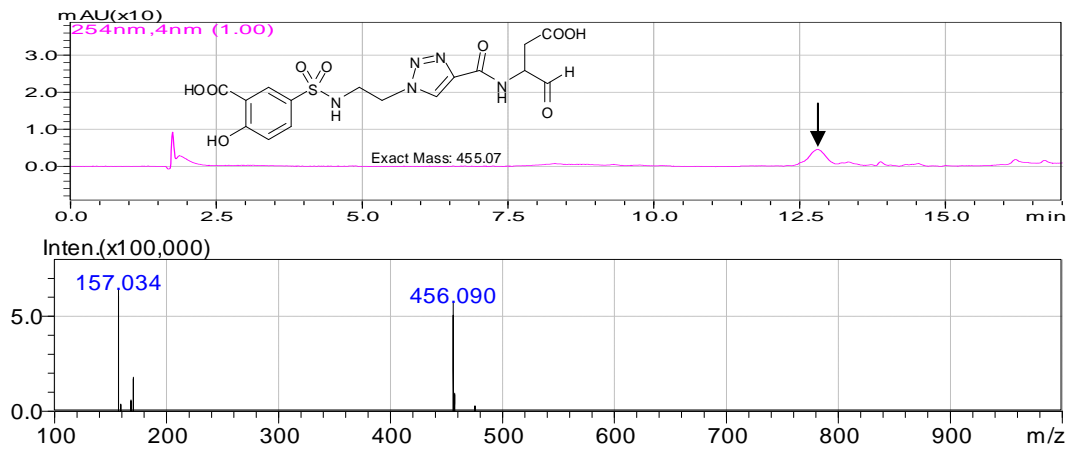

Ald-SC3:

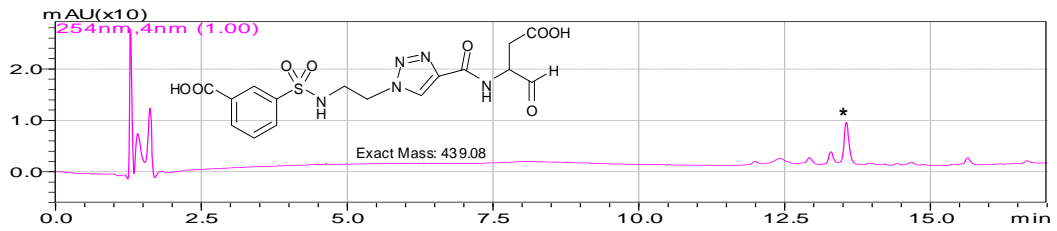

### 3. NMR Characterization of key intermediates

1H AMX500 Fmoc-Asp(OtBu)-CHO in CDCl3

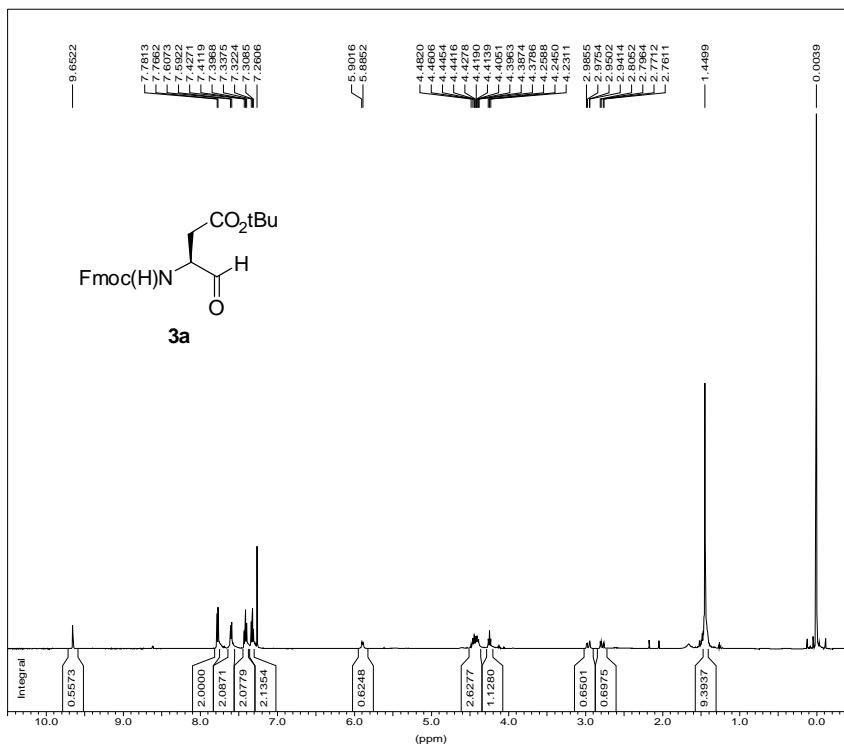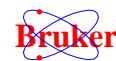

\*\*\* Current Data Parameters \*\*\*  
 NAME : py0718  
 EXPNO : 1  
 PROCNO : 1  
 \*\*\* Acquisition Parameters \*\*\*  
 NS : 32  
 PULPROG : zg30  
 RG : 143.699969  
 SFO1 : 500.1330885 MHz  
 SOLVENT : CDCl3  
 SW : 20.6557 ppm  
 TD : 32768  
 TE : 295.1 K  
 \*\*\* Processing Parameters \*\*\*  
 LB : 0.30 Hz  
 WDW : EM

13C AMX500 Fmoc-Asp(OtBu)-CHO in CDCl3

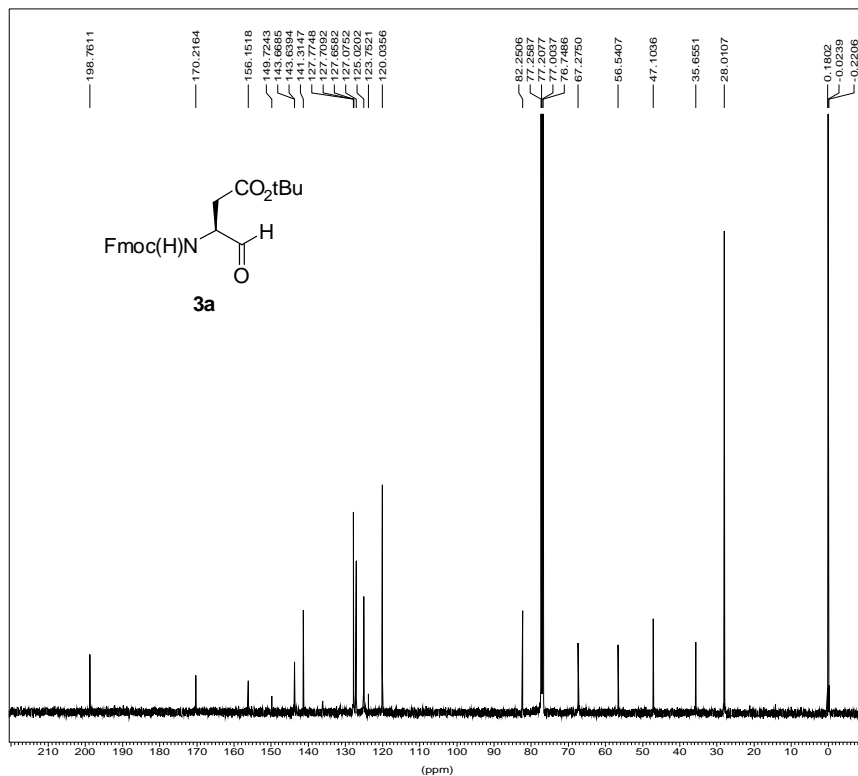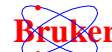

\*\*\* Current Data Parameters \*\*\*  
 NAME : py0718  
 EXPNO : 2  
 PROCNO : 1  
 \*\*\* Acquisition Parameters \*\*\*  
 NS : 1606  
 PULPROG : zgpg30  
 RG : 16384.000000  
 SFO1 : 125.7709936 MHz  
 SOLVENT : CDCl3  
 SW : 238.7675 ppm  
 TD : 65536  
 TE : 295.2 K  
 \*\*\* Processing Parameters \*\*\*  
 LB : 1.00 Hz  
 WDW : EM

1H AMX500 Fmoc-Asp(OtBu)-CH(OMe)2 in CDCl3

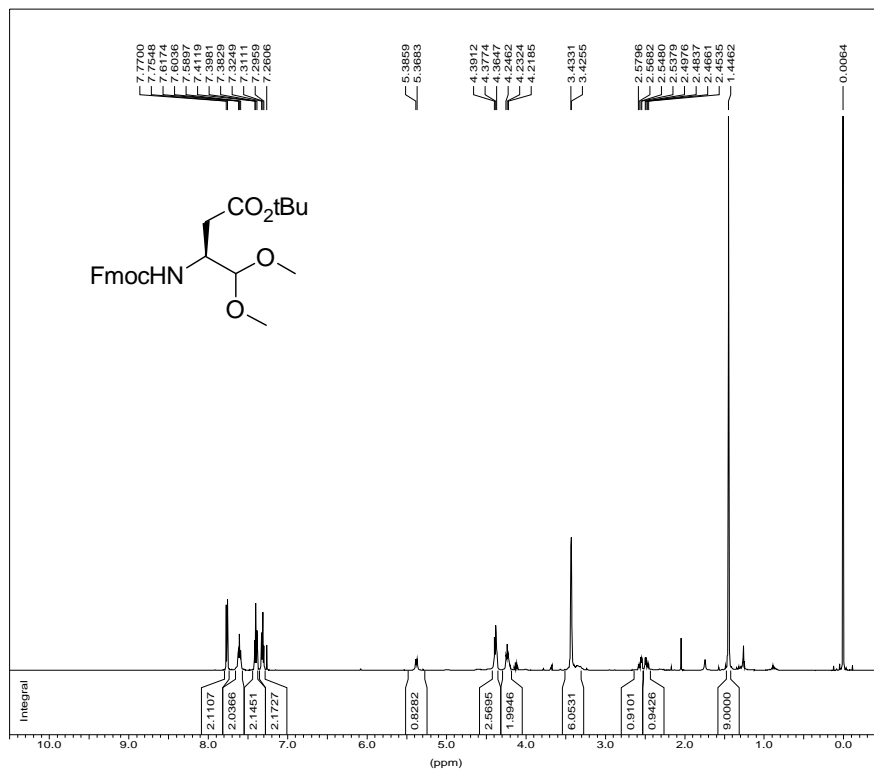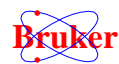

\*\*\* Current Data Parameters \*\*\*

NAME : py0718  
 EXPNO : 3  
 PROCNO : 1  
 \*\*\* Acquisition Parameters \*\*\*  
 NS : 8  
 PULPROG : zg30  
 RG : 64.000000  
 SFO1 : 500.1330885 MHz  
 SOLVENT : CDCl3  
 SW : 20.6557 ppm  
 TD : 32768  
 TE : 295.2 K  
 \*\*\* Processing Parameters \*\*\*  
 LB : 0.30 Hz  
 WDW : EM

13C AMX500 Fmoc-Asp(OtBu)-CH(OMe)2 in CDCl3

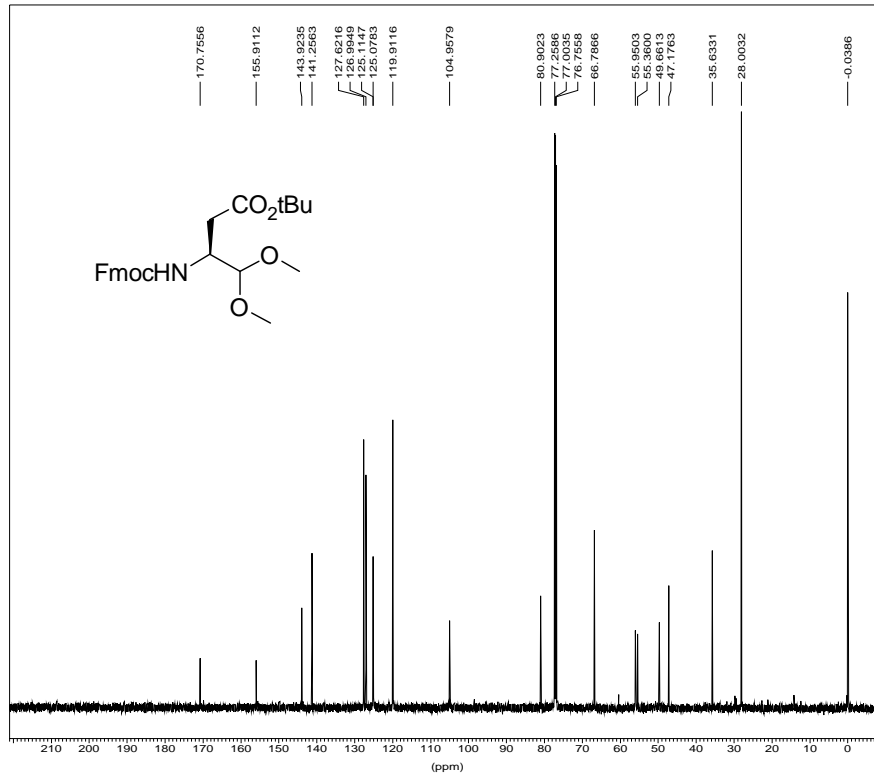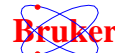

\*\*\* Current Data Parameters \*\*\*

NAME : py0718  
 EXPNO : 14  
 PROCNO : 1  
 \*\*\* Acquisition Parameters \*\*\*  
 NS : 351  
 PULPROG : zgpg30  
 RG : 16384.000000  
 SFO1 : 125.7709936 MHz  
 SOLVENT : CDCl3  
 SW : 238.7675 ppm  
 TD : 65536  
 TE : 295.3 K  
 \*\*\* Processing Parameters \*\*\*  
 LB : 1.00 Hz  
 WDW : EM

1H AMX500 warhead1 in CDCl3

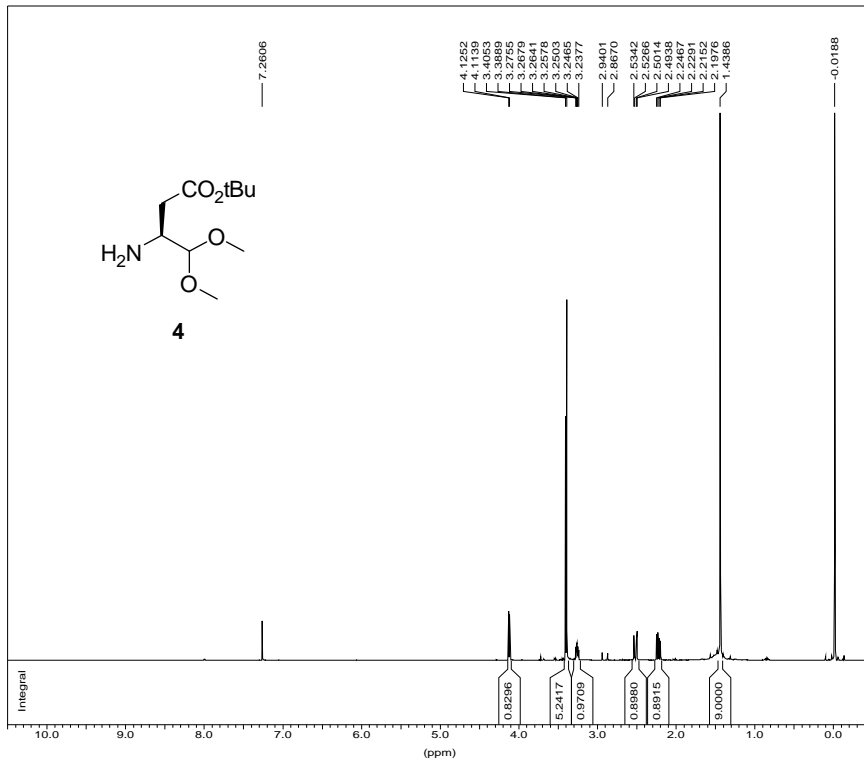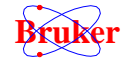

\*\*\* Current Data Parameters \*\*\*

NAME : py0717  
EXPNO : 1  
PROCNO : 1  
\*\*\* Acquisition Parameters \*\*\*  
NS : 8  
PULPROG : zg30  
RG : 80.599985  
SFO1 : 500.1330885 MHz  
SOLVENT : CDCl3  
SW : 20.6557 ppm  
TD : 32768  
TE : 295.6 K  
\*\*\* Processing Parameters \*\*\*  
LB : 0.30 Hz  
WDW : EM

13C AMX500 warhead2 in CDCl3

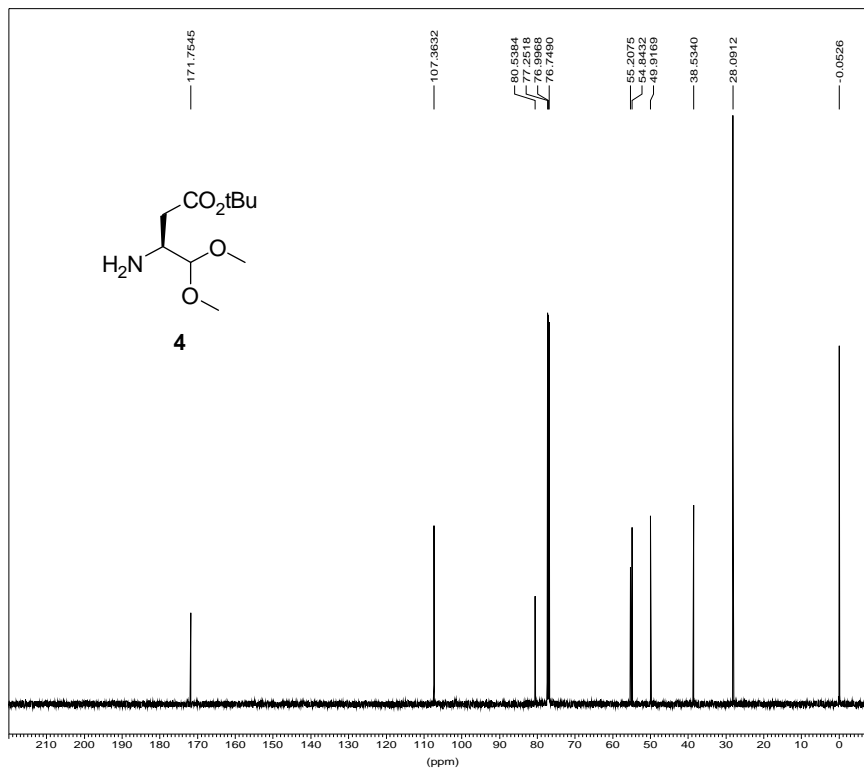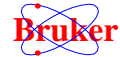

\*\*\* Current Data Parameters \*\*\*

NAME : py0717  
EXPNO : 2  
PROCNO : 1  
\*\*\* Acquisition Parameters \*\*\*  
NS : 301  
PULPROG : zgpg30  
RG : 16384.000000  
SFO1 : 125.7709936 MHz  
SOLVENT : CDCl3  
SW : 238.7675 ppm  
TD : 65536  
TE : 295.8 K  
\*\*\* Processing Parameters \*\*\*  
LB : 1.00 Hz  
WDW : EM

PY\_02\_158 AldWarhClcPrecursor in CDCl3

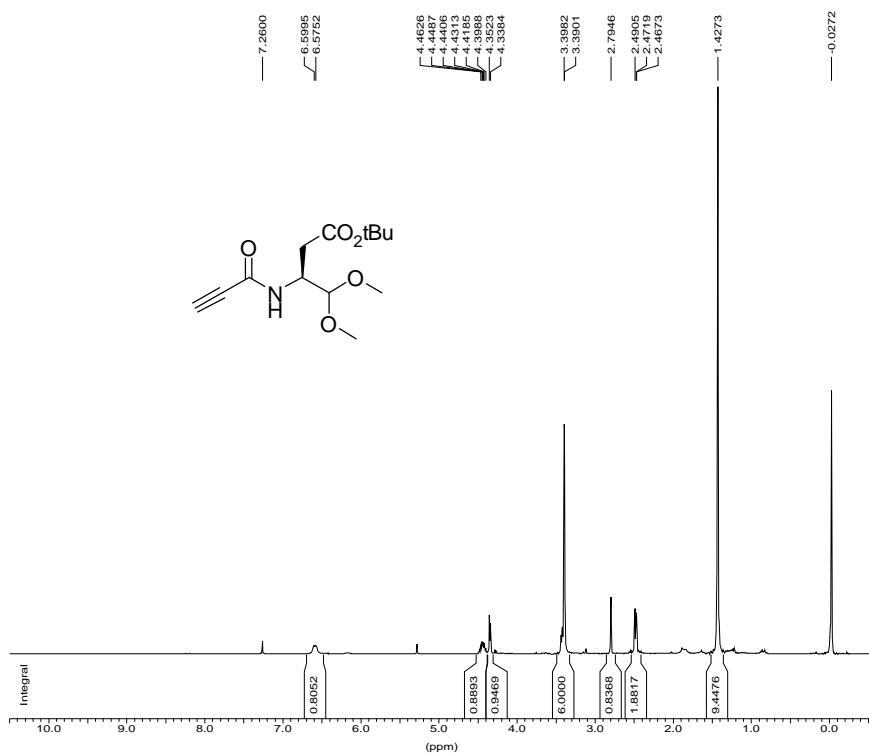

\*\*\* Current Data Parameters \*\*\*  
 NAME : ag23py  
 EXPNO : 1  
 PROCNO : 1  
 \*\*\* Acquisition Parameters \*\*\*  
 NS : 8  
 PULPROG : zg30  
 RG : 101.5999985  
 SFO1 : 300.1315000 MHz  
 SOLVENT : CDCl3  
 SW : 19.0175 ppm  
 TD : 16384  
 TE : 0.0 K  
 \*\*\* Processing Parameters \*\*\*  
 LB : 0.20 Hz  
 WDW : EM

PY\_02\_158 AldWarhClcPrecursor in CDCl3

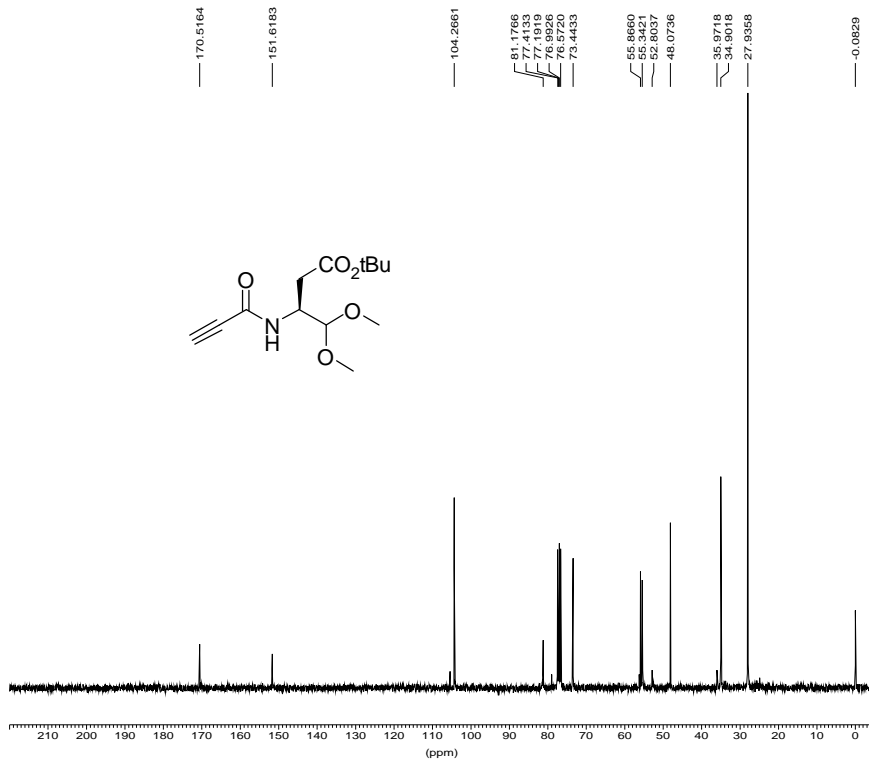

\*\*\* Current Data Parameters \*\*\*  
 NAME : ag23py  
 EXPNO : 2  
 PROCNO : 1  
 \*\*\* Acquisition Parameters \*\*\*  
 NS : 206  
 PULPROG : zgdc  
 RG : 16384.0000000  
 SFO1 : 75.4760840 MHz  
 SOLVENT : CDCl3  
 SW : 241.7743 ppm  
 TD : 32768  
 TE : 0.0 K  
 \*\*\* Processing Parameters \*\*\*  
 LB : 2.00 Hz  
 WDW : EM



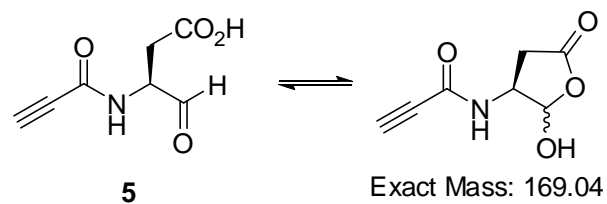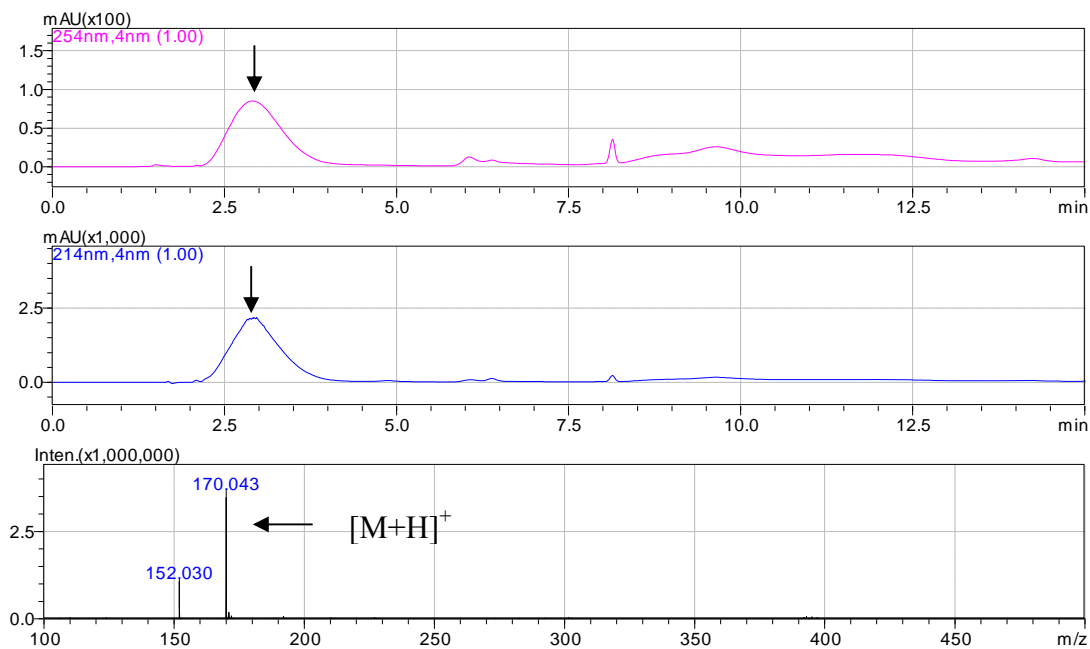

Compound **5** exists as an isomeric mixture (3 isomers).  $^1\text{H}$  NMR cannot be properly interpreted. LCMS shows a broad peak corresponding to the correct molecular mass, TOF-MS:  $m/z$  170.039  $[M + H]^+$ .

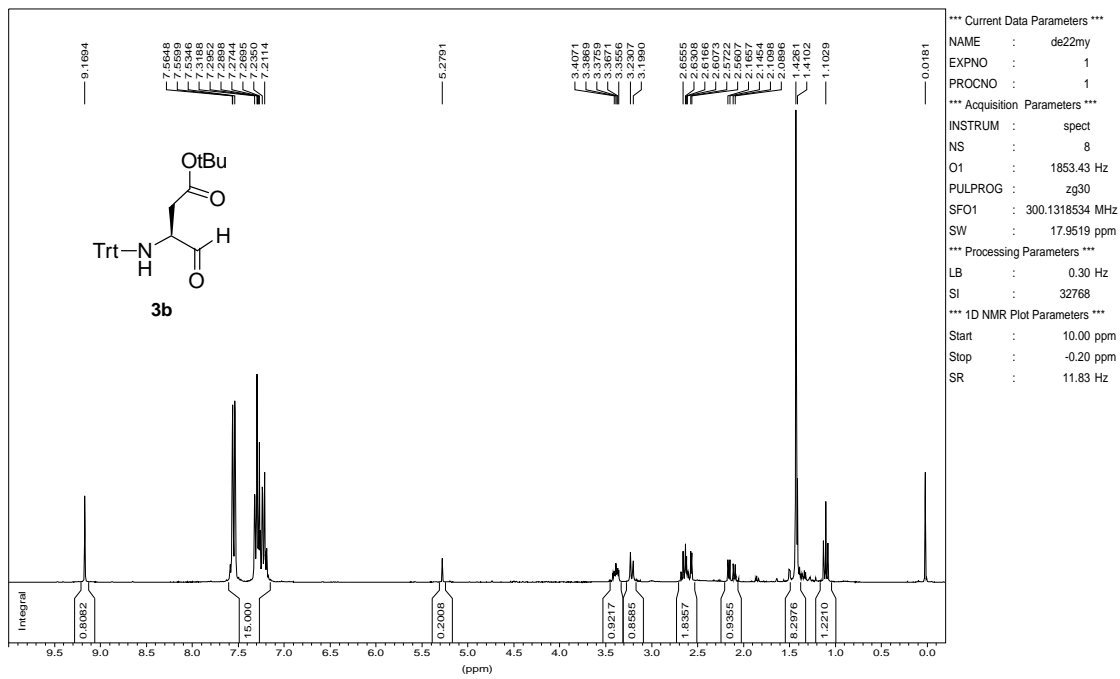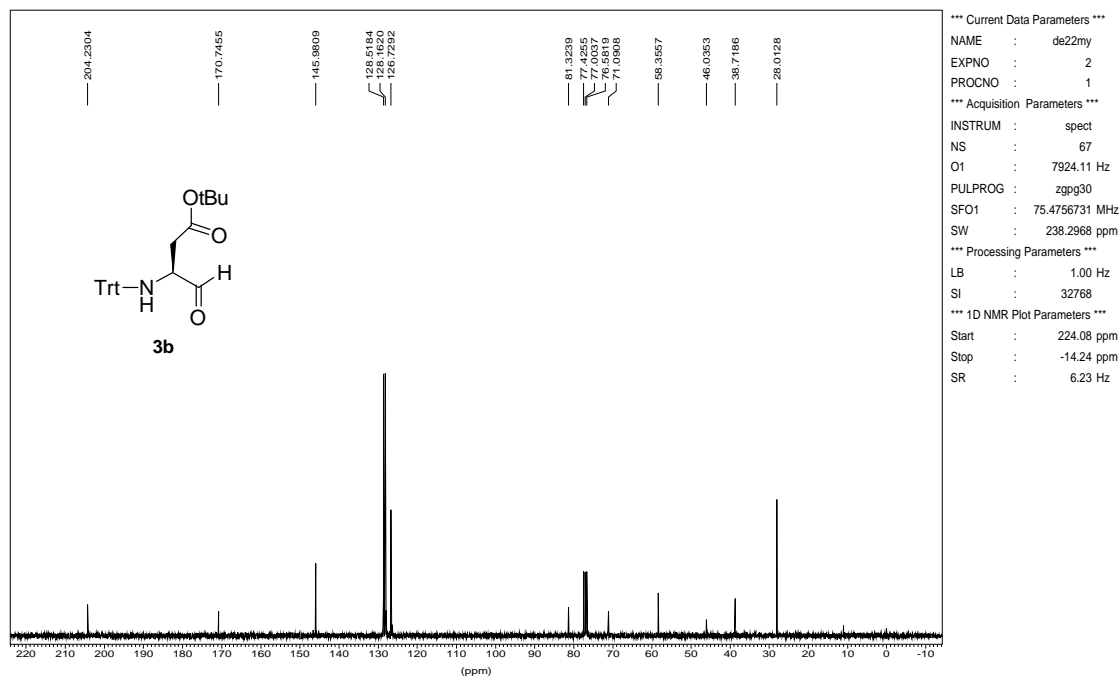

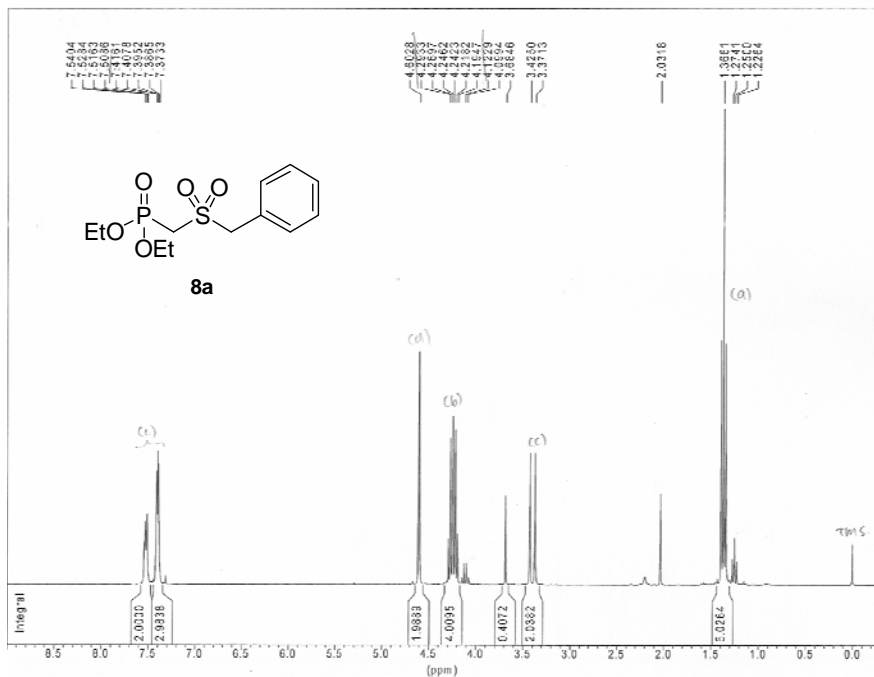

\*\*\* Current Data Parameters \*\*\*

NAME : se11t01  
EXPNO : 1  
PROCNO : 1

\*\*\* Acquisition Parameters \*\*\*

BF1 : 300.1300000 MHz  
DATE\_d : Sep 11 2006  
NS : 8  
NUCLEUS : off  
PULPROG : zg30  
SFO1 : 300.1316534 MHz  
SOLVENT : CDCl3  
SW : 17.9519 ppm  
TD : 32768  
TE : 298.1 K

\*\*\* Processing Parameters \*\*\*

LB : 0.30 Hz  
SF : 300.1299951 MHz  
SI : 32768

\*\*\* 1D NMR Plot Parameters \*\*\*

SR : -4.86 Hz  
NUCLEUS : off

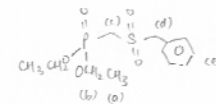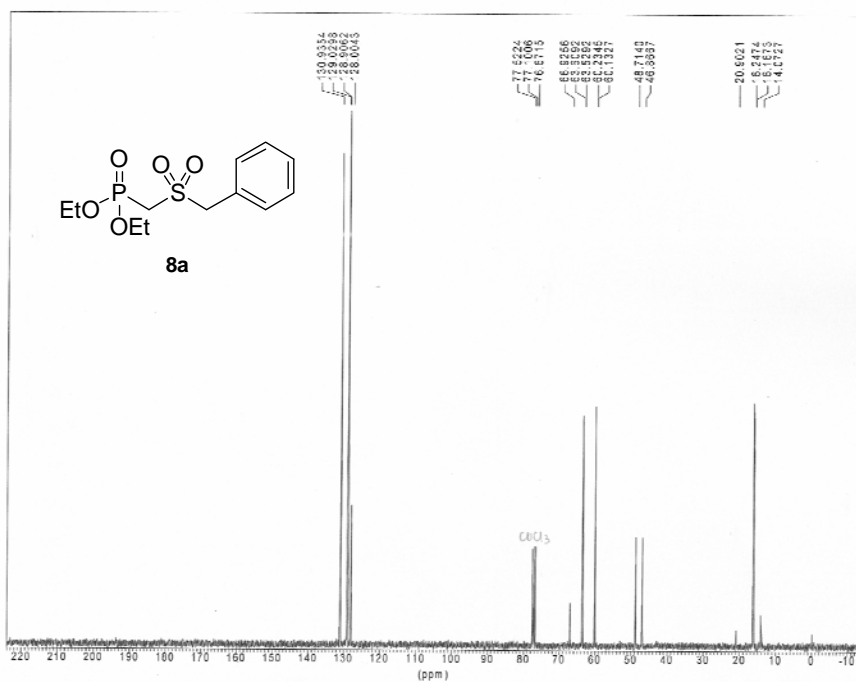

\*\*\* Current Data Parameters \*\*\*

NAME : se11t01  
EXPNO : 2  
PROCNO : 1

\*\*\* Acquisition Parameters \*\*\*

DATE\_d : Sep 11 2006  
NS : 86  
NUCLEUS : off  
PULPROG : zgpg30  
SFO1 : 75.4756731 MHz  
SOLVENT : CDCl3  
SW : 238.2968 ppm  
TD : 32768  
TE : 298.2 K

\*\*\* Processing Parameters \*\*\*

LB : 1.00 Hz  
SF : 75.4677567 MHz  
SI : 32768

\*\*\* 1D NMR Plot Parameters \*\*\*

SR : 7.70 Hz  
NUCLEUS : off

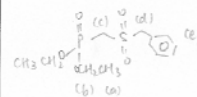

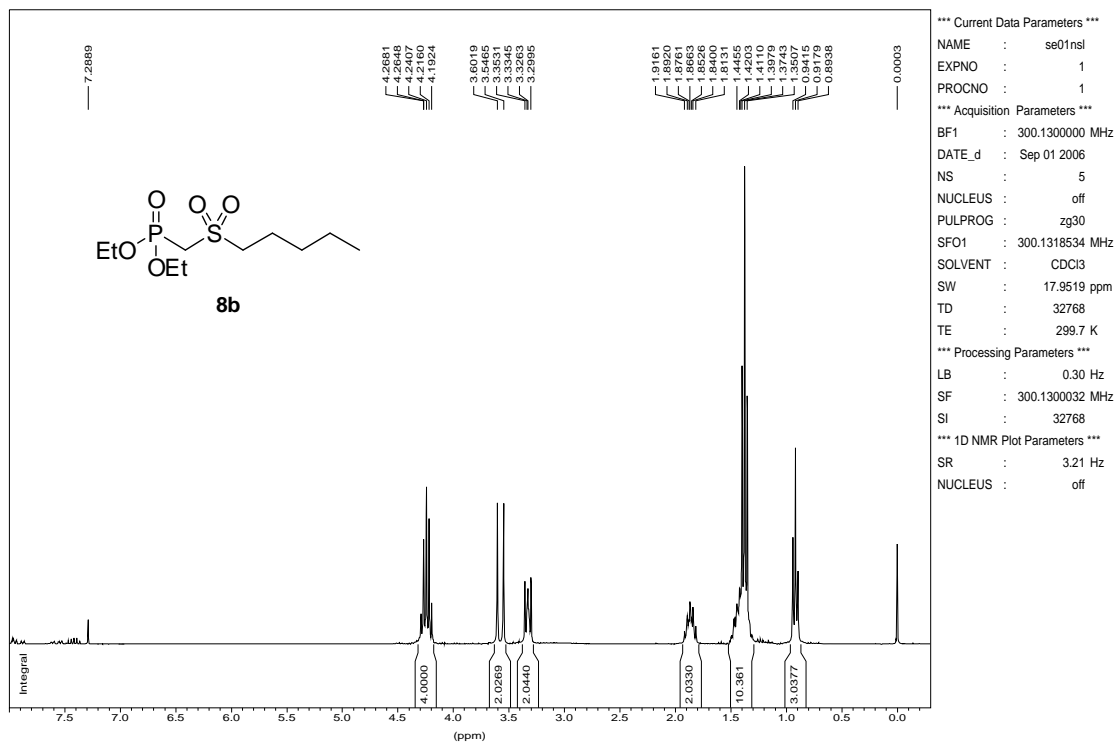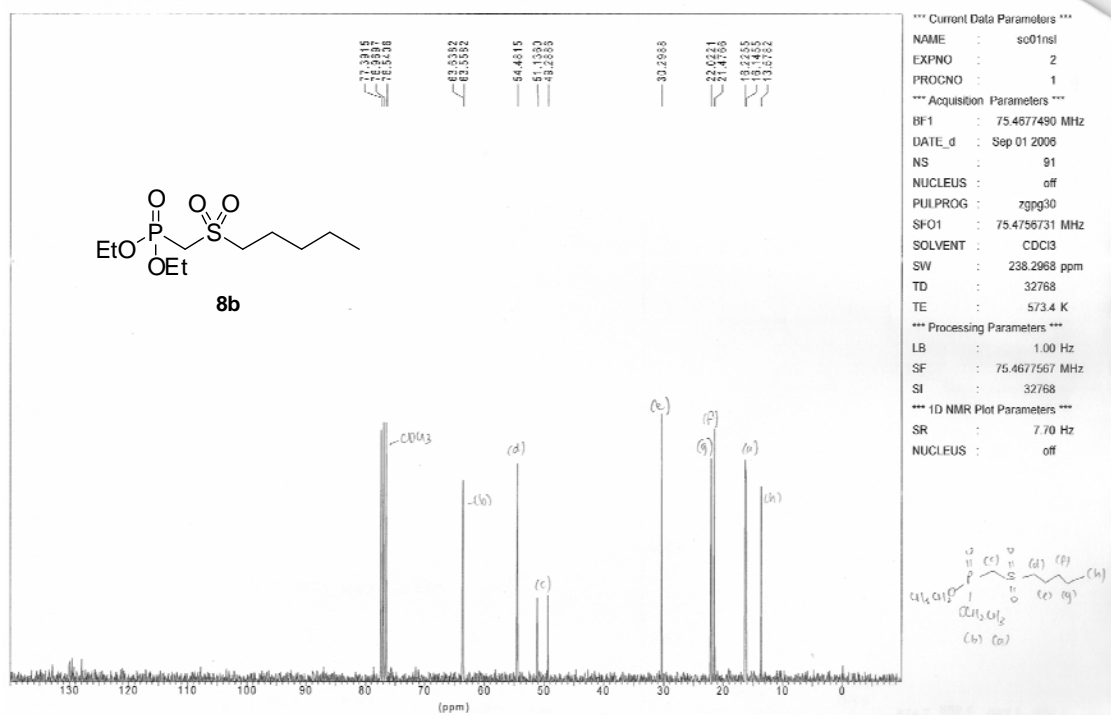

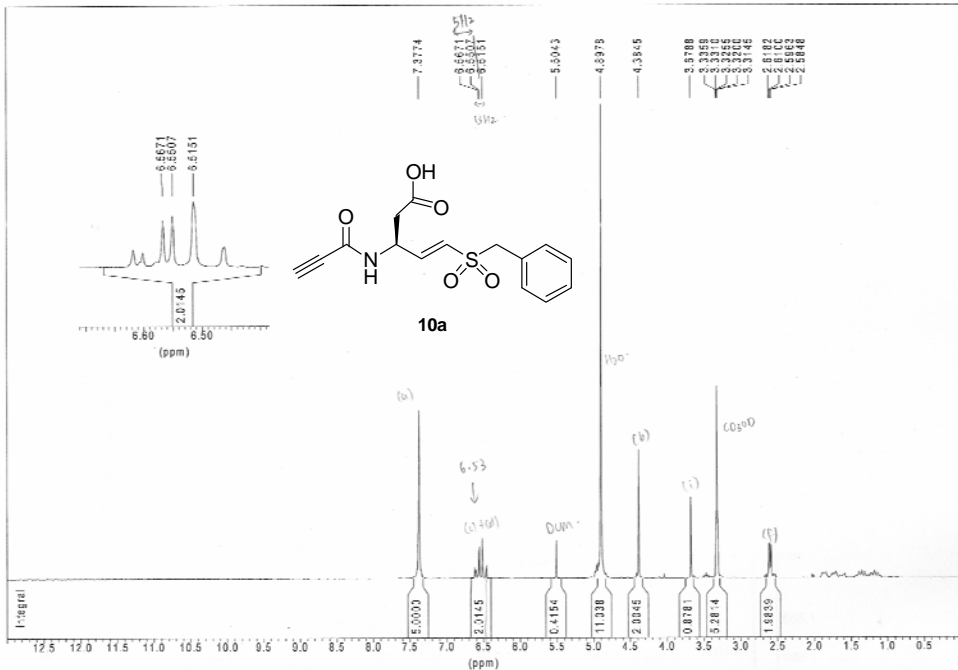

\*\*\* Current Data Parameters \*\*\*  
 NAME : ja18ns1  
 EXPNO : 1  
 PROCNO : 1  
 \*\*\* Acquisition Parameters \*\*\*  
 BF1 : 300.130000 MHz  
 DATE\_d : Jan 17 2007  
 DECNUC : off  
 NS : 12  
 NUCLEUS : off  
 PULPROG : zg30  
 SFO1 : 300.1318534 MHz  
 SOLVENT : MeOD  
 SW : 17.9519 ppm  
 TD : 32768  
 TE : 297.5 K  
 \*\*\* Processing Parameters \*\*\*  
 LB : 0.30 Hz  
 SF : 300.130000 MHz  
 SI : 32768  
 \*\*\* 1D NMR Plot Parameters \*\*\*  
 SR : 0.00 Hz  
 NUCLEUS : off

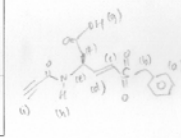

D:\COI...\_bm final wahead\_070122164942 01/22/07 04:49:42 bm final wahead  
 250C.mech  
 bm final wahead 070122164942#18-23 F1: 0.30-0.36 V: 6 NL: 5.33E6  
 T: - c Full ms [ 50.00 1000.00]

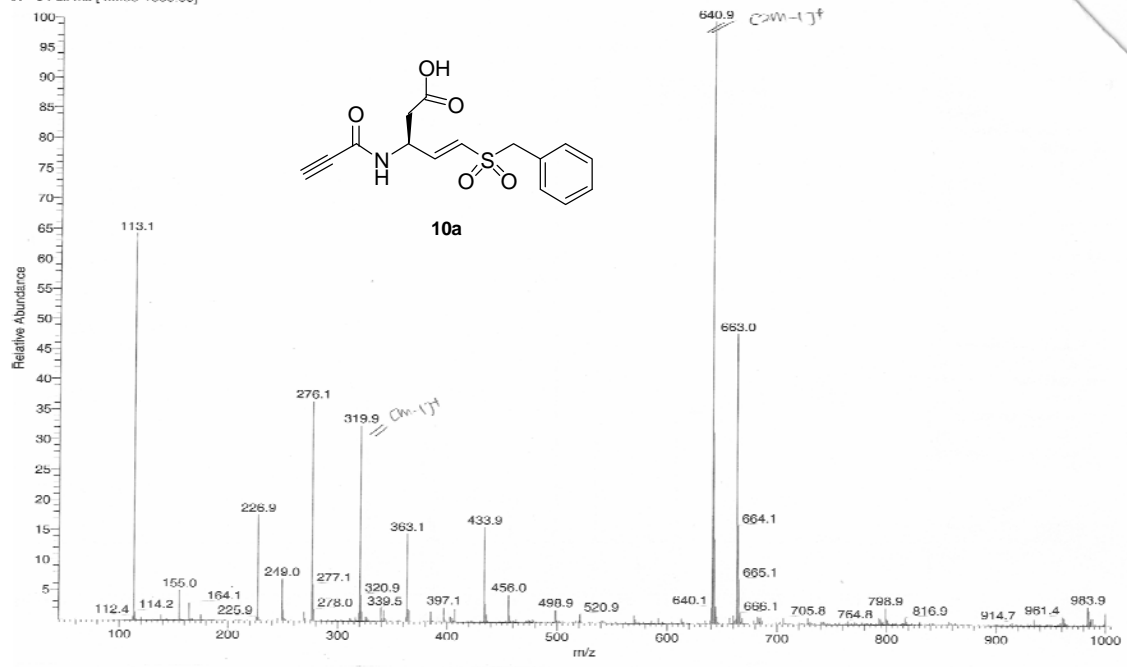

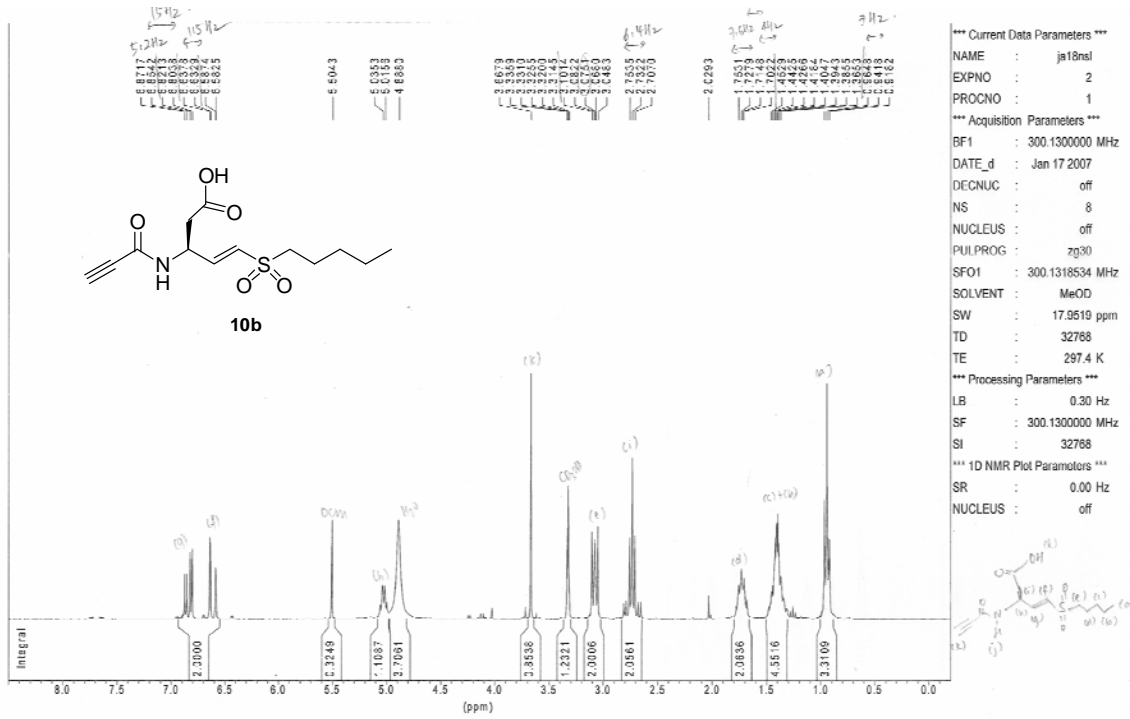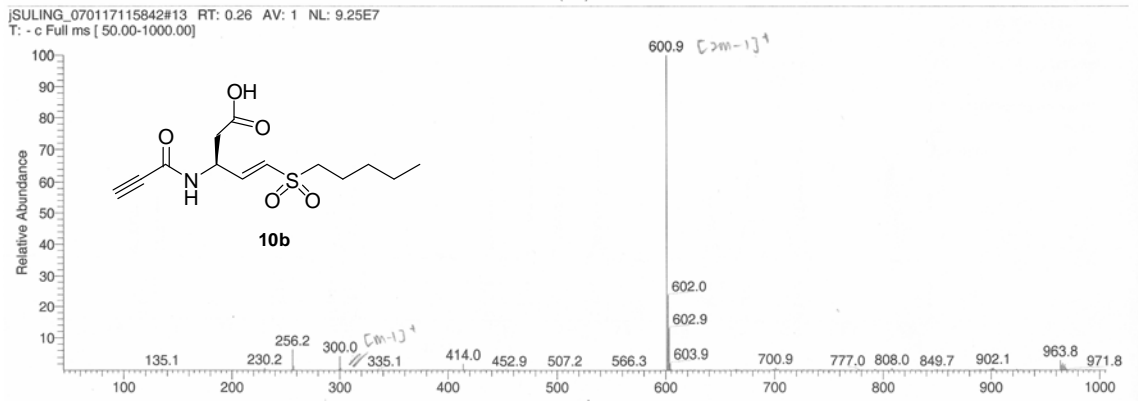

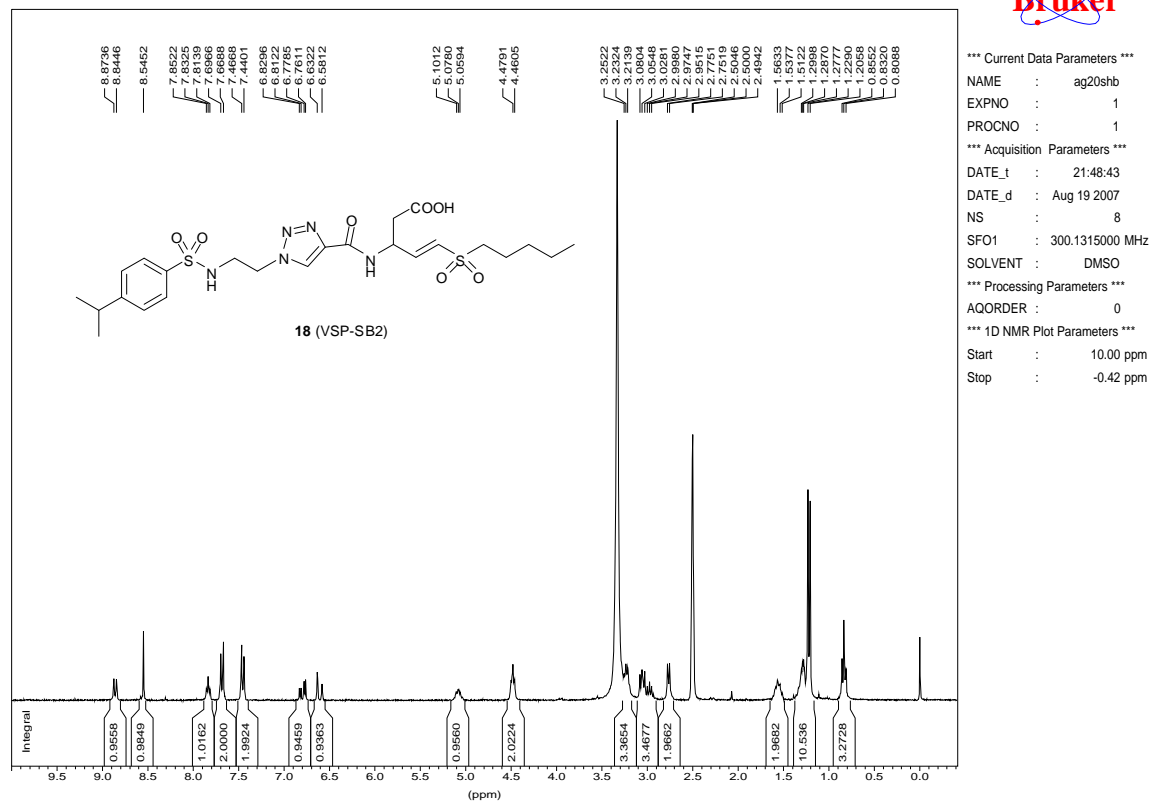

Supplement: b718304f_b.pdf [file b718304f_b.pdf]
